# Supplementary material for: Special Nuclear Structures in the Germinal Vesicle of the Common Frog with Emphasis on the So-Called Karyosphere Capsule
Source: J Dev Biol. 2023 Dec 12;11(4):44. doi: 10.3390/jdb11040044 (PMC10744300; doi:10.3390/jdb11040044)
Supplement: Supplementary file 1 [file jdb-11-00044-s001.zip › Table-S2_proteomics.xls]

## Sheet: KC proteome
						spectral counts (MS/MS summ per protein)
N	Accession	Description	Short name	ID in group	Sequence length	1	2	3	4	5	6	PAI	CC	CC	CC	CC	CC	CC	CC	CC	CC	node degree
1	XP_040190311.1	nucleoprotein TPR isoform X1 [Rana temporaria]	TPR	2	1943	0	521	343	597	441	351	0.193258					nuclear envelope		nuclear periphery	nuclear pore	Nuclear pore nuclear basket	16
2	XP_040209700.1	nuclear pore complex protein Nup153 isoform X1 [Rana temporaria]	NUP153	2	1452	0	21	23	89	32	90	0.02927					nuclear envelope		nuclear periphery	nuclear pore	Nuclear pore nuclear basket	9
3	XP_040199973.1	nuclear pore complex protein Nup107 [Rana temporaria]	NUP107	1	910	0	21	0	20	18	0	0.0108059					nuclear envelope		nuclear periphery	nuclear pore		15
4	XP_040194138.1	DNA polymerase alpha catalytic subunit isoform X1 [Rana temporaria]	POLA1	2	1475	10	86	50	55	71	59	0.0374011					nuclear envelope	nuclear matrix	nuclear periphery			8
5	XP_040198500.1	lamin-L(III)-like isoform X2 [Rana temporaria]	LAML3	3	581	11	43	21	102	250	165	0.169822					nuclear envelope		nuclear periphery			0
6	XP_040198128.1	Bloom syndrome protein [Rana temporaria]	BLM	1	1418	0	0	0	130	37	19	0.0218618	condensed nuclear chromosome					nuclear matrix	nuclear periphery			11
7	XP_040181670.1	ruvB-like 2 [Rana temporaria]	RUVBL2	1	463	0	33	62	32	0	21	0.0532757						nuclear matrix	nuclear periphery			18
8	XP_040184835.1	cofilin-1 [Rana temporaria]	CFL1	1	165	253	139	74	65	117	106	0.761616						nuclear matrix	nuclear periphery			3
9	XP_040188079.1	proteasome subunit alpha type-6 [Rana temporaria]	PSMA6	1	246	123	153	104	22	15	0	0.28252						nuclear matrix	nuclear periphery			6
10	XP_040189285.1	SNW domain-containing protein 1 [Rana temporaria]	SNW1	1	533	0	0	8	40	27	19	0.0293934						nuclear matrix	nuclear periphery			4
11	XP_040190033.1	nuclear mitotic apparatus protein 1 isoform X1 [Rana temporaria]	NUMA1	4	2305	0	10	29	40	38	56	0.012509						nuclear matrix	nuclear periphery			0
12	XP_040190817.1	non-POU domain-containing octamer-binding protein [Rana temporaria]	NONO	1	463	66	64	61	17	41	27	0.0993521						nuclear matrix	nuclear periphery			0
13	XP_040193235.1	splicing factor, proline- and glutamine-rich isoform X1 [Rana temporaria]	SFPQ	4	739	24	87	88	14	9	27	0.056157						nuclear matrix	nuclear periphery			0
14	XP_040201777.1	matrin-3 [Rana temporaria]	MATR3	2	845	0	72	93	49	0	7	0.0435897						nuclear matrix	nuclear periphery			4
15	XP_040209976.1	THO complex subunit 1 isoform X1 [Rana temporaria]	THOC1	2	671	0	12	7	0	7	0	0.00645802						nuclear matrix	nuclear periphery			6
16	XP_040213687.1	histone acetyltransferase type B catalytic subunit isoform X1 [Rana temporaria]	HAT1	3	516	255	315	203	125	214	187	0.419574						nuclear matrix	nuclear periphery			3
17	XP_040213881.1	pre-mRNA-processing factor 40 homolog A isoform X1 [Rana temporaria]	PRPF40A	3	938	0	88	87	250	142	177	0.132196						nuclear matrix	nuclear periphery			2
18	XP_040214904.1	ruvB-like 1 [Rana temporaria]	RUVBL1	1	456	10	66	65	29	30	34	0.0855263						nuclear matrix	nuclear periphery			16
19	XP_040215396.1	PHD finger-like domain-containing protein 5A [Rana temporaria]	PHF5A	1	110	13	27	26	14	10	14	0.157576						nuclear matrix	nuclear periphery			3
20	XP_040183560.1	eukaryotic translation initiation factor 6-like [Rana temporaria]	EIF6	2	278	108	126	140	86	111	79	0.389688							nuclear periphery			5
21	XP_040201846.1	proliferating cell nuclear antigen [Rana temporaria]	PCNA	1	261	437	369	239	87	67	79	0.816092							nuclear periphery			14
22	XP_040202209.1	A-kinase anchor protein 8-like isoform X1 [Rana temporaria]	AKAP8L	5	506	0	30	18	0	0	7	0.0181159							nuclear periphery			0
23	XP_040216807.1	probable rRNA-processing protein EBP2 [Rana temporaria]	EBNA1BP2	1	306	10	63	110	42	78	54	0.194444							nuclear periphery			10
24	XP_040186173.1	mitotic spindle assembly checkpoint protein MAD2A [Rana temporaria]	MAD2L1	1	203	0	50	38	59	34	32	0.174877					nuclear envelope			nuclear pore	Nuclear pore nuclear basket	15
25	XP_040212624.1	mitotic spindle assembly checkpoint protein MAD1 isoform X1 [Rana temporaria]	MAD1L1	1	722	0	60	46	153	86	131	0.10988					nuclear envelope			nuclear pore	Nuclear pore nuclear basket	4
26	XP_040184201.1	nuclear pore complex protein Nup160 isoform X1 [Rana temporaria]	NUP160	2	1414	0	7	0	18	9	9	0.00506836					nuclear envelope			nuclear pore		9
27	XP_040184655.1	nuclear receptor coactivator 5-like isoform X1 [Rana temporaria]	NCOA5	4	522	0	0	0	79	72	63	0.0683269					nuclear envelope			nuclear pore		0
28	XP_040187602.1	mRNA export factor isoform X1 [Rana temporaria]	RAE1	2	379	0	0	0	34	21	31	0.0378188					nuclear envelope			nuclear pore		10
29	XP_040201734.1	nuclear pore complex protein Nup50 isoform X1 [Rana temporaria]	NUP50	2	462	63	121	82	229	127	137	0.27381					nuclear envelope			nuclear pore		9
30	XP_040205272.1	eukaryotic translation initiation factor 5A-2 [Rana temporaria]	EIF5A.L	1	154	28	44	0	17	0	16	0.113636					nuclear envelope			nuclear pore		6
31	XP_040186305.1	SWI/SNF-related matrix-associated actin-dependent regulator of chromatin subfamily E member 1 isoform X1 [Rana temporaria]	SMARCE1	4	429	16	46	33	46	16	18	0.0679876			nBAF complex	npBAF complex						3
32	XP_040193939.1	AT-rich interactive domain-containing protein 1A isoform X1 [Rana temporaria]	ARID1A	2	2053	8	0	22	19	0	0	0.00397792			nBAF complex	npBAF complex						0
33	XP_040196208.1	SWI/SNF-related matrix-associated actin-dependent regulator of chromatin subfamily D member 1 [Rana temporaria]	SMARCD1	1	508	24	63	7	17	8	8	0.0416667			nBAF complex	npBAF complex						0
34	XP_040202396.1	transcription activator BRG1 isoform X1 [Rana temporaria]	SMARCA4	6	1641	17	67	45	105	82	66	0.0387975			nBAF complex	npBAF complex						3
35	XP_040211266.1	SWI/SNF complex subunit SMARCC1, partial [Rana temporaria]	SMARCC1	1	1106	21	81	68	100	51	76	0.0598252			nBAF complex	npBAF complex						0
36	XP_040183819.1	importin-7 [Rana temporaria]	IPO7	1	1035	12	27	10	12	9	0	0.0112721					nuclear envelope					8
37	XP_040186700.1	U3 small nucleolar RNA-associated protein 18 homolog [Rana temporaria]	UTP18	1	522	0	17	47	19	24	14	0.0386335					nuclear envelope					4
38	XP_040186801.1	exportin-2 [Rana temporaria]	CSE1L	2	972	116	132	67	85	55	114	0.0975652					nuclear envelope					4
39	XP_040193773.1	importin-9 isoform X1 [Rana temporaria]	IPO9	2	1033	0	20	11	31	12	13	0.0140368					nuclear envelope					2
40	XP_040199190.1	nuclear-interacting partner of ALK [Rana temporaria]	ZC3HC1	1	481	0	44	35	9	7	0	0.0329175					nuclear envelope					2
41	XP_040203644.1	nucleolar complex protein 4 homolog [Rana temporaria]	NOC4L-B	1	524	0	17	19	15	17	14	0.0260814					nuclear envelope					11
42	XP_040205876.1	protein CUSTOS isoform X1 [Rana temporaria]	CUSTOS	3	261	0	11	10	9	0	0	0.0191571					nuclear envelope					0
43	XP_040206955.1	barrier-to-autointegration factor-like protein [Rana temporaria]	BANF2	5	91	5	18	19	0	0	15	0.104396					nuclear envelope					0
44	XP_040207083.1	E3 ubiquitin-protein ligase FANCL isoform X1 [Rana temporaria]	FANCL	3	393	0	0	0	119	76	35	0.0975403					nuclear envelope					2
45	XP_040207277.1	poly [ADP-ribose] polymerase 1 [Rana temporaria]	PARP1	1	1008	29	391	386	577	377	317	0.343419					nuclear envelope					17
46	XP_040210190.1	GTP-binding nuclear protein Ran [Rana temporaria]	RAN	3	216	161	136	110	107	73	127	0.550926					nuclear envelope					9
47	XP_040212636.1	integrator complex subunit 1 [Rana temporaria]	INTS1	1	2208	0	6	14	104	96	88	0.0232488					nuclear envelope					0
48	XP_040213025.1	transformer-2 protein homolog beta isoform X1 [Rana temporaria]	TRA2B	4	326	9	17	8	0	0	0	0.0173824					nuclear envelope					0
49	XP_040217156.1	RRP12-like protein [Rana temporaria]	RRP12	1	1284	0	130	187	31	118	57	0.0678868					nuclear envelope					12
50	XP_040218128.1	cell division cycle and apoptosis regulator protein 1 isoform X1 [Rana temporaria]	CCAR1	3	1168	0	6	0	7	0	8	0.00299658					nuclear envelope					1
51	XP_040176449.1	wings apart-like protein homolog isoform X1 [Rana temporaria]	WAPL	2	1235	0	14	10	53	23	9	0.0147099	condensed nuclear chromosome									1
52	XP_040182364.1	serine/threonine-protein kinase Chk1 [Rana temporaria]	CHEK1	2	477	0	29	8	81	82	51	0.0877009	condensed nuclear chromosome									8
53	XP_040187161.1	breast cancer type 1 susceptibility protein [Rana temporaria]	BRCA1	1	1618	0	0	16	12	10	0	0.0039143	condensed nuclear chromosome									19
54	XP_040187755.1	homologous-pairing protein 2 homolog isoform X1 [Rana temporaria]	PSMC3IP	3	229	8	15	9	26	45	17	0.0873362	condensed nuclear chromosome									2
55	XP_040191984.1	nucleolar protein 6 [Rana temporaria]	NOL6	1	1148	0	17	27	0	39	0	0.0120499	condensed nuclear chromosome									6
56	XP_040200573.1	DNA repair protein RAD50 [Rana temporaria]	RAD50	2	1312	18	171	154	1371	1686	1139	0.576601	condensed nuclear chromosome									8
57	XP_040208963.1	DNA topoisomerase 2-binding protein 1 [Rana temporaria]	TOPBP1-A	2	1514	0	93	37	178	105	74	0.0536107	condensed nuclear chromosome									10
58	XP_040209652.1	synaptonemal complex protein 2-like isoform X1 [Rana temporaria]	SYCP2L	3	927	6	24	9	127	127	81	0.067242	condensed nuclear chromosome									0
59	XP_040210272.1	ribosome biogenesis regulatory protein homolog [Rana temporaria]	RRS1	1	367	22	108	113	38	97	31	0.18574	condensed nuclear chromosome									9
60	XP_040214212.1	MKI67 FHA domain-interacting nucleolar phosphoprotein isoform X2 [Rana temporaria]	NIFK	3	558	20	89	124	56	95	56	0.131422	condensed nuclear chromosome									5
61	XP_040178555.1	methyl-CpG-binding domain protein 3 isoform X1 [Rana temporaria]	MBD3	3	353	0	77	58	43	33	20	0.109065		heterochromatin								0
62	XP_040183833.1	SWI/SNF-related matrix-associated actin-dependent regulator of chromatin subfamily A containing DEAD/H box 1 [Rana temporaria]	SMARCAD1	1	989	12	13	18	43	0	16	0.0171891		heterochromatin								13
63	XP_040188032.1	bromodomain adjacent to zinc finger domain protein 1A [Rana temporaria]	BAZ1A	1	1518	16	160	108	63	36	42	0.0466623		heterochromatin								5
64	XP_040190334.1	transcriptional regulator ATRX [Rana temporaria]	ATRX	1	1916	0	30	19	18	0	0	0.00582811		heterochromatin								9
65	XP_040194262.1	tyrosine-protein kinase BAZ1B isoform X1 [Rana temporaria]	BAZ1B	2	1489	22	130	66	58	41	34	0.0392881		heterochromatin								2
66	XP_040208293.1	E3 ubiquitin-protein ligase UHRF1-like [Rana temporaria]	UHRF1	1	767	95	229	163	208	167	190	0.228596		heterochromatin								4
67	XP_040208826.1	chromobox protein homolog 3 isoform X1 [Rana temporaria]	CBX3	4	184	116	77	46	36	36	38	0.316123		heterochromatin								1
68	XP_040218135.1	lymphoid-specific helicase [Rana temporaria]	HELLS	1	823	0	31	28	85	160	115	0.0848522		heterochromatin								14
69	XP_040184579.1	zinc finger protein ubi-d4 isoform X1 [Rana temporaria]	REQ-A	2	402	0	14	21	9	8	0	0.0215589			nBAF complex							0
70	XP_040189423.1	serine/threonine-protein kinase VRK1 [Rana temporaria]	VRK1	1	319	0	36	75	98	121	29	0.187565										0
71	XP_040205357.1	actin-like protein 6A [Rana temporaria]	ACTL6A	3	429	13	43	20	23	17	14	0.0505051										5
72	XP_040213048.1	actin, cytoplasmic 1 [Rana temporaria]	ACTB	9	375	1667	2227	1801	720	663	685	3.45022										3
73	XP_040176558.1	SURP and G-patch domain-containing protein 1 [Rana temporaria]	SUGP1	1	623	0	0	9	116	80	84	0.0773141
74	XP_040176596.1	adenosine kinase isoform X1 [Rana temporaria]	ADK	3	364	227	289	149	39	41	64	0.370421
75	XP_040176722.1	pre-mRNA-processing factor 19 [Rana temporaria]	PRPF19	1	504	70	186	180	264	124	119	0.311839
76	XP_040176729.1	catenin delta-1-like isoform X4 [Rana temporaria]	CTNND1	4	877	0	0	0	7	12	8	0.00513113
77	XP_040176748.1	60S ribosomal protein L7-like 1 [Rana temporaria]	RPL7L1	1	246	13	36	36	23	23	23	0.104336
78	XP_040176757.1	SURP and G-patch domain-containing protein 2 [Rana temporaria]	SUGP2	2	1055	0	20	54	8	7	7	0.0151659
79	XP_040176793.1	glutathione S-transferase P 1-like isoform X2 [Rana temporaria]	GSTP1	5	210	294	270	218	119	94	103	0.871429
80	XP_040176815.1	FACT complex subunit SSRP1 isoform X1 [Rana temporaria]	SSRP1	2	697	191	362	292	180	144	135	0.311813
81	XP_040176830.1	coiled-coil domain-containing protein 86 [Rana temporaria]	CCDC86	1	282	0	23	24	14	16	0	0.0455083
82	XP_040176844.1	probable ATP-dependent RNA helicase DDX49 [Rana temporaria]	DDX49	1	479	0	30	42	21	36	13	0.0494085
83	XP_040176905.1	Histone H3	H3	16	330	115	152	143	120	125	131	0.39697
84	XP_040176914.1	macrophage-capping protein [Rana temporaria]	CAPG	1	346	31	32	16	19	28	19	0.0698459
85	XP_040176959.1	pre-rRNA 2'-O-ribose RNA methyltransferase FTSJ3 [Rana temporaria]	FTSJ3	1	841	0	81	63	120	119	81	0.091954
86	XP_040177443.1	NACHT, LRR and PYD domains-containing protein 12-like [Rana temporaria]	NLRP14	4	1035	309	234	131	42	17	8	0.119324
87	XP_040178046.1	polypyrimidine tract-binding protein 1 [Rana temporaria]	PTBP1	1	539	22	7	10	49	24	31	0.0442177
88	XP_040178123.1	WD repeat-containing protein 18 [Rana temporaria]	WDR18	1	428	34	166	160	72	27	25	0.188474
89	XP_040178148.1	histone H3-like centromeric protein hcp-3 [Rana temporaria]	HCP3	18	432	154	224	173	170	143	148	0.390432
90	XP_040178348.1	Zinc finger protein 208	ZNF208	34	2861	18	175	162	31	25	48	0.0267389
91	XP_040178457.1	hepatoma-derived growth factor-related protein 2 isoform X1 [Rana temporaria]	HDGFL2	2	601	10	11	11	11	11	11	0.0180255
92	XP_040178601.1	STING ER exit protein	STEEP1;	1	222	0	10	8	12	13	13	0.042042
93	XP_040178651.1	G-patch domain and KOW motifs-containing protein [Rana temporaria]	GPKOW	1	489	0	15	23	82	66	112	0.101568
94	XP_040178726.1	H/ACA ribonucleoprotein complex subunit DKC1 isoform X1 [Rana temporaria]	DKC1	2	525	0	32	60	22	34	19	0.0530159
95	XP_040178757.1	40S ribosomal protein S4, X isoform [Rana temporaria]	RPS4	1	263	0	12	23	12	0	11	0.0367554
96	XP_040178793.1	RNA-binding protein 34 [Rana temporaria]	RBM34	1	411	7	67	101	18	31	19	0.0985401
97	XP_040178861.1	E3 ubiquitin-protein ligase HUWE1 isoform X1 [Rana temporaria]	HUWE1	11	4390	109	274	144	26	16	17	0.0222475
98	XP_040178880.1	host cell factor 1 isoform X1 [Rana temporaria]	HCFC1	7	2112	21	97	72	58	46	20	0.024779
99	XP_040178912.1	transketolase-like protein 2 [Rana temporaria]	TKTL2	1	625	429	409	285	120	93	91	0.380533
100	XP_040178920.1	U8 snoRNA-decapping enzyme-like [Rana temporaria]	NUDT16	1	224	35	9	9	14	15	24	0.078869
101	XP_040179030.1	large proline-rich protein BAG6 isoform X1 [Rana temporaria]	BAG6	4	1151	74	203	47	167	136	199	0.119606
102	XP_040179092.1	flavin reductase (NADPH) [Rana temporaria]	BLVRB	1	221	14	11	0	0	9	10	0.0331825
103	XP_040179192.1	splicing factor 3A subunit 2 [Rana temporaria]	SF3A2	1	389	0	0	0	20	11	10	0.0175664
104	XP_040179206.1	ribosome biogenesis protein NOP53 [Rana temporaria]	NOP53	1	448	7	99	67	92	105	90	0.171131
105	XP_040179339.1	guanidinoacetate N-methyltransferase [Rana temporaria]	GAMT	1	233	32	26	7	6	6	8	0.0608011
106	XP_040179406.1	mediator of DNA damage checkpoint protein 1 isoform X1 [Rana temporaria]	MDC1	3	2460	10	93	155	385	575	424	0.111247
107	XP_040179415.1	U6 snRNA-associated Sm-like protein LSm2 [Rana temporaria]	LSM2	1	95	25	14	11	10	11	13	0.147368
108	XP_040179433.1	N(G),N(G)-dimethylarginine dimethylaminohydrolase 2 [Rana temporaria]	DDAH1	3	272	16	17	10	0	0	0	0.026348
109	XP_040179452.1	casein kinase II subunit beta isoform X1 [Rana temporaria]	CSNK2B	3	232	46	44	28	21	15	8	0.116379
110	XP_040179475.1	SUMO-activating enzyme subunit 1 isoform X1 [Rana temporaria]	SAE1	2	344	294	243	140	69	65	56	0.420058
111	XP_040179531.1	tubulin-folding cofactor B [Rana temporaria]	TBCB	1	246	115	73	25	44	46	67	0.250678
112	XP_040179534.1	DNA-directed RNA polymerase II subunit RPB9 [Rana temporaria]	POLR2I	1	135	8	18	7	0	0	0	0.0407407
113	XP_040179536.1	60S ribosomal protein L14 [Rana temporaria]	RPL14	1	139	9	20	30	35	51	34	0.214628
114	XP_040179690.1	cold-inducible RNA-binding protein B-like isoform X1 [Rana temporaria]	CIRBP	6	173	355	227	197	146	133	138	1.15222
115	XP_040179694.1	RNA-binding motif protein, X chromosome isoform X1 [Rana temporaria]	RBMX	2	377	23	36	42	15	7	0	0.0543767
116	XP_040179745.1	high mobility group protein B3 [Rana temporaria]	HMGB3	2	203	78	105	26	40	46	38	0.273399
117	XP_040179796.1	phosphoglycerate kinase [Rana temporaria]	PGK	1	417	178	234	180	104	62	85	0.33693
118	XP_040179868.1	THO complex subunit 2 [Rana temporaria]	THOC2	1	1590	0	37	44	0	25	0	0.0111111
119	XP_040179881.1	cullin-4B [Rana temporaria]	CUL4B	1	906	0	25	10	12	9	12	0.0125092
120	XP_040179885.1	ribosomal biogenesis protein LAS1L [Rana temporaria]	LAS1L	1	587	8	37	37	19	7	13	0.0343555
121	XP_040179932.1	60S ribosomal protein L7a isoform X1 [Rana temporaria]	RPL7A	2	282	22	67	108	74	83	53	0.240544
122	XP_040179941.1	DNA-directed RNA polymerases I, II, and III subunit RPABC1 [Rana temporaria]	POLR2E	2	210	15	21	41	0	32	0	0.0865079
123	XP_040179943.1	surfeit locus protein 2 [Rana temporaria]	SURF2	1	228	21	27	33	42	30	28	0.13231
124	XP_040180092.1	RNA exonuclease 4 [Rana temporaria]	REXO4	4	410	0	0	9	0	13	8	0.0121951
125	XP_040180120.1	negative elongation factor B [Rana temporaria]	NELFB	1	615	0	8	10	11	25	23	0.0208672
126	XP_040180183.1	U3 small nucleolar ribonucleoprotein protein IMP4 [Rana temporaria]	IMP4	1	291	0	21	21	0	11	0	0.0303551
127	XP_040180187.1	ubiquitin-like modifier-activating enzyme 1 isoform X1 [Rana temporaria]	UBA1	6	1099	187	276	191	246	213	267	0.209281
128	XP_040180213.1	protein FAM50A [Rana temporaria]	FAM50A-B	1	348	0	7	7	26	24	29	0.0445402
129	XP_040180237.1	60S ribosomal protein L12 isoform X1 [Rana temporaria]	RPL12	2	165	0	18	12	37	47	33	0.148485
130	XP_040180247.1	DNA polymerase epsilon subunit 3 [Rana temporaria]	POLE3	1	151	30	35	24	0	0	0	0.098234
131	XP_040180258.1	U4/U6 small nuclear ribonucleoprotein Prp4 [Rana temporaria]	PRPF4	1	506	0	99	74	111	95	55	0.142951
132	XP_040180356.1	probable ATP-dependent RNA helicase DDX31 isoform X1 [Rana temporaria]	DDX31	2	701	0	28	54	0	30	12	0.0294817
133	XP_040180411.1	endothelial differentiation-related factor 1 [Rana temporaria]	EDF1	1	148	0	0	0	18	10	8	0.0405405
134	XP_040180466.1	transcription initiation factor IIE subunit beta [Rana temporaria]	GTF2E2	1	287	0	9	27	15	21	15	0.0505226
135	XP_040180474.1	activator of basal transcription 1 [Rana temporaria]	ABT1	1	298	0	19	23	18	28	19	0.0598434
136	XP_040180482.1	polyglutamine-binding protein 1 [Rana temporaria]	PQBP1	4	209	0	20	0	13	19	0	0.0414673
137	XP_040180621.1	splicing factor U2AF 35 kDa subunit-like [Rana temporaria]	U2AF1	1	282	0	29	0	42	0	24	0.0561466
138	XP_040180654.1	putative methyltransferase C9orf114 homolog [Rana temporaria]	SPOUT1	1	373	0	48	47	0	10	0	0.0469169
139	XP_040180665.1	protein SET isoform X1 [Rana temporaria]	SET	2	280	192	115	86	48	51	41	0.317262
140	XP_040180772.1	ubiquitin-like protein 4A [Rana temporaria]	UBL4A	1	146	32	14	0	0	0	9	0.0627854
141	XP_040180799.1	proteasome subunit beta type-7 [Rana temporaria]	PSMB7	1	277	9	38	31	0	0	0	0.0469314
142	XP_040180887.1	kinesin-like protein KIFC1 isoform X1 [Rana temporaria]	CTK2	2	641	0	43	50	43	100	92	0.0852834
143	XP_040180925.1	40S ribosomal protein S5 [Rana temporaria]	RPS5	1	203	0	0	26	0	12	8	0.0377668
144	XP_040180948.1	exonuclease 1 [Rana temporaria]	EXO1	1	740	0	0	17	14	13	14	0.0130631
145	XP_040181078.1	heterogeneous nuclear ribonucleoprotein D0 isoform X1 [Rana temporaria]	HNRNPD	6	333	41	121	130	104	61	87	0.272272
146	XP_040181187.1	integrator complex subunit 10 isoform X1 [Rana temporaria]	INTS10	4	745	0	8	0	67	63	42	0.0402685
147	XP_040181278.1	Werner syndrome ATP-dependent helicase isoform X1 [Rana temporaria]	WRN	2	1426	0	43	15	52	257	167	0.0624123
148	XP_040181503.1	DNA ligase 1 isoform X1 [Rana temporaria]	LIG1	4	990	141	301	186	315	260	258	0.24596
149	XP_040181557.1	splicing factor U2AF 65 kDa subunit isoform X1 [Rana temporaria]	U2AF2	4	482	9	26	21	31	31	28	0.0504841
150	XP_040181583.1	60S ribosomal protein L18 [Rana temporaria]	RPL18-B	2	188	20	66	44	52	54	32	0.237589
151	XP_040181644.1	60S ribosomal protein L36 [Rana temporaria]	RPL36	2	105	13	24	21	21	34	31	0.228571
152	XP_040181789.1	integrator complex subunit 11 [Rana temporaria]	INTS11	1	600	0	0	8	43	33	29	0.0313889
153	XP_040181875.1	enolase isoform X1 [Rana temporaria]	ENOA	3	434	230	299	200	20	0	15	0.293395
154	XP_040181892.1	nucleolar complex protein 2 homolog [Rana temporaria]	NOC2L	1	774	0	33	62	20	32	13	0.0344531
155	XP_040182071.1	60S ribosomal protein L27a [Rana temporaria]	RPL27A	3	148	28	15	0	24	17	0	0.0945946
156	XP_040182213.1	something about silencing protein 10 [Rana temporaria]	UTP3	1	465	0	27	42	24	24	24	0.0505376
157	XP_040182215.1	peptidyl-prolyl cis-trans isomerase H [Rana temporaria]	PPIH	1	177	0	0	10	0	9	9	0.0263653
158	XP_040182275.1	spermidine synthase [Rana temporaria]	SRM	1	290	33	0	0	7	8	0	0.0275862
159	XP_040182288.1	centromere protein S [Rana temporaria]	CENPS	1	140	0	11	0	67	51	41	0.202381
160	XP_040182302.1	thymocyte nuclear protein 1 isoform X1 [Rana temporaria]	THYN1	4	224	48	65	57	18	44	44	0.205357
161	XP_040182323.1	heat shock cognate 71 kDa protein [Rana temporaria]	HSPA8	1	647	361	481	324	288	293	286	0.523699
162	XP_040182379.1	transcription intermediary factor 1-beta isoform X1 [Rana temporaria]	TRIM28	2	777	224	427	320	199	204	210	0.339768
163	XP_040182383.1	prostamide/prostaglandin F synthase [Rana temporaria]	PRXL2B	1	201	0	12	9	9	11	10	0.0422886
164	XP_040182440.1	polynucleotide 5'-hydroxyl-kinase NOL9 [Rana temporaria]	NOL9	1	624	0	8	24	7	0	0	0.0104167
165	XP_040182511.1	Parkinson disease protein 7 [Rana temporaria]	PARK7	1	189	115	172	63	0	0	0	0.308642
166	XP_040182723.1	mRNA turnover protein 4 homolog [Rana temporaria]	MRTO4	1	247	16	75	79	89	75	57	0.263833
167	XP_040182733.1	selenoprotein H [Rana temporaria]	SELENOH	1	114	9	39	21	0	10	0	0.115497
168	XP_040182838.1	probable ribosome biogenesis protein RLP24 [Rana temporaria]	RSL24D1	1	130	0	0	21	12	14	0	0.0602564
169	XP_040183041.1	RNA-binding protein 42 [Rana temporaria]	RBM42	1	485	0	7	8	0	7	0	0.00756014
170	XP_040183093.1	26S proteasome regulatory subunit 6B [Rana temporaria]	PSMC4	1	420	100	52	53	10	12	0	0.0900794
171	XP_040183131.1	rRNA 2'-O-methyltransferase fibrillarin [Rana temporaria]	FBL	1	334	25	180	120	107	107	83	0.310379
172	XP_040183292.1	DNA repair protein XRCC1 [Rana temporaria]	XRCC1	1	640	14	40	29	21	24	9	0.0356771
173	XP_040183347.1	serine/threonine-protein phosphatase 2A 65 kDa regulatory subunit A alpha isoform [Rana temporaria]	PPP2R1A	1	589	0	12	0	7	10	8	0.0104697
174	XP_040183452.1	protein arginine N-methyltransferase 1 isoform X1 [Rana temporaria]	PRMT1-A	2	369	75	75	59	7	0	9	0.101626
175	XP_040183499.1	DNA polymerase delta catalytic subunit [Rana temporaria]	POLD1	2	1104	123	359	200	250	252	217	0.211504
176	XP_040183506.1	mediator of RNA polymerase II transcription subunit 25 isoform X1 [Rana temporaria]	MED25	4	803	6	0	0	9	15	0	0.00622665
177	XP_040183528.1	bifunctional polynucleotide phosphatase/kinase isoform X1 [Rana temporaria]	PNKP	3	629	15	141	70	119	157	134	0.168521
178	XP_040183550.1	protein SDA1 homolog [Rana temporaria]	SDAD1	1	686	0	32	30	0	27	20	0.026482
179	XP_040183754.1	COP9 signalosome complex subunit 4 [Rana temporaria]	COPS4	1	406	17	26	20	23	28	20	0.0550082
180	XP_040183928.1	general transcription factor IIH subunit 1 isoform X1 [Rana temporaria]	GTF2H1	3	547	0	19	13	16	68	17	0.0405241
181	XP_040184033.1	tuftelin-interacting protein 11 [Rana temporaria]	TFIP11	2	823	0	0	0	25	10	8	0.00870798
182	XP_040184034.1	RNA cytidine acetyltransferase [Rana temporaria]	NAT10	1	1032	0	215	250	160	164	66	0.138081
183	XP_040184142.1	alcohol dehydrogenase class-3 [Rana temporaria]	ADHX	1	376	50	75	49	16	0	0	0.0842199
184	XP_040184171.1	26S proteasome regulatory subunit 6A [Rana temporaria]	PSMC3	1	423	27	107	79	28	17	10	0.105595
185	XP_040184180.1	NADP-dependent alcohol dehydrogenase [Rana temporaria]	ADH8	1	373	50	76	45	15	22	21	0.102324
186	XP_040184203.1	formin-binding protein 4 isoform X1 [Rana temporaria]	FNBP4	2	928	0	17	25	25	17	7	0.0163434
187	XP_040184331.1	DNA damage-binding protein 1 [Rana temporaria]	DDB1	1	1140	37	135	57	0	0	0	0.0334795
188	XP_040184361.1	flap endonuclease 1 [Rana temporaria]	FEN1-A	1	383	107	196	97	122	99	67	0.299391
189	XP_040184373.1	26S proteasome non-ATPase regulatory subunit 13 [Rana temporaria]	PSMD13	1	378	15	49	21	23	17	0	0.0551146
190	XP_040184388.1	lymphocyte-specific protein 1 isoform X1 [Rana temporaria]	LSP1	2	420	0	49	54	8	0	0	0.0440476
191	XP_040184547.1	PHD and RING finger domain-containing protein 1 isoform X1 [Rana temporaria]	PHRF1	3	1801	0	6	18	9	0	0	0.00305386
192	XP_040184567.1	transaldolase isoform X1 [Rana temporaria]	TALDO1	3	333	15	48	25	0	0	0	0.044044
193	XP_040184574.1	DNA polymerase alpha subunit B [Rana temporaria]	POLA2	2	596	21	30	14	40	20	22	0.0411074
194	XP_040184711.1	splicing factor 1 isoform X1 [Rana temporaria]	SF1	2	592	26	50	47	68	77	76	0.0968468
195	XP_040184723.1	tRNA-dihydrouridine(20) synthase [NAD(P)+]-like isoform X1 [Rana temporaria]	DUS2	7	487	9	51	24	0	9	12	0.0359343
196	XP_040184733.1	RNA-binding protein 4B isoform X1 [Rana temporaria]	RBM4B	3	326	23	139	146	110	41	93	0.282209
197	XP_040184759.1	splicing factor 3B subunit 2 [Rana temporaria]	SF3B2	1	753	0	73	51	21	21	21	0.04139
198	XP_040184825.1	ribonuclease H2 subunit C [Rana temporaria]	RNASEH2C	1	137	37	28	0	29	25	31	0.182482
199	XP_040184833.1	crossover junction endonuclease MUS81 isoform X1 [Rana temporaria]	MUS81	2	604	0	0	0	17	10	10	0.0102097
200	XP_040184882.1	metastasis-associated protein MTA2 [Rana temporaria]	MTA2	1	670	82	194	113	122	114	117	0.184577
201	XP_040184926.1	heterogeneous nuclear ribonucleoprotein U-like protein 2 [Rana temporaria]	HNRNPUL2	1	707	37	170	152	151	80	93	0.161009
202	XP_040184938.1	peroxiredoxin-5, mitochondrial [Rana temporaria]	PRDX5	1	189	67	80	78	38	24	45	0.292769
203	XP_040184977.1	stress-induced-phosphoprotein 1 [Rana temporaria]	STIP1	1	543	8	37	22	24	9	14	0.0349908
204	XP_040184983.1	ubiquitin thioesterase OTUB1 [Rana temporaria]	OTUB1	1	267	6	14	8	0	7	0	0.0218477
205	XP_040185097.1	PSME3-interacting protein [Rana temporaria]	PSME3IP1	2	249	23	41	33	74	52	62	0.190763
206	XP_040185123.1	H/ACA ribonucleoprotein complex subunit 1 [Rana temporaria]	GAR1	1	232	0	35	28	0	7	0	0.0502874
207	XP_040185151.1	U3 small nucleolar RNA-associated protein 4 homolog [Rana temporaria]	UTP4	1	686	0	44	81	17	29	8	0.0434888
208	XP_040185152.1	chromosome transmission fidelity protein 8 homolog [Rana temporaria]	CHTF8	1	118	0	7	0	8	0	11	0.0367232
209	XP_040185160.1	anillin-like isoform X1 [Rana temporaria]	ANLN	4	841	0	44	9	119	71	66	0.0612366
210	XP_040185169.1	U3 small nucleolar RNA-associated protein 6 homolog [Rana temporaria]	UTP6	1	595	0	21	47	15	11	9	0.0288515
211	XP_040185215.1	casein kinase II subunit alpha' [Rana temporaria]		2	349	0	52	49	18	22	0	0.0673352
212	XP_040185227.1	aspartate aminotransferase, mitochondrial [Rana temporaria]	GOT2	1	422	0	7	0	17	7	0	0.0122433
213	XP_040185255.1	splicing factor 3B subunit 3 [Rana temporaria]	SF3B3	4	1217	45	109	74	90	70	58	0.0610792
214	XP_040185269.1	SUMO-activating enzyme subunit 2 [Rana temporaria]	UBA2	1	641	164	186	79	66	86	86	0.173427
215	XP_040185306.1	zinc finger CCCH domain-containing protein 18 isoform X1 [Rana temporaria]	ZC3H18	3	1206	0	16	0	8	7	7	0.00525152
216	XP_040185364.1	glucose-6-phosphate isomerase [Rana temporaria]	GPI	1	553	25	86	22	0	0	0	0.0400844
217	XP_040185381.1	5,6-dihydroxyindole-2-carboxylic acid oxidase-like [Rana temporaria]	TYRP1	3	533	0	24	9	16	0	0	0.0153221
218	XP_040185403.1	borealin-2-like isoform X1 [Rana temporaria]	CDCA9	2	282	0	37	10	14	13	12	0.0508274
219	XP_040185409.1	programmed cell death protein 5 [Rana temporaria]	PDCD5	1	126	0	9	0	8	0	9	0.0343915
220	XP_040185476.1	pre-mRNA-splicing factor ATP-dependent RNA helicase PRP16 isoform X1 [Rana temporaria]	DHX38	2	1230	0	12	11	13	0	9	0.00609756
221	XP_040185484.1	26S proteasome non-ATPase regulatory subunit 7 [Rana temporaria]	PSMD7	1	323	26	67	27	13	28	26	0.0964912
222	XP_040185542.1	60S ribosome subunit biogenesis protein NIP7 homolog [Rana temporaria]	NIP7	1	216	0	31	29	34	37	37	0.12963
223	XP_040185554.1	60S ribosomal protein L13 [Rana temporaria]	RPL13	2	211	10	17	20	29	32	8	0.0916272
224	XP_040185573.1	Fanconi anemia group A protein isoform X1 [Rana temporaria]	FANCA	3	1422	0	12	10	360	253	140	0.0908345
225	XP_040185628.1	proteasome subunit beta type-3 [Rana temporaria]	PSMB3	1	205	43	67	62	18	18	28	0.19187
226	XP_040185639.1	inorganic pyrophosphatase 2, mitochondrial isoform X1 [Rana temporaria]	PPA2	2	336	39	88	37	6	0	0	0.0843254
227	XP_040185647.1	pre-mRNA-processing factor 6 [Rana temporaria]	PRPF6	1	972	0	41	19	23	35	23	0.024177
228	XP_040185707.1	nucleolar protein 11 [Rana temporaria]	NOL11	1	710	0	131	108	31	33	26	0.07723
229	XP_040185709.1	60S ribosomal protein L23 [Rana temporaria]	RPL23	1	140	11	26	29	30	30	23	0.177381
230	XP_040185737.1	60S ribosomal protein L35-like [Rana temporaria]	RPL35	2	123	17	36	17	48	16	20	0.208672
231	XP_040185812.1	3-hydroxybutyrate dehydrogenase type 2 [Rana temporaria]	BDH2	2	245	22	32	26	8	0	8	0.0653061
232	XP_040186012.1	jupiter microtubule associated homolog 1 [Rana temporaria]	JPT1	1	144	38	24	0	0	0	8	0.0810185
233	XP_040186016.1	small ubiquitin-related modifier 2 [Rana temporaria]	SUMO2	3	95	33	75	67	17	20	17	0.401754
234	XP_040186039.1	serine/arginine-rich splicing factor 2 isoform X1 [Rana temporaria]	SRSF2	3	225	46	36	29	32	16	15	0.128889
235	XP_040186130.1	nuclear receptor coactivator 5 isoform X1 [Rana temporaria]		4	735	0	65	75	89	54	39	0.0730159
236	XP_040186261.1	annexin A5 [Rana temporaria]	ANXA5	1	321	88	123	92	9	0	19	0.171859
237	XP_040186319.1	adenosylhomocysteinase [Rana temporaria]	AHCY-B	1	433	166	76	40	0	0	0	0.108545
238	XP_040186364.1	dnaJ homolog subfamily C member 7 isoform X1 [Rana temporaria]	DNAJC7	2	506	0	0	0	45	60	59	0.0540184
239	XP_040186503.1	regulation of nuclear pre-mRNA domain-containing protein 1B isoform X1 [Rana temporaria]	RPRD1B	2	359	0	0	0	25	15	8	0.0222841
240	XP_040186506.1	beta-catenin-like protein 1 [Rana temporaria]	CTNNBL1	1	556	13	38	64	69	55	51	0.0869305
241	XP_040186533.1	deoxynucleoside triphosphate triphosphohydrolase SAMHD1 [Rana temporaria]	SAMHD1	1	633	13	8	0	6	0	0	0.007109
242	XP_040186550.1	copine-1 isoform X1 [Rana temporaria]	CPNE1	11	533	0	29	15	9	10	9	0.0225141
243	XP_040186559.1	RNA-binding protein 39 isoform X1 [Rana temporaria]	RBM39	9	557	0	0	15	39	6	17	0.0230401
244	XP_040186630.1	nucleolar transcription factor 1 [Rana temporaria]	UBTF-B	4	693	9	99	68	104	84	63	0.102694
245	XP_040186730.1	centromere protein X [Rana temporaria]	CENPX	1	87	0	19	40	54	56	34	0.388889
246	XP_040186827.1	luc7-like protein 3 isoform X1 [Rana temporaria]	LUC7L3	2	449	7	15	0	0	0	10	0.0118782
247	XP_040186867.1	SAP30-binding protein isoform X1 [Rana temporaria]	SAP30BP	4	301	0	0	0	21	15	19	0.030454
248	XP_040186885.1	Fanconi anemia core complex-associated protein 100 [Rana temporaria]	FAAP100	2	816	0	0	0	120	108	47	0.0561683
249	XP_040186902.1	nuclear protein localization protein 4 homolog [Rana temporaria]	NPLOC4	1	611	0	31	0	104	108	99	0.0932897
250	XP_040186919.1	60S ribosomal protein L38 [Rana temporaria]	RPL38	1	70	0	0	0	38	37	39	0.271429
251	XP_040186943.1	DNA topoisomerase 2-alpha isoform X1 [Rana temporaria]	TOP2A	2	1614	0	468	456	237	449	347	0.202086
252	XP_040186951.1	activity-dependent neuroprotector homeobox protein isoform X1 [Rana temporaria]	ADNP	4	1120	0	19	17	28	18	17	0.0147321
253	XP_040187022.1	probable ATP-dependent RNA helicase DDX5 [Rana temporaria]	DDX5	1	601	197	493	491	460	326	366	0.646977
254	XP_040187071.1	nuclear distribution protein nudE-like 1 isoform X1 [Rana temporaria]	NDEL1-A	4	345	0	12	9	11	0	9	0.0198068
255	XP_040187092.1	zinc phosphodiesterase ELAC protein 2 isoform X1 [Rana temporaria]	ELAC2	2	814	36	10	0	18	8	7	0.0161753
256	XP_040187143.1	proteasome activator complex subunit 3 [Rana temporaria]	PSME3	1	254	31	115	44	54	41	53	0.221785
257	XP_040187201.1	proteasomal ubiquitin receptor ADRM1 isoform X1 [Rana temporaria]	ADRM1	2	444	25	32	21	12	0	0	0.0337838
258	XP_040187243.1	ATP-dependent RNA helicase DDX42 isoform X1 [Rana temporaria]	DDX42	3	975	8	73	61	151	105	160	0.0953846
259	XP_040187287.1	26S proteasome regulatory subunit 8 isoform X1 [Rana temporaria]	PSMC5	2	416	39	64	56	0	0	0	0.0637019
260	XP_040187291.1	mediator of RNA polymerase II transcription subunit 24 [Rana temporaria]	MED24	2	986	0	0	8	0	30	16	0.00912779
261	XP_040187355.1	casein kinase II subunit alpha isoform X1 [Rana temporaria]	CSNK2A1	5	404	60	91	74	72	44	9	0.144389
262	XP_040187359.1	eukaryotic translation initiation factor 1 [Rana temporaria]	EIF1	1	113	0	7	0	7	10	13	0.0545723
263	XP_040187364.1	116 kDa U5 small nuclear ribonucleoprotein component [Rana temporaria]	EFTUD2	2	974	22	83	54	42	31	16	0.0424367
264	XP_040187404.1	26S proteasome non-ATPase regulatory subunit 3 [Rana temporaria]	PSMD3	1	502	25	60	72	20	9	0	0.061753
265	XP_040187425.1	microtubule-associated protein RP/EB family member 1 isoform X1 [Rana temporaria]	MAPRE1	5	292	18	0	0	8	0	24	0.0285388
266	XP_040187444.1	SWI/SNF-related matrix-associated actin-dependent regulator of chromatin subfamily A member 5 [Rana temporaria]	SMARCA5	1	1036	70	128	97	166	126	95	0.109717
267	XP_040187527.1	proteasome subunit alpha type-7 [Rana temporaria]	PSMA7-A	1	249	195	106	99	46	25	23	0.330656
268	XP_040187536.1	26S proteasome non-ATPase regulatory subunit 11 [Rana temporaria]	PSMD11	1	422	20	49	15	10	9	8	0.0438389
269	XP_040187554.1	probable aminopeptidase NPEPL1 [Rana temporaria]	NPEPL1	1	521	27	110	39	15	0	0	0.0611004
270	XP_040187566.1	cyclin-dependent kinase 12 isoform X1 [Rana temporaria]	CDK12	7	1463	0	0	13	20	33	27	0.0105947
271	XP_040187638.1	60S ribosomal protein L19 [Rana temporaria]	RPL19	2	197	0	24	47	8	0	16	0.0803723
272	XP_040187648.1	homologous recombination OB-fold protein [Rana temporaria]	HROB	1	642	0	0	0	39	38	29	0.0275182
273	XP_040187699.1	26S proteasome non-ATPase regulatory subunit 12 [Rana temporaria]	PSMD12	1	455	0	33	15	11	0	0	0.0216117
274	XP_040187774.1	NSFL1 cofactor p47 [Rana temporaria]	NSFL1C	1	370	104	74	58	54	85	78	0.204054
275	XP_040187856.1	Protein S100-A11	S100A11	6	217	51	59	66	57	119	53	0.31106
276	XP_040187883.1	tRNA (adenine(58)-N(1))-methyltransferase catalytic subunit TRMT61A [Rana temporaria]	TRMT61A	3	303	51	24	14	21	9	0	0.0654565
277	XP_040187892.1	meiotic nuclear division protein 1 homolog isoform X1 [Rana temporaria]	MND1	2	205	0	28	20	59	71	78	0.20813
278	XP_040187905.1	RNA-binding protein 25 isoform X1 [Rana temporaria]	RBM25	3	833	6	67	68	236	153	133	0.132653
279	XP_040187947.1	olfactory receptor 2G3-like [Rana temporaria]	OR5V1	1	365	11	13	11	0	0	0	0.0159817
280	XP_040188068.1	signal recognition particle 14 kDa protein [Rana temporaria]	SRP14	1	110	0	9	11	10	0	0	0.0454545
281	XP_040188087.1	nucleolar protein 56 [Rana temporaria]	NOP56	1	576	0	100	106	126	123	85	0.15625
282	XP_040188116.1	ubiquilin-4 [Rana temporaria]	UBQLN4	5	590	60	35	38	18	0	0	0.0426554
283	XP_040188196.1	RNA helicase aquarius isoform X1 [Rana temporaria]	AQR	2	1639	109	138	68	80	90	51	0.0545048
284	XP_040188240.1	Myosin light chain kinase, smooth muscle	MYLK	7	2134	44	245	265	147	92	104	0.0700562
285	XP_040188306.1	peptidyl-prolyl cis-trans isomerase FKBP3 [Rana temporaria]	FKBP3	1	224	8	0	0	10	11	10	0.0290179
286	XP_040188307.1	peptidyl-prolyl cis-trans isomerase D [Rana temporaria]	PPID	1	370	10	11	18	0	22	25	0.0387387
287	XP_040188308.1	Fanconi anemia group M protein [Rana temporaria]	FANCM	1	2062	0	0	10	164	94	59	0.0264306
288	XP_040188325.1	proteasome subunit beta type-4 [Rana temporaria]	PSMB4	1	250	57	79	47	31	18	22	0.169333
289	XP_040188340.1	apoptosis regulatory protein Siva isoform X1 [Rana temporaria]	SIVA1	3	164	24	42	29	52	31	68	0.25
290	XP_040188375.1	pogo transposable element with ZNF domain isoform X1 [Rana temporaria]	POGZ	2	1330	0	13	0	20	13	8	0.00676692
291	XP_040188525.1	Serine protease inhibitor A6	SERPINA6	3	902	0	30	26	11	0	18	0.0157058
292	XP_040188540.1	cyclin-K [Rana temporaria]	CCNK	1	587	0	10	11	8	0	11	0.0113572
293	XP_040188584.1	nucleolar protein 9 [Rana temporaria]	NOP9	1	634	0	0	30	36	29	0	0.0249737
294	XP_040188643.1	nucleolar and spindle-associated protein 1 [Rana temporaria]	NUSAP1-B	1	419	0	42	41	20	19	27	0.0592681
295	XP_040188705.1	serine/arginine-rich splicing factor 5-like isoform X1 [Rana temporaria]	SRSF4	3	262	25	28	19	23	0	0	0.0604326
296	XP_040188724.1	integrator complex subunit 3 isoform X1 [Rana temporaria]	INTS3	2	1049	0	0	0	28	75	22	0.0198602
297	XP_040188741.1	interleukin enhancer-binding factor 2 [Rana temporaria]	ILF2	1	388	125	172	150	172	82	120	0.352663
298	XP_040188813.1	double-stranded RNA-specific adenosine deaminase [Rana temporaria]	ADAR	1	1133	6	53	37	10	18	18	0.0208885
299	XP_040188969.1	26S proteasome regulatory subunit 10B [Rana temporaria]	PSMC6	1	403	49	76	40	12	12	13	0.0835401
300	XP_040189076.1	galectin-3 [Rana temporaria]	LGALS3	1	322	45	81	51	23	49	54	0.156832
301	XP_040189101.1	CDK-activating kinase assembly factor MAT1 [Rana temporaria]	MNAT1	1	307	0	35	35	34	65	44	0.115635
302	XP_040189116.1	YLP motif-containing protein 1 isoform X1 [Rana temporaria]	YLPM1	4	2955	0	19	13	40	36	67	0.00987028
303	XP_040189140.1	histone PARylation factor 1 isoform X2 [Rana temporaria]	HPF1	3	360	35	27	16	22	42	61	0.0939815
304	XP_040189141.1	Serine/threonine-protein kinase VRK1	VRK1	1	207	0	29	39	61	51	32	0.170692
305	XP_040189156.1	creatine kinase B-type [Rana temporaria]	CKB	1	381	39	29	32	10	11	15	0.0594926
306	XP_040189160.1	serine/arginine-rich splicing factor 5 isoform X1 [Rana temporaria]	SRSF5	3	289	68	77	71	48	10	25	0.172434
307	XP_040189311.1	high mobility group protein B2 [Rana temporaria]	HMGB2	1	212	231	280	199	347	397	349	1.41745
308	XP_040189412.1	tyrosyl-DNA phosphodiesterase 1 [Rana temporaria]	TDP1	1	600	0	30	28	16	29	13	0.0322222
309	XP_040189442.1	adenylosuccinate synthetase isozyme 1 [Rana temporaria]	ADSS1	1	451	168	192	179	130	104	129	0.333333
310	XP_040189563.1	U4/U6 small nuclear ribonucleoprotein Prp3 [Rana temporaria]	PRPF3	1	680	0	37	39	34	45	42	0.0482843
311	XP_040189567.1	WD repeat and HMG-box DNA-binding protein 1 isoform X2 [Rana temporaria]	WDHD1	2	1125	19	154	105	281	116	115	0.117037
312	XP_040189789.1	proteasome subunit alpha type-3 [Rana temporaria]	PSMA3	2	255	64	91	85	45	0	28	0.204575
313	XP_040189796.1	RNA transcription, translation and transport factor protein isoform X1 [Rana temporaria]	RTRAF	2	240	6	69	48	17	31	14	0.128472
314	XP_040189870.1	DNA-directed RNA polymerase III subunit RPC3 isoform X1 [Rana temporaria]	POLR3C	3	534	7	0	9	15	0	0	0.00967541
315	XP_040189977.1	centromere protein U isoform X1 [Rana temporaria]	CENPU	6	429	0	15	16	12	0	0	0.0167055
316	XP_040190114.1	ATP-dependent DNA helicase Q4 isoform X1 [Rana temporaria]	RECQL4	4	1460	0	17	37	24	28	0	0.0121005
317	XP_040190145.1	DNA-directed RNA polymerase II subunit RPB1 [Rana temporaria]	POLR2A	1	1968	0	49	19	0	0	8	0.00643631
318	XP_040190289.1	ribosome biogenesis protein BOP1 [Rana temporaria]	BOP1-B	1	209	0	16	7	0	20	19	0.0494418
319	XP_040190385.1	Thioredoxin domain-containing protein 2	TXNDC2	1	1452	0	32	10	11	0	9	0.00711662
320	XP_040190389.1	chromosome-associated kinesin KIF4A [Rana temporaria]	KIF4	1	1232	0	7	15	34	63	64	0.0247565
321	XP_040190396.1	DNA-directed RNA polymerase I subunit RPA34 [Rana temporaria]	POLR1G	1	173	10	19	23	8	0	0	0.0578035
322	XP_040190428.1	proteasome subunit alpha type-1 [Rana temporaria]	PSMA1	1	261	134	146	160	44	0	10	0.315453
323	XP_040190431.1	40S ribosomal protein S13 [Rana temporaria]	RPS13	1	151	0	0	11	11	11	0	0.0364238
324	XP_040190437.1	general transcription factor IIE subunit 1-like [Rana temporaria]	GTF2E1	1	425	14	15	19	0	14	13	0.0294118
325	XP_040190442.1	coilin isoform X1 [Rana temporaria]	COIL	2	778	26	214	168	329	0	0	0.157883
326	XP_040190556.1	acyl-CoA-binding protein isoform X8 [Rana temporaria]	DBI	8	87	24	9	8	0	0	0	0.0785441
327	XP_040190586.1	histone H2A type 1 [Rana temporaria]	H2A	18	130	59	36	29	25	24	24	0.252564
328	XP_040190753.1	target of EGR1 protein 1-like [Rana temporaria]	TOE1	2	592	0	45	44	21	12	10	0.0371622
329	XP_040190788.1	ATP-dependent RNA helicase DDX24 isoform X1 [Rana temporaria]	DDX24	2	835	0	30	27	6	33	35	0.0261477
330	XP_040190803.1	E3 ubiquitin-protein ligase BRE1B isoform X1 [Rana temporaria]	RNF40	5	978	7	7	0	65	46	31	0.0265849
331	XP_040190981.1	ubiquitin carboxyl-terminal hydrolase isozyme L1 [Rana temporaria]	UCHL1	1	221	197	242	293	150	131	146	0.874057
332	XP_040191014.1	sister chromatid cohesion protein PDS5 homolog A isoform X1 [Rana temporaria]	PDS5A-A	7	1413	0	75	60	38	62	60	0.0347959
333	XP_040191052.1	UDP-glucose 6-dehydrogenase [Rana temporaria]	UGDH	1	494	7	65	30	72	54	34	0.0883941
334	XP_040191055.1	60S ribosomal protein L9 [Rana temporaria]	RPL9	2	192	0	10	0	27	25	24	0.0746528
335	XP_040191057.1	replication factor C subunit 1 isoform X1 [Rana temporaria]	RFC1	2	1172	20	212	241	379	267	217	0.189989
336	XP_040191117.1	pre-mRNA-splicing factor ATP-dependent RNA helicase DHX15 isoform X1 [Rana temporaria]	DHX15	6	757	70	190	145	208	173	119	0.199251
337	XP_040191174.1	DNA-directed RNA polymerase I subunit RPA1 [Rana temporaria]	POLR1A	1	1696	0	99	92	58	36	12	0.0291863
338	XP_040191353.1	cell growth-regulating nucleolar protein [Rana temporaria]	LYAR	2	360	0	77	55	9	0	0	0.0652778
339	XP_040191369.1	biorientation of chromosomes in cell division protein 1-like 1 isoform X1 [Rana temporaria]	BOD1L1	4	3289	0	417	114	95	57	103	0.0398297
340	XP_040191396.1	fatty acid-binding protein 1, liver-like [Rana temporaria]		1	127	49	21	0	10	0	0	0.104987
341	XP_040191466.1	nucleolar protein 8 isoform X1 [Rana temporaria]	NOL8	3	1182	0	27	61	9	14	0	0.0156514
342	XP_040191476.1	zinc finger protein 638 isoform X1 [Rana temporaria]	ZNF638	5	2288	0	82	47	25	0	0	0.0112179
343	XP_040191523.1	T-complex protein 1 subunit eta [Rana temporaria]	CCT7	1	541	10	20	16	24	22	16	0.0332717
344	XP_040191965.1	transitional endoplasmic reticulum ATPase [Rana temporaria]	VCP	1	805	731	834	548	237	161	175	0.556108
345	XP_040192182.1	cullin-4A [Rana temporaria]	CUL4A	3	749	0	24	23	34	19	15	0.0255897
346	XP_040192372.1	60S ribosomal protein L31 [Rana temporaria]	RPL31	2	125	0	48	53	28	15	36	0.24
347	XP_040192383.1	60S ribosomal protein L17 [Rana temporaria]	RPL17	2	184	0	24	29	34	29	13	0.116848
348	XP_040192638.1	replication factor C subunit 2 [Rana temporaria]	RFC2	1	349	66	261	191	201	257	151	0.538204
349	XP_040192639.1	eukaryotic translation initiation factor 4H isoform X1 [Rana temporaria]	EIF4H	2	256	73	13	8	15	18	27	0.10026
350	XP_040192641.1	myb-binding protein 1A [Rana temporaria]	MYBBP1A	1	1273	0	72	103	35	77	44	0.043336
351	XP_040192710.1	DNA ligase 3 [Rana temporaria]	LIG3	1	987	0	46	11	17	37	0	0.0187437
352	XP_040192781.1	TATA-binding protein-associated factor 2N-like isoform X2 [Rana temporaria]	TAF15	2	375	56	93	59	102	83	36	0.190667
353	XP_040192789.1	malate dehydrogenase, mitochondrial [Rana temporaria]	MDH2	1	338	0	35	25	29	9	0	0.0483235
354	XP_040192808.1	histone-binding protein RBBP7 [Rana temporaria]	RBBP7	3	420	243	321	227	155	96	158	0.47619
355	XP_040192840.1	notchless protein homolog 1 [Rana temporaria]	NLE1	1	476	0	40	38	21	41	22	0.0567227
356	XP_040192882.1	probable ATP-dependent RNA helicase DHX40 [Rana temporaria]	DHX40	2	740	0	11	10	43	19	29	0.0252252
357	XP_040192888.1	peptidyl-prolyl cis-trans isomerase E [Rana temporaria]	PPIE	1	301	42	37	21	33	0	0	0.0736434
358	XP_040192909.1	elongation factor 1-alpha, oocyte form [Rana temporaria]	EEF1AO	3	461	0	0	0	13	15	19	0.016992
359	XP_040192985.1	KH domain-containing, RNA-binding, signal transduction-associated protein 1 isoform X1 [Rana temporaria]	KHDRBS1	3	352	0	8	0	23	13	13	0.0269886
360	XP_040193023.1	U3 small nucleolar ribonucleoprotein protein IMP3 [Rana temporaria]	IMP3	1	183	0	14	8	14	15	8	0.0537341
361	XP_040193079.1	serine/arginine repetitive matrix protein 1 isoform X1 [Rana temporaria]	SRRM1	10	924	0	28	21	27	9	23	0.0194805
362	XP_040193135.1	probable U3 small nucleolar RNA-associated protein 11 [Rana temporaria]	UTP11	1	253	0	18	12	7	9	8	0.0355731
363	XP_040193144.1	splicing factor 3A subunit 3 [Rana temporaria]	SF3A3	1	500	0	42	0	86	72	73	0.091
364	XP_040193153.1	nucleolar GTP-binding protein 2 [Rana temporaria]	GNL2	1	712	0	36	76	157	130	108	0.11868
365	XP_040193247.1	proteasome subunit beta type-2 [Rana temporaria]	PSMB2	1	199	111	78	41	31	26	20	0.257119
366	XP_040193305.1	serine/arginine-rich splicing factor 3 isoform X1 [Rana temporaria]	SRSF3	4	173	28	15	16	24	0	0	0.0799615
367	XP_040193374.1	pre-mRNA-splicing factor SPF27 [Rana temporaria]	BCAS2	1	223	0	50	45	53	0	10	0.118087
368	XP_040193388.1	thioredoxin-like protein 1 [Rana temporaria]	TXNL1	1	289	43	41	21	0	5	0	0.0634371
369	XP_040193569.1	glutathione S-transferase Mu 4 [Rana temporaria]	GSTM5	1	218	15	85	22	0	8	0	0.0993884
370	XP_040193584.1	proteasome subunit alpha type-5 [Rana temporaria]	PSMA5	1	241	117	104	70	65	41	44	0.304979
371	XP_040193630.1	bystin [Rana temporaria]	BYSL	1	434	7	19	39	28	31	26	0.0576037
372	XP_040193645.1	stathmin isoform X1 [Rana temporaria]	STMN1-A	3	174	18	23	11	0	0	0	0.0498084
373	XP_040193660.1	cysteine and glycine-rich protein 1 [Rana temporaria]	CSRP1	1	192	57	34	22	8	29	26	0.152778
374	XP_040193703.1	sister chromatid cohesion protein DCC1 [Rana temporaria]	DSCC1	1	390	7	17	6	16	0	10	0.0239316
375	XP_040193704.1	60S ribosomal protein L10a [Rana temporaria]	RPL10A	1	217	0	32	65	111	65	36	0.237327
376	XP_040193735.1	Fanconi anemia group E protein [Rana temporaria]	FANCE	2	478	0	0	0	25	42	11	0.0271967
377	XP_040193736.1	40S ribosomal protein S10 [Rana temporaria]	RPS10	2	166	0	0	10	11	12	10	0.0431727
378	XP_040193759.1	protein AATF [Rana temporaria]	AATF	1	513	0	111	67	15	0	0	0.0627031
379	XP_040193780.1	serine/arginine-rich splicing factor 1 [Rana temporaria]	SRSF1	1	275	0	34	19	16	0	0	0.0418182
380	XP_040193806.1	aminopeptidase B [Rana temporaria]	RNPEP	1	617	33	36	11	0	0	0	0.0216099
381	XP_040193861.1	fatty acid-binding protein, heart-like [Rana temporaria]	FABP3	1	132	62	35	17	32	30	45	0.27904
382	XP_040193950.1	activated RNA polymerase II transcriptional coactivator p15 [Rana temporaria]	SUB1	2	129	343	113	67	26	30	15	0.767442
383	XP_040193969.1	dnaJ homolog subfamily C member 8 isoform X1 [Rana temporaria]	DNAJC8	2	251	0	0	10	32	20	0	0.0411687
384	XP_040193978.1	replication protein A 32 kDa subunit [Rana temporaria]	RPA2-B	1	280	112	167	76	117	138	127	0.43869
385	XP_040194030.1	60S ribosomal protein L8 [Rana temporaria]	RPL8	2	257	0	17	0	27	12	9	0.042153
386	XP_040194036.1	mediator of RNA polymerase II transcription subunit 14 isoform X1 [Rana temporaria]	MED14	5	1447	0	0	8	36	27	19	0.0103663
387	XP_040194145.1	ribosome biogenesis protein BRX1 homolog [Rana temporaria]	BRIX1	1	347	0	45	77	47	93	61	0.155139
388	XP_040194306.1	replication protein A 70 kDa DNA-binding subunit [Rana temporaria]	RPA1	1	612	266	335	257	296	380	461	0.543301
389	XP_040194317.1	pre-mRNA-processing-splicing factor 8 [Rana temporaria]	PRPF8	1	2335	0	21	37	23	0	0	0.00578158
390	XP_040194334.1	14-3-3 protein epsilon isoform X1 [Rana temporaria]	YWHAE	9	255	105	63	53	10	0	0	0.15098
391	XP_040194412.1	thioredoxin domain-containing protein 17 [Rana temporaria]	TXNDC17	1	123	25	23	20	0	0	0	0.0921409
392	XP_040194443.1	fructose-bisphosphate aldolase C [Rana temporaria]	ALDOC	1	364	0	92	17	19	0	0	0.0586081
393	XP_040194450.1	transcription elongation factor SPT6 [Rana temporaria]	SUPT6H	1	1740	8	6	0	9	11	8	0.00402299
394	XP_040194459.1	WD repeat-containing protein 70 [Rana temporaria]	WDR70	2	608	0	22	7	37	64	40	0.0466009
395	XP_040194464.1	protein FAM222B [Rana temporaria]	FAM222B	2	629	0	0	0	11	7	16	0.00900901
396	XP_040194504.1	nuclear speckle splicing regulatory protein 1 isoform X1 [Rana temporaria]	NSRP1	2	588	25	50	45	73	20	21	0.0663265
397	XP_040194559.1	polyubiquitin-C isoform X1 [Rana temporaria]	UBQ-1	8	837	42	16	9	18	20	24	0.025687
398	XP_040194610.1	Fanconi anemia group B protein [Rana temporaria]	FANCB	2	856	0	9	18	210	153	96	0.0946262
399	XP_040194624.1	histone H2A, sperm-like [Rana temporaria]	H2AX	2	138	25	61	42	26	43	34	0.278986
400	XP_040194630.1	protein CMSS1 [Rana temporaria]	CMSS1	1	279	0	0	9	19	10	11	0.0292712
401	XP_040194800.1	superoxide dismutase [Cu-Zn] [Rana temporaria]	SOD1	1	150	140	111	97	23	0	0	0.412222
402	XP_040194805.1	nucleolar pre-ribosomal-associated protein 1 isoform X1 [Rana temporaria]	URB1	2	2358	0	200	282	183	287	64	0.0718123
403	XP_040194853.1	protein SON isoform X1 [Rana temporaria]	SON	12	5370	0	19	6	0	0	10	0.00108628
404	XP_040194889.1	chromatin assembly factor 1 subunit B [Rana temporaria]	CHAF1B	2	581	15	44	12	8	36	17	0.0378657
405	XP_040195067.1	cystatin-A-like [Rana temporaria]		3	140	112	134	49	11	16	13	0.39881
406	XP_040195098.1	cystatin-B-like [Rana temporaria]	CSTB	1	101	33	17	18	9	14	7	0.161716
407	XP_040195248.1	zinc finger RNA-binding protein 2 [Rana temporaria]	ZFR	1	1002	0	285	234	27	15	7	0.0944777
408	XP_040195384.1	exosome RNA helicase MTR4 [Rana temporaria]	MTREX	1	1031	0	14	30	0	0	9	0.00856773
409	XP_040195610.1	cactin-like [Rana temporaria]	CACTIN	1	620	0	15	6	9	35	23	0.0236559
410	XP_040195724.1	DNA polymerase delta subunit 3 isoform X1 [Rana temporaria]	POLD3	3	471	48	162	67	90	44	75	0.171975
411	XP_040195852.1	HEAT repeat-containing protein 1 [Rana temporaria]	HEATR1	1	2143	9	145	173	72	156	79	0.0493078
412	XP_040195881.1	integrator complex subunit 4 [Rana temporaria]	INTS4	1	971	9	0	0	102	106	83	0.0514933
413	XP_040196095.1	double-strand break repair protein MRE11 [Rana temporaria]	MRE11	1	711	27	159	277	712	980	797	0.691983
414	XP_040196161.1	DCN1-like protein 5 [Rana temporaria]	DCUN1D5	1	230	0	22	0	8	14	0	0.0318841
415	XP_040196194.1	spliceosome-associated protein CWC27 homolog [Rana temporaria]	CWC27	1	476	8	13	11	19	18	18	0.0304622
416	XP_040196230.1	neurofilament heavy polypeptide-like isoform X1 [Rana temporaria]	PHF6	3	694	30	152	131	37	10	0	0.0864553
417	XP_040196257.1	ribonuclease H2 subunit B isoform X1 [Rana temporaria]	RNASEH2B	2	305	71	72	27	54	65	49	0.184699
418	XP_040196263.1	integrator complex subunit 6 isoform X1 [Rana temporaria]	INTS6-A	2	882	0	0	0	17	26	11	0.0102041
419	XP_040196324.1	chromatin assembly factor 1 subunit A-B-like [Rana temporaria]	CHAF1A-A	1	332	0	11	13	0	7	6	0.0185743
420	XP_040196351.1	replication factor C subunit 3 [Rana temporaria]	RFC3	1	356	63	193	216	257	273	242	0.582397
421	XP_040196420.1	60S ribosomal protein L21 [Rana temporaria]	RPL21	4	160	26	32	29	23	28	15	0.159375
422	XP_040196455.1	cyclin-dependent kinase 7 isoform X1 [Rana temporaria]	CDK7	2	392	20	9	11	8	45	9	0.0433673
423	XP_040196503.1	probable ATP-dependent RNA helicase DDX10 [Rana temporaria]	DDX10	1	940	0	18	29	8	31	15	0.0179078
424	XP_040196511.1	serine-protein kinase ATM isoform X1 [Rana temporaria]	ATM	2	3060	0	20	37	949	1519	1264	0.206373
425	XP_040196531.1	hydroperoxide isomerase ALOXE3-like [Rana temporaria]	ALOXE3	1	671	24	20	18	17	0	0	0.0196225
426	XP_040196533.1	poly(A) RNA polymerase GLD2 isoform X1 [Rana temporaria]	TENT2-B	2	487	0	0	0	14	13	13	0.0136893
427	XP_040196623.1	MYG1 exonuclease [Rana temporaria]	MYG1	1	369	58	51	12	10	0	9	0.063234
428	XP_040196636.1	poly(rC)-binding protein 2 isoform X1 [Rana temporaria]	PCBP2	5	461	0	23	19	19	16	19	0.0347072
429	XP_040196676.1	heterogeneous nuclear ribonucleoprotein A1 isoform X1 [Rana temporaria]	HNRNPA1	2	384	24	57	53	79	0	43	0.111111
430	XP_040196726.1	general transcription factor IIH subunit 4 isoform X1 [Rana temporaria]	GTF2H4	3	455	0	23	22	31	72	46	0.0710623
431	XP_040196918.1	DNA primase small subunit [Rana temporaria]	PRIM1	1	416	23	39	10	36	43	39	0.0761218
432	XP_040196965.1	ATP synthase subunit beta, mitochondrial [Rana temporaria]	ATP5F1B	1	522	0	24	35	36	33	58	0.059387
433	XP_040196981.1	protein timeless homolog [Rana temporaria]	TIMELESS	2	1276	22	47	23	38	40	26	0.0256008
434	XP_040197123.1	probable ATP-dependent RNA helicase DDX23 [Rana temporaria]	DDX23	1	792	0	18	28	15	0	0	0.0128367
435	XP_040197173.1	mediator of RNA polymerase II transcription subunit 4 [Rana temporaria]	MED4	1	252	0	8	16	9	21	19	0.0482804
436	XP_040197213.1	general transcription factor IIF subunit 2 [Rana temporaria]	GTF2F2	1	264	0	15	15	61	28	36	0.0978535
437	XP_040197316.1	ubiquitin carboxyl-terminal hydrolase isozyme L3 [Rana temporaria]	UCHL3	2	230	21	19	22	0	0	0	0.0449275
438	XP_040197367.1	ribosome biogenesis protein NSA2 homolog [Rana temporaria]	NSA2	1	260	0	32	31	71	74	69	0.177564
439	XP_040197380.1	U3 small nucleolar RNA-associated protein 15 homolog [Rana temporaria]	UTP15	1	523	8	54	75	14	0	0	0.0481198
440	XP_040197401.1	peptidyl-prolyl cis-trans isomerase-like [Rana temporaria]	CYP1	1	165	109	81	48	0	0	0	0.240404
441	XP_040197490.1	general transcription factor IIH subunit 2 [Rana temporaria]	GTF2H2	3	401	0	7	0	16	55	23	0.0419784
442	XP_040197507.1	cell cycle checkpoint protein RAD17 [Rana temporaria]	RAD17	1	675	0	0	0	30	25	20	0.0185185
443	XP_040197555.1	dihydrofolate reductase [Rana temporaria]	DHFR	1	189	11	0	0	21	28	27	0.0767196
444	XP_040197770.1	cyclin-H [Rana temporaria]	CCNH	1	323	0	0	9	27	21	9	0.0340557
445	XP_040198027.1	vitelline membrane outer layer protein 1-like [Rana temporaria]	VMO1	1	188	12	39	64	0	0	0	0.10195
446	XP_040198190.1	60S ribosomal protein L4 [Rana temporaria]	RPL4-B	1	399	28	95	104	86	103	65	0.200919
447	XP_040198194.1	RNA guanine-N7 methyltransferase activating subunit [Rana temporaria]	RAMAC	1	171	9	10	11	0	0	0	0.0292398
448	XP_040198211.1	integrator complex subunit 14 isoform X1 [Rana temporaria]	INTS14	3	543	0	22	21	53	72	37	0.062922
449	XP_040198249.1	U2 small nuclear ribonucleoprotein A' [Rana temporaria]	SNRPA1	1	259	0	17	18	28	17	17	0.0624196
450	XP_040198345.1	Fanconi anemia group I protein [Rana temporaria]	FANCI	1	1326	9	0	0	102	90	36	0.0297888
451	XP_040198591.1	myelin expression factor 2 [Rana temporaria]	MYEF2	1	607	92	136	122	117	47	48	0.154311
452	XP_040198643.1	cAMP-regulated phosphoprotein 19 [Rana temporaria]	ARPP19-A	2	118	50	9	12	0	9	20	0.141243
453	XP_040198751.1	U3 small nucleolar ribonucleoprotein protein MPP10 [Rana temporaria]	MPHOSPH10	1	697	0	56	51	24	29	0	0.0382592
454	XP_040198868.1	PCNA-associated factor [Rana temporaria]	PCLAF	1	130	232	109	33	73	22	30	0.639744
455	XP_040198913.1	paired amphipathic helix protein Sin3a isoform X1 [Rana temporaria]	SIN3A	7	1312	0	0	0	97	67	67	0.0293445
456	XP_040199140.1	inosine-5'-monophosphate dehydrogenase 1 isoform X4 [Rana temporaria]	IMPDH1	4	518	0	16	10	62	46	26	0.0514801
457	XP_040199149.1	RNA-binding protein 28 [Rana temporaria]	RBM28	1	828	0	74	131	17	74	29	0.0654187
458	XP_040199234.1	WD repeat-containing protein 36 [Rana temporaria]	WDR36	1	895	9	62	70	30	24	19	0.039851
459	XP_040199347.1	pre-mRNA-splicing factor 18 isoform X1 [Rana temporaria]	PRPF18	2	351	0	6	0	0	7	6	0.00902184
460	XP_040199422.1	26S proteasome regulatory subunit 7 [Rana temporaria]	PSMC2	1	435	41	59	33	7	16	17	0.0662835
461	XP_040199451.1	pseudouridylate synthase 7 homolog isoform X1 [Rana temporaria]	PUS7	4	659	44	49	0	0	9	26	0.0323723
462	XP_040199688.1	LSM8 homolog, U6 small nuclear RNA associated [Rana temporaria]	LSM8	1	96	29	25	21	12	18	19	0.215278
463	XP_040199835.1	protein SCAF11 isoform X1 [Rana temporaria]	SCAF11	4	1511	0	20	18	9	10	15	0.00794176
464	XP_040199892.1	cysteine and glycine-rich protein 2 [Rana temporaria]	CSRP2	1	193	0	24	38	9	0	0	0.0613126
465	XP_040199908.1	KRR1 small subunit processome component homolog [Rana temporaria]	KRR1	1	376	0	7	11	0	36	0	0.0239362
466	XP_040199954.1	T-complex protein 1 subunit beta [Rana temporaria]	CCT2	1	535	14	0	35	34	0	35	0.0367601
467	XP_040199981.1	cullin-associated NEDD8-dissociated protein 1 [Rana temporaria]	CAND1	1	1230	69	142	96	95	114	126	0.0869919
468	XP_040200028.1	protein LLP homolog [Rana temporaria]	LLPH	1	147	13	20	34	42	47	19	0.198413
469	XP_040200030.1	60S ribosomal protein L18a [Rana temporaria]	RPL18A	1	176	8	22	43	41	44	35	0.182765
470	XP_040200042.1	probable imidazolonepropionase [Rana temporaria]	AMDHD1	1	432	37	7	0	0	0	9	0.0204475
471	XP_040200063.1	ubiquitin-conjugating enzyme E2 N [Rana temporaria]	UBE2N	1	152	22	16	0	0	22	20	0.0877193
472	XP_040200065.1	serum response factor-binding protein 1 isoform X1 [Rana temporaria]	SRFBP1	2	587	0	5	17	9	0	9	0.0113572
473	XP_040200250.1	small subunit processome component 20 homolog [Rana temporaria]	UTP20	1	2767	0	42	85	0	23	17	0.010059
474	XP_040200278.1	lysine-specific demethylase 3B [Rana temporaria]	KDM3B	1	1704	0	16	0	81	83	43	0.0218114
475	XP_040200309.1	H/ACA ribonucleoprotein complex subunit 2 [Rana temporaria]	NHP2	1	156	16	56	49	21	55	14	0.225427
476	XP_040200374.1	drebrin isoform X2 [Rana temporaria]	DBN1	6	584	15	122	84	22	0	0	0.0693493
477	XP_040200397.1	nucleolar protein 16 [Rana temporaria]	NOP16	1	164	0	17	0	0	23	9	0.0497967
478	XP_040200480.1	60S ribosomal protein L26-like 1 [Rana temporaria]	RPL26	3	145	0	52	57	15	16	22	0.186207
479	XP_040200506.1	transcription elongation regulator 1 isoform X1 [Rana temporaria]	TCERG1	7	1130	14	27	8	132	99	89	0.0544248
480	XP_040200515.1	RNA-binding protein 27 isoform X1 [Rana temporaria]	RBM27	3	1032	0	0	0	19	12	14	0.00726744
481	XP_040200542.1	alpha-aminoadipic semialdehyde dehydrogenase [Rana temporaria]	ALDH7A1	1	539	0	32	15	0	0	8	0.0170068
482	XP_040200546.1	glucosamine-6-phosphate isomerase 1 isoform X2 [Rana temporaria]	GNPDA1	6	316	106	72	27	10	0	0	0.113397
483	XP_040200552.1	heat shock 70 kDa protein 4 [Rana temporaria]	HSPA4	1	838	73	175	98	0	0	0	0.0688146
484	XP_040200554.1	phosphorylated adapter RNA export protein [Rana temporaria]	PHAX	1	391	7	8	0	16	0	15	0.0196078
485	XP_040200615.1	protein Spindly isoform X1 [Rana temporaria]	SPDL1	3	601	0	0	0	91	31	41	0.0452024
486	XP_040200620.1	heterogeneous nuclear ribonucleoprotein H isoform X1 [Rana temporaria]	HNRNPH1	3	438	107	79	86	61	49	52	0.165145
487	XP_040200622.1	heterogeneous nuclear ribonucleoprotein A0 [Rana temporaria]	HNRNPA0	1	282	68	17	10	75	40	31	0.142435
488	XP_040200640.1	nucleophosmin [Rana temporaria]	NPM1	1	302	688	851	864	287	303	202	1.76325
489	XP_040200700.1	probable ATP-dependent RNA helicase DDX46 [Rana temporaria]	DDX46	1	1055	5	29	15	74	96	138	0.0563981
490	XP_040200714.1	S-phase kinase-associated protein 1 [Rana temporaria]	SKP1	3	163	24	19	7	16	17	10	0.095092
491	XP_040200718.1	serine/threonine-protein phosphatase 2A catalytic subunit alpha isoform isoform X1 [Rana temporaria]	PPP2CA	2	309	0	9	8	0	9	0	0.0140237
492	XP_040200992.1	histidine triad nucleotide-binding protein 1 [Rana temporaria]	HINT1	1	136	85	37	0	16	8	6	0.186275
493	XP_040201090.1	CWF19-like protein 1 isoform X1 [Rana temporaria]	CWF19L1	1	537	42	72	47	40	39	48	0.0893855
494	XP_040201129.1	periodic tryptophan protein 1 homolog [Rana temporaria]	PWP1	1	504	0	20	41	0	6	0	0.0221561
495	XP_040201531.1	integrator complex subunit 13 isoform X1 [Rana temporaria]	INTS13	2	707	0	9	0	53	34	15	0.0261669
496	XP_040201577.1	aldo-keto reductase family 1 member B1-like [Rana temporaria]	AKR1B1	2	318	0	35	0	0	13	17	0.0340671
497	XP_040201586.1	RNA-splicing ligase RtcB homolog [Rana temporaria]	RTCB	1	505	0	39	39	28	19	10	0.0445545
498	XP_040201588.1	F-box only protein 7 [Rana temporaria]	FBXO7	2	499	0	0	0	10	18	10	0.0126921
499	XP_040201703.1	phosphatidylethanolamine-binding protein 1-like [Rana temporaria]	PEBP1	1	186	29	36	29	0	0	0	0.0842294
500	XP_040201776.1	replication factor C subunit 5 [Rana temporaria]	RFC5	1	339	82	225	199	327	288	224	0.661259
501	XP_040201818.1	annexin A4 isoform X2 [Rana temporaria]	ANXA4	4	332	31	15	11	8	0	0	0.0326305
502	XP_040201868.1	U5 small nuclear ribonucleoprotein 200 kDa helicase [Rana temporaria]	SNRNP200	1	2134	0	73	64	105	61	25	0.025617
503	XP_040201906.1	U4/U6.U5 tri-snRNP-associated protein 2 [Rana temporaria]	USP39	1	497	0	14	17	11	7	7	0.0187793
504	XP_040201981.1	DNA polymerase delta subunit 2 [Rana temporaria]	POLD2	1	463	137	110	102	130	80	81	0.230382
505	XP_040202058.1	protein MAK16 homolog [Rana temporaria]	MAK16-B	1	298	7	19	62	15	31	19	0.0855705
506	XP_040202072.1	nucleoplasmin-2 [Rana temporaria]	NP	1	210	456	42	43	28	8	0	0.457937
507	XP_040202090.1	60S ribosomal protein L6 [Rana temporaria]	RPL6	1	264	16	77	139	117	101	112	0.354798
508	XP_040202092.1	DNA-directed RNA polymerase III subunit RPC4 [Rana temporaria]	POLR3D	1	395	6	20	20	9	14	9	0.0329114
509	XP_040202196.1	pre-mRNA-splicing factor SYF1 [Rana temporaria]	XAB2	1	883	14	71	27	53	47	54	0.0502076
510	XP_040202255.1	histone chaperone ASF1B [Rana temporaria]	ASF1B	1	200	251	139	82	88	90	69	0.599167
511	XP_040202269.1	ATP-dependent RNA helicase DDX39A [Rana temporaria]	DDX39A	2	426	126	107	54	14	42	45	0.1518
512	XP_040202320.1	peptidyl-prolyl cis-trans isomerase NIMA-interacting 1 [Rana temporaria]	PIN1	1	179	0	0	10	19	24	9	0.0577281
513	XP_040202328.1	suppressor of SWI4 1 homolog [Rana temporaria]	PPAN	1	529	0	34	53	0	26	0	0.0356018
514	XP_040202366.1	interleukin enhancer-binding factor 3 isoform X1 [Rana temporaria]	ILF3-A	6	936	73	310	334	161	82	58	0.181268
515	XP_040202420.1	zinc finger protein 318-like [Rana temporaria]		1	702	15	57	26	14	9	13	0.0318139
516	XP_040202455.1	serine/threonine-protein phosphatase PP1-gamma catalytic subunit [Rana temporaria]	PPP1CC	3	323	17	25	9	49	44	64	0.107327
517	XP_040202482.1	ribonuclease H2 subunit A [Rana temporaria]	RNASEH2A	1	298	27	53	54	86	75	51	0.193512
518	XP_040202483.1	peroxiredoxin-2 [Rana temporaria]	PRDX2	1	198	214	193	128	112	104	148	0.756734
519	XP_040202502.1	tRNA (guanine(26)-N(2))-dimethyltransferase isoform X1 [Rana temporaria]	TRMT1	3	623	12	28	17	16	15	18	0.0283574
520	XP_040202519.1	general transcription factor IIF subunit 1 [Rana temporaria]	GTF2F1	1	521	0	48	41	59	35	19	0.0646193
521	XP_040202601.1	proline-, glutamic acid- and leucine-rich protein 1 isoform X1 [Rana temporaria]	PELP1	2	1126	34	166	156	49	37	28	0.0695678
522	XP_040202688.1	DNA replication licensing factor MCM7 [Rana temporaria]	MCM7	1	720	166	472	309	322	275	275	0.421065
523	XP_040202690.1	COP9 signalosome complex subunit 6 isoform X1 [Rana temporaria]	COPS6	2	322	16	9	9	0	0	0	0.0175983
524	XP_040202700.1	aurora kinase B [Rana temporaria]	AURKB-A	2	341	0	8	21	18	27	13	0.042522
525	XP_040202838.1	proteasome subunit beta type-6 [Rana temporaria]	PSMB6	1	232	73	48	28	15	10	9	0.131466
526	XP_040202934.1	serrate RNA effector molecule homolog isoform X2 [Rana temporaria]	SRRT-A	6	1054	0	70	42	94	26	42	0.043327
527	XP_040203004.1	sentrin-specific protease 3 [Rana temporaria]	SENP3	2	458	12	77	61	34	27	10	0.0804221
528	XP_040203093.1	E3 ubiquitin-protein ligase Midline-1-like [Rana temporaria]	TRIM39	23	529	0	11	12	129	484	429	0.335539
529	XP_040203556.1	splicing factor, suppressor of white-apricot homolog isoform X1 [Rana temporaria]	SFSWAP	3	929	0	9	11	30	34	20	0.0186581
530	XP_040203655.1	nuclear cap-binding protein subunit 2, partial [Rana temporaria]	NCBP2	1	186	0	32	0	14	22	0	0.0609319
531	XP_040203696.1	midasin [Rana temporaria]	MDN1	1	5501	220	743	749	400	226	170	0.0759862
532	XP_040203707.1	60S ribosomal protein L32-like [Rana temporaria]	RPL32	2	150	0	7	11	9	9	0	0.04
533	XP_040203724.1	CCAAT/enhancer-binding protein zeta [Rana temporaria]	CEBPZ	1	971	0	13	27	15	94	47	0.0336423
534	XP_040203775.1	tRNA (uracil-5-)-methyltransferase homolog A isoform X1 [Rana temporaria]	TRMT2A	2	720	32	128	79	84	86	67	0.110185
535	XP_040203914.1	protein phosphatase 1G [Rana temporaria]	PPM1G	1	549	88	88	47	12	31	37	0.0919854
536	XP_040204045.1	integrator complex subunit 9 [Rana temporaria]	INTS9	1	658	15	18	31	47	70	41	0.056231
537	XP_040204162.1	perilipin-3-like isoform X1 [Rana temporaria]	PLIN3	2	437	15	81	53	22	14	17	0.0770404
538	XP_040204186.1	ubiquitin recognition factor in ER-associated degradation protein 1 [Rana temporaria]	UFD1	1	307	50	48	22	68	50	26	0.143322
539	XP_040204233.1	protein HIRA isoform X2 [Rana temporaria]	HIRA	2	1010	0	20	29	0	59	40	0.0244224
540	XP_040204365.1	cell division cycle 5-like protein [Rana temporaria]	CDC5L	1	805	0	131	118	93	94	49	0.100414
541	XP_040204442.1	splicing factor 3B subunit 6 [Rana temporaria]	SF3B6	1	125	0	0	12	28	18	8	0.088
542	XP_040204502.1	ATP-dependent RNA helicase DDX1 [Rana temporaria]	DDX1	1	740	51	107	36	35	27	20	0.0621622
543	XP_040204529.1	nucleolar protein 10 [Rana temporaria]	NOL10	1	729	0	80	106	0	28	0	0.0489255
544	XP_040204591.1	ribonuclease H1 isoform X1 [Rana temporaria]	RNASEH1	2	328	0	21	30	28	0	0	0.0401423
545	XP_040204593.1	40S ribosomal protein S7 [Rana temporaria]	RPS7	1	194	6	18	10	8	14	11	0.0575601
546	XP_040204718.1	UBX domain-containing protein 7 [Rana temporaria]	UBXN7	1	500	9	10	9	18	0	10	0.0186667
547	XP_040204749.1	E3 ubiquitin-protein ligase TRIP12 isoform X1 [Rana temporaria]	TRIP12	11	2083	0	8	0	0	9	8	0.00200032
548	XP_040204804.1	protein IWS1 homolog isoform X1 [Rana temporaria]	IWS1	2	1110	0	40	14	22	0	0	0.0114114
549	XP_040204987.1	cullin-3 [Rana temporaria]	CUL3A	1	768	8	28	19	0	0	0	0.0119358
550	XP_040205051.1	macrophage migration inhibitory factor-like [Rana temporaria]	MIF	1	115	52	30	17	0	24	26	0.215942
551	XP_040205078.1	ATP-dependent RNA helicase DDX51 [Rana temporaria]	DDX51	1	660	0	41	85	34	64	34	0.0651515
552	XP_040205160.1	GMP synthase [glutamine-hydrolyzing] [Rana temporaria]	GMPS	1	692	404	485	340	288	403	380	0.55395
553	XP_040205185.1	serine/Arginine-related protein 53 [Rana temporaria]	RSRC1	2	323	7	8	9	6	0	0	0.0154799
554	XP_040205349.1	small nuclear ribonucleoprotein Sm D3 [Rana temporaria]	SNRPD3	2	126	31	40	39	43	46	32	0.305556
555	XP_040205391.1	replication factor C subunit 4 [Rana temporaria]	RFC4	4	363	13	134	202	241	205	147	0.432507
556	XP_040205597.1	deoxyribodipyrimidine photo-lyase-like isoform X1 [Rana temporaria]	PHR	7	607	154	375	267	171	164	138	0.348435
557	XP_040205636.1	nucleolin isoform X1 [Rana temporaria]	NCL	5	677	771	1463	1562	711	592	492	1.37642
558	XP_040205647.1	26S proteasome non-ATPase regulatory subunit 1 [Rana temporaria]	PSMD1	1	951	31	90	42	45	36	22	0.0466176
559	XP_040205709.1	26S proteasome non-ATPase regulatory subunit 2 [Rana temporaria]	PSMD2	1	896	51	138	49	14	12	13	0.0515253
560	XP_040205713.1	DNA-directed RNA polymerases I, II, and III subunit RPABC3 [Rana temporaria]	POLR2H	2	150	19	52	25	8	23	10	0.152222
561	XP_040205825.1	DNA primase large subunit isoform X1 [Rana temporaria]	PRIM2	2	534	14	57	40	64	62	55	0.0911361
562	XP_040205858.1	isoaspartyl peptidase/L-asparaginase [Rana temporaria]	ASRGL1	2	310	39	54	31	12	0	12	0.0795699
563	XP_040205950.1	phosphoacetylglucosamine mutase [Rana temporaria]	PGM3	1	543	35	18	24	8	7	0	0.0282382
564	XP_040205988.1	heterogeneous nuclear ribonucleoprotein Q isoform X1 [Rana temporaria]	SYNCRIP	8	623	39	145	126	111	69	84	0.153558
565	XP_040206087.1	serine/arginine-rich splicing factor 9 [Rana temporaria]	SRSF9	1	233	10	14	20	0	0	0	0.0314735
566	XP_040206119.1	dynein light chain 1, cytoplasmic [Rana temporaria]	DYNLL1	2	89	15	29	0	13	7	12	0.142322
567	XP_040206198.1	histone deacetylase 2 [Rana temporaria]	HDAC2	2	488	40	110	28	63	40	62	0.117145
568	XP_040206528.1	peptidyl-prolyl cis-trans isomerase-like 4 [Rana temporaria]	PPIL4	1	477	74	136	98	102	88	94	0.206848
569	XP_040206615.1	unhealthy ribosome biogenesis protein 2 homolog [Rana temporaria]	URB2	1	1522	0	31	62	40	73	40	0.0269382
570	XP_040206662.1	serine/threonine-protein kinase Chk2 [Rana temporaria]	CHEK2	2	535	7	0	0	10	10	0	0.00841121
571	XP_040206692.1	ribosomal oxygenase 1 [Rana temporaria]	RIOX1	1	573	0	38	55	47	28	26	0.0564282
572	XP_040206704.1	serine/arginine-rich splicing factor 7 isoform X1 [Rana temporaria]	SRSF7	5	306	36	18	23	9	8	9	0.0561002
573	XP_040206975.1	probable ATP-dependent RNA helicase DDX27 [Rana temporaria]	DDX27	1	759	0	119	137	31	34	23	0.075538
574	XP_040206990.1	proteasome subunit beta type-1 [Rana temporaria]	PSMB1	2	240	72	69	48	15	0	0	0.141667
575	XP_040206999.1	heterogeneous nuclear ribonucleoprotein U [Rana temporaria]	HNRNPU	1	784	11	131	86	35	27	14	0.0646259
576	XP_040207006.1	eukaryotic initiation factor 4A-III [Rana temporaria]	EIF4A3	4	413	0	0	0	9	15	17	0.0165456
577	XP_040207012.1	DNA-directed RNA polymerase I subunit RPA2 [Rana temporaria]	POLR1B	1	1135	0	45	48	20	0	0	0.0165932
578	XP_040207052.1	exportin-1 [Rana temporaria]	XPO1	1	1077	7	18	0	39	0	15	0.0122253
579	XP_040207061.1	poly(A) polymerase gamma isoform X1 [Rana temporaria]	PAPOLG	2	803	0	0	9	48	40	57	0.0319635
580	XP_040207119.1	crooked neck-like protein 1 [Rana temporaria]	CRNKL1	1	692	18	74	46	76	38	42	0.0708092
581	XP_040207136.1	DNA-directed RNA polymerase III subunit RPC6 [Rana temporaria]	POLR3F	1	314	12	14	10	16	0	10	0.0329087
582	XP_040207155.1	malate dehydrogenase, cytoplasmic [Rana temporaria]	MDH1	1	334	154	145	125	29	0	0	0.226048
583	XP_040207371.1	RRP15-like protein [Rana temporaria]	RRP15	1	240	0	31	39	0	11	8	0.0618056
584	XP_040207475.1	protein phosphatase 1B isoform X1 [Rana temporaria]	PPM1B	4	463	14	16	0	9	0	0	0.0140389
585	XP_040207513.1	calmodulin-1 [Rana temporaria]	CALM2-B	2	149	191	89	66	36	21	35	0.489933
586	XP_040207517.1	DNA mismatch repair protein Msh2 [Rana temporaria]	MSH2	1	930	233	215	185	211	157	152	0.206631
587	XP_040207521.1	DNA mismatch repair protein Msh6 [Rana temporaria]	MSH6	1	1338	239	339	218	365	243	246	0.205531
588	XP_040207624.1	tRNA (adenine(58)-N(1))-methyltransferase non-catalytic subunit TRM6 [Rana temporaria]	TRMT6	1	490	18	55	54	62	38	42	0.0914966
589	XP_040207681.1	DNA-directed RNA polymerases I and III subunit RPAC1 [Rana temporaria]	POLR1C	1	345	28	27	33	32	20	9	0.0719807
590	XP_040207687.1	exportin-5 isoform X1 [Rana temporaria]	XPO5	2	1223	0	0	0	29	30	28	0.0118561
591	XP_040207727.1	heat shock protein HSP 90-beta [Rana temporaria]	HSP90AB1	1	725	70	102	56	41	22	0	0.0668966
592	XP_040207735.1	cap-specific mRNA (nucleoside-2'-O-)-methyltransferase 1 [Rana temporaria]	CMTR1	2	844	0	0	0	96	30	24	0.0296209
593	XP_040207783.1	kanadaptin [Rana temporaria]	SLC4A1AP	1	1061	12	32	12	30	0	15	0.0158655
594	XP_040207797.1	WD repeat-containing protein 43 [Rana temporaria]	WDR43	1	656	0	103	145	67	72	39	0.108232
595	XP_040207812.1	Fanconi anemia group G protein [Rana temporaria]	FANCG	2	638	0	0	0	66	19	9	0.0245559
596	XP_040207844.1	probable RNA-binding protein 19 [Rana temporaria]	RBM19	1	906	0	35	53	10	54	0	0.0279617
597	XP_040207849.1	L-lactate dehydrogenase B chain-like [Rana temporaria]	LDHB	3	334	89	102	57	23	0	22	0.146208
598	XP_040207856.1	ATP-dependent RNA helicase DDX54 [Rana temporaria]	DDX54	1	850	0	73	88	9	55	50	0.0539216
599	XP_040207866.1	RNA-binding protein EWS isoform X1 [Rana temporaria]	EWSR1	7	689	49	143	130	25	16	13	0.0909531
600	XP_040207949.1	splicing factor 3A subunit 1 isoform X1 [Rana temporaria]	SF3A1	2	802	8	74	0	172	105	124	0.100374
601	XP_040208033.1	pescadillo homolog [Rana temporaria]	PES1	1	585	9	93	72	58	85	63	0.108262
602	XP_040208047.1	DNA polymerase epsilon catalytic subunit A [Rana temporaria]	POLE	1	2286	21	68	16	16	16	25	0.011811
603	XP_040208140.1	GDP-L-fucose synthase [Rana temporaria]	GFUS	1	320	92	88	40	9	26	10	0.138021
604	XP_040208182.1	pre-mRNA-splicing factor SYF2 [Rana temporaria]	SYF2	1	234	0	20	8	20	7	0	0.0391738
605	XP_040208214.1	replication protein A 14 kDa subunit [Rana temporaria]	RPA3	1	121	230	171	93	85	162	136	1.20799
606	XP_040208265.1	papilin-like isoform X1 [Rana temporaria]	PPN	3	993	0	447	637	78	0	20	0.198389
607	XP_040208376.1	heterogeneous nuclear ribonucleoproteins C1/C2 isoform X1 [Rana temporaria]	HNRNPC	5	311	17	42	47	63	38	28	0.125938
608	XP_040208437.1	poly [ADP-ribose] polymerase 2 isoform X1 [Rana temporaria]	PARP2	4	777	7	51	32	27	0	0	0.0250965
609	XP_040208607.1	nucleolar GTP-binding protein 1 [Rana temporaria]	GTPBP4	1	632	11	83	94	169	152	122	0.166403
610	XP_040208622.1	DNA-(apurinic or apyrimidinic site) endonuclease [Rana temporaria]	APEX1	1	311	36	48	20	18	9	8	0.0744909
611	XP_040208718.1	H/ACA ribonucleoprotein complex subunit 3 [Rana temporaria]	NOP10	1	64	7	17	24	0	0	0	0.125
612	XP_040208773.1	N6-adenosine-methyltransferase catalytic subunit [Rana temporaria]	METTL3	1	594	0	31	24	10	0	0	0.0182379
613	XP_040208782.1	TOX high mobility group box family member 4 isoform X1 [Rana temporaria]	TOX4	5	645	0	9	10	11	10	7	0.0121447
614	XP_040208823.1	heterogeneous nuclear ribonucleoproteins A2/B1 isoform X1 [Rana temporaria]	HNRNPA2B1	3	357	33	23	23	28	0	10	0.0546218
615	XP_040208896.1	FACT complex subunit SPT16 [Rana temporaria]	SUPT16H	1	1037	190	455	356	262	184	183	0.261974
616	XP_040208929.1	60S ribosomal protein L15 [Rana temporaria]	RPL15	1	204	26	23	30	16	48	25	0.137255
617	XP_040209088.1	cullin-1 isoform X1 [Rana temporaria]	CUL1	3	783	8	8	0	10	7	0	0.00702427
618	XP_040209183.1	proteasome subunit alpha type-2 [Rana temporaria]	PSMA2	1	234	194	163	98	0	40	27	0.371795
619	XP_040209261.1	uncharacterized protein C7orf57 homolog isoform X1 [Rana temporaria]	GM11992	4	254	6	40	0	20	12	13	0.0597113
620	XP_040209266.1	maternal DNA replication licensing factor mcm6 [Rana temporaria]	MMCM6	1	813	215	518	312	328	265	255	0.388069
621	XP_040209273.1	testis-expressed protein 10 [Rana temporaria]	TEX10	1	920	11	59	76	25	35	8	0.0387681
622	XP_040209352.1	programmed cell death protein 6 [Rana temporaria]	PDCD6	1	182	18	51	28	11	0	9	0.107143
623	XP_040209383.1	little elongation complex subunit 1 isoform X1 [Rana temporaria]	ICE1	6	2046	0	0	0	24	16	8	0.00391007
624	XP_040209419.1	tetratricopeptide repeat protein 5 [Rana temporaria]	TTC5	1	429	0	0	0	39	29	40	0.041958
625	XP_040209457.1	RNA cytosine C(5)-methyltransferase NSUN2 isoform X1 [Rana temporaria]	NSUN2	4	862	49	162	89	62	28	36	0.0823666
626	XP_040209544.1	vacuolar protein sorting-associated protein 4B [Rana temporaria]	VPS4B	3	443	14	0	0	36	42	30	0.0458992
627	XP_040209557.1	leukocyte elastase inhibitor-like isoform X2 [Rana temporaria]	SERPINB1	2	379	16	23	30	10	13	11	0.0452946
628	XP_040209562.1	ATPase WRNIP1 [Rana temporaria]	WRNIP1	1	609	0	0	0	7	25	12	0.0120416
629	XP_040209563.1	GDP-mannose 4,6 dehydratase [Rana temporaria]	GMDS	1	366	61	121	61	0	0	0	0.110656
630	XP_040209583.1	serine/threonine-protein kinase PRP4 homolog [Rana temporaria]	PRPF4B	1	994	0	12	10	10	9	10	0.00855131
631	XP_040209611.1	pre-mRNA-splicing factor RBM22 [Rana temporaria]	RBM22	1	416	0	8	0	20	0	13	0.0164263
632	XP_040209711.1	protein DEK isoform X1 [Rana temporaria]	DEK	2	390	40	139	0	0	8	0	0.0799145
633	XP_040209782.1	RNA polymerase II subunit A C-terminal domain phosphatase isoform X1 [Rana temporaria]	CTDP1	2	980	11	24	13	0	0	0	0.00816327
634	XP_040209850.1	mRNA cap guanine-N7 methyltransferase isoform X1 [Rana temporaria]	RNMT	4	461	16	69	35	0	8	8	0.0491685
635	XP_040209978.1	ubiquitin carboxyl-terminal hydrolase 14 [Rana temporaria]	USP14	1	489	17	15	16	0	0	0	0.0163599
636	XP_040210104.1	DNA-dependent protein kinase catalytic subunit [Rana temporaria]	PRKDC	1	4149	18	100	54	176	1063	863	0.0913473
637	XP_040210105.1	DNA replication licensing factor MCM4 [Rana temporaria]	MCM4	1	862	267	492	332	307	254	296	0.376643
638	XP_040210106.1	ubiquitin-conjugating enzyme E2 variant 2 [Rana temporaria]	UBE2V2	2	144	0	0	0	14	25	16	0.0636574
639	XP_040210137.1	transcription elongation factor A protein 1 isoform X1 [Rana temporaria]	TCEA1	6	306	10	41	36	26	31	35	0.0974946
640	XP_040210146.1	proteasome subunit beta type-5-like [Rana temporaria]	PSMB5	1	257	113	105	68	21	15	30	0.228275
641	XP_040210354.1	60S ribosomal protein L7 [Rana temporaria]	RPL7	1	246	50	45	29	40	73	58	0.199864
642	XP_040210535.1	nibrin [Rana temporaria]	NBN	1	761	0	15	37	410	445	370	0.279676
643	XP_040210539.1	proteasome activator complex subunit 1 [Rana temporaria]	PSME1	1	250	36	49	24	0	0	8	0.078
644	XP_040210554.1	proteasome activator complex subunit 2 [Rana temporaria]	PSME2	1	241	18	33	7	0	0	0	0.0401107
645	XP_040210593.1	RNA-binding protein 12B-like [Rana temporaria]	RBM12B	2	670	0	15	6	25	16	0	0.0154229
646	XP_040210637.1	integrator complex subunit 8 [Rana temporaria]	INTS8	1	1008	0	17	10	43	26	15	0.0183532
647	XP_040210692.1	60S ribosomal protein L30 [Rana temporaria]	RPL30	3	116	18	51	46	91	53	45	0.436782
648	XP_040210698.1	2-iminobutanoate/2-iminopropanoate deaminase isoform X1 [Rana temporaria]	RIDA	3	139	60	20	25	0	0	0	0.125899
649	XP_040210732.1	E3 ubiquitin-protein ligase UBR5 isoform X1 [Rana temporaria]	UBR5	15	2801	0	63	41	0	16	0	0.00714031
650	XP_040210757.1	DDB1- and CUL4-associated factor 13 [Rana temporaria]	DCAF13	1	445	0	56	57	23	16	0	0.0569288
651	XP_040210840.1	zinc fingers and homeoboxes protein 2 [Rana temporaria]	ZHX2	1	792	0	22	15	9	0	0	0.00968013
652	XP_040211013.1	poly(U)-binding-splicing factor PUF60 isoform X1 [Rana temporaria]	PUF60	6	598	42	39	15	26	33	10	0.0459866
653	XP_040211165.1	coiled-coil domain-containing protein 12 [Rana temporaria]	CCDC12	1	156	15	28	11	15	0	0	0.0737179
654	XP_040211261.1	ATP-dependent RNA helicase DHX30 isoform X1 [Rana temporaria]	DHX30	2	1137	0	10	0	16	10	0	0.00527704
655	XP_040211280.1	periodic tryptophan protein 2 homolog [Rana temporaria]	PWP2	1	912	0	34	48	0	9	0	0.0166301
656	XP_040211459.1	recQ-mediated genome instability protein 1 [Rana temporaria]	RMI1	2	504	0	0	0	25	13	10	0.015873
657	XP_040211460.1	heterogeneous nuclear ribonucleoprotein K isoform X1 [Rana temporaria]	HNRNPK	3	399	43	93	73	57	59	43	0.153718
658	XP_040211592.1	transducin-like enhancer protein 1 isoform X1 [Rana temporaria]	TLE1	14	801	0	0	0	25	19	27	0.0147732
659	XP_040211815.1	3-oxoacyl-[acyl-carrier-protein] reductase FabG-like [Rana temporaria]	FABG	1	264	65	42	0	34	59	47	0.155934
660	XP_040211832.1	phosphoribosylformylglycinamidine synthase isoform X1 [Rana temporaria]	PFAS	3	1321	15	10	9	0	0	0	0.00428968
661	XP_040211866.1	profilin-1-like [Rana temporaria]	PFN1	2	139	15	79	53	25	10	12	0.232614
662	XP_040211943.1	RNA-binding protein FUS isoform X1 [Rana temporaria]	FUS	7	576	69	42	17	39	14	21	0.0584491
663	XP_040211969.1	nuclear factor 7, brain-like [Rana temporaria]		21	652	596	1666	1227	774	609	583	1.39443
664	XP_040212056.1	HIRA-interacting protein 3 isoform X1 [Rana temporaria]	HIRIP3	2	964	0	6	0	25	11	27	0.0119295
665	XP_040212087.1	fructose-bisphosphate aldolase A [Rana temporaria]	ALDOA	2	364	10	51	35	23	19	39	0.081044
666	XP_040212223.1	annexin A1-like [Rana temporaria]	ANXA1	1	228	0	0	0	7	78	49	0.0979532
667	XP_040212239.1	uncharacterized protein LOC120943168		1	225	0	14	8	0	7	0	0.0214815
668	XP_040212241.1	annexin A1-like [Rana temporaria]		1	342	87	221	136	117	281	186	0.500975
669	XP_040212283.1	COP9 signalosome complex subunit 3 [Rana temporaria]	COPS3	1	423	40	28	20	0	22	23	0.0524035
670	XP_040212382.1	uncharacterized protein LOC120943248		1	725	0	0	0	14	14	9	0.00850575
671	XP_040212384.1	chromosome transmission fidelity protein 18 homolog isoform X1 [Rana temporaria]	CHTF18	4	994	0	63	47	120	105	84	0.0702549
672	XP_040212405.1	transducin beta-like protein 3 [Rana temporaria]	TBL3	1	823	0	67	74	9	12	10	0.0348319
673	XP_040212551.1	TBC1 domain family member 24 isoform X1 [Rana temporaria]	TBC1D24	4	569	186	207	144	117	140	116	0.26655
674	XP_040212588.1	jupiter microtubule associated homolog 2 [Rana temporaria]	JPT2	1	205	42	42	35	71	91	61	0.278049
675	XP_040212601.1	26S proteasome regulatory subunit 4 [Rana temporaria]	PSMC1	1	440	36	37	38	0	0	25	0.0515152
676	XP_040212658.1	SUMO-conjugating enzyme UBC9 [Rana temporaria]	UBE2I	1	158	31	35	25	26	29	24	0.179325
677	XP_040212680.1	uncharacterized protein C7orf50 homolog isoform X1 [Rana temporaria]		2	209	0	31	24	0	0	10	0.0518341
678	XP_040212751.1	DNA replication licensing factor MCM5 [Rana temporaria]	MCM5	2	735	444	791	604	804	620	673	0.892517
679	XP_040212791.1	THUMP domain-containing protein 1 [Rana temporaria]	THUMPD1	1	313	0	0	10	14	8	9	0.0218317
680	XP_040212806.1	poly(A)-specific ribonuclease PARN [Rana temporaria]	PARN	1	633	42	110	87	89	114	115	0.146656
681	XP_040212869.1	ribosomal L1 domain-containing protein 1 [Rana temporaria]	RSL1D1	1	369	35	166	194	141	148	139	0.371725
682	XP_040212900.1	ubiquitin carboxyl-terminal hydrolase 7 isoform X1 [Rana temporaria]	USP7	2	1121	184	287	184	126	108	113	0.148974
683	XP_040212942.1	hemoglobin subunit beta-like [Rana temporaria]	HBB	1	141	0	10	0	38	0	36	0.0992908
684	XP_040212972.1	putative RNA-binding protein Luc7-like 1 [Rana temporaria]	LUC7L	1	314	17	0	0	17	24	25	0.0440552
685	XP_040213054.1	splicing factor 3B subunit 1 isoform X1 [Rana temporaria]	SF3B1	2	1307	0	30	31	97	83	46	0.0365978
686	XP_040213166.1	nucleolar protein 58 [Rana temporaria]	NOP58	1	527	0	52	93	135	98	12	0.12334
687	XP_040213178.1	ribosome biogenesis protein WDR12 [Rana temporaria]	WDR12	2	423	0	53	58	17	21	9	0.0622537
688	XP_040213257.1	pumilio homolog 3 [Rana temporaria]	PUM3	1	641	0	42	59	65	69	41	0.0717629
689	XP_040213466.1	COP9 signalosome complex subunit 8 [Rana temporaria]	COPS8	1	193	32	26	19	0	0	0	0.066494
690	XP_040213529.1	bifunctional purine biosynthesis protein ATIC [Rana temporaria]	ATIC	1	589	39	107	48	11	0	0	0.0580079
691	XP_040213540.1	formimidoyltransferase-cyclodeaminase isoform X1 [Rana temporaria]	FTCD	2	539	6	18	16	0	8	0	0.0148423
692	XP_040213608.1	heterogeneous nuclear ribonucleoprotein A3 isoform X1 [Rana temporaria]		4	388	54	57	69	79	30	43	0.142612
693	XP_040213702.1	serine/threonine-protein kinase tousled-like 1 isoform X2 [Rana temporaria]	TLK1	7	745	0	38	28	24	102	34	0.0505593
694	XP_040213717.1	lupus La protein [Rana temporaria]	SSB-B	1	409	115	268	199	184	98	122	0.401793
695	XP_040213789.1	grancalcin [Rana temporaria]	GCA	1	201	27	50	0	0	0	7	0.0696517
696	XP_040213931.1	telomere-associated protein RIF1 isoform X1 [Rana temporaria]	RIF1	6	2473	0	98	84	107	186	121	0.0401671
697	XP_040214066.1	aspartyl aminopeptidase isoform X1 [Rana temporaria]	DNPEP	2	503	44	51	16	0	0	0	0.0367793
698	XP_040214150.1	SWI/SNF-related matrix-associated actin-dependent regulator of chromatin subfamily A-like protein 1 [Rana temporaria]	SMARCAL1	2	930	0	9	0	0	25	8	0.00752688
699	XP_040214152.1	X-ray repair cross-complementing protein 5 [Rana temporaria]	XRCC5	1	724	181	237	111	121	300	234	0.27256
700	XP_040214157.1	general transcription and DNA repair factor IIH helicase subunit XPB [Rana temporaria]	ERCC3	1	779	0	27	9	32	66	36	0.0363714
701	XP_040214214.1	translin isoform X1 [Rana temporaria]	TSN	2	239	38	18	9	0	20	24	0.0760112
702	XP_040214218.1	ELL-associated factor 2 [Rana temporaria]	EAF2	1	284	0	0	0	19	26	7	0.0305164
703	XP_040214294.1	ATP-dependent RNA helicase DDX18 [Rana temporaria]	DDX18	1	635	9	95	104	39	125	55	0.112073
704	XP_040214505.1	galectin-1-like [Rana temporaria]		1	135	166	146	117	40	38	65	0.706173
705	XP_040214613.1	rho GDP-dissociation inhibitor 2 [Rana temporaria]	ARHGDIB	2	202	12	32	13	0	0	0	0.0470297
706	XP_040214622.1	WW domain-binding protein 11 isoform X1 [Rana temporaria]	WBP11	2	645	8	0	12	83	48	44	0.0503876
707	XP_040214640.1	protein mono-ADP-ribosyltransferase PARP3 [Rana temporaria]	PARP3	2	546	0	18	50	87	78	45	0.0848596
708	XP_040214658.1	galectin-1-like [Rana temporaria]	#N/A	1	128	13	14	12	0	10	11	0.078125
709	XP_040214755.1	Fanconi anemia group D2 protein [Rana temporaria]	FANCD2	2	1437	0	8	6	70	83	18	0.0214567
710	XP_040214792.1	protein B4 [Rana temporaria]	B4	1	259	25	62	71	73	56	34	0.206564
711	XP_040214816.1	U6 snRNA-associated Sm-like protein LSm3 [Rana temporaria]	LSM3	1	101	29	44	0	0	0	19	0.151815
712	XP_040214914.1	DNA replication licensing factor MCM2 [Rana temporaria]	MCM2	1	886	352	508	323	259	267	260	0.370391
713	XP_040214983.1	probable peptidyl-tRNA hydrolase 2 [Rana temporaria]		1	189	16	28	18	18	0	0	0.0705467
714	XP_040214997.1	serine/threonine-protein phosphatase 4 regulatory subunit 2 [Rana temporaria]	PPP4R2	1	413	19	40	24	0	0	0	0.0334948
715	XP_040215051.1	UV excision repair protein RAD23 homolog B isoform X1 [Rana temporaria]	RAD23B	2	422	38	55	21	27	26	19	0.0734597
716	XP_040215110.1	26S proteasome non-ATPase regulatory subunit 6 [Rana temporaria]	PSMD6	1	389	0	65	44	0	23	25	0.0672665
717	XP_040215112.1	60S ribosomal protein L13a [Rana temporaria]	RPL13A	2	256	0	29	29	16	36	19	0.0839844
718	XP_040215263.1	transcription cofactor vestigial-like protein 4 isoform X2 [Rana temporaria]	VGLL4	2	287	0	0	0	26	11	10	0.0272938
719	XP_040215284.1	pre-mRNA-splicing factor ISY1 homolog [Rana temporaria]	ISY1	1	319	0	18	0	23	13	0	0.0282132
720	XP_040215362.1	guanine nucleotide-binding protein-like 3 [Rana temporaria]	GNL3	1	564	11	120	163	203	160	135	0.234043
721	XP_040215430.1	60S ribosomal protein L3 [Rana temporaria]	RPL3	2	403	0	48	35	93	92	40	0.127378
722	XP_040215520.1	probable ATP-dependent RNA helicase DDX47 isoform X1 [Rana temporaria]	DDX47	2	445	23	105	100	51	69	53	0.150187
723	XP_040215571.1	NHP2-like protein 1 [Rana temporaria]	SNU13	1	188	24	60	54	61	57	50	0.271277
724	XP_040215573.1	X-ray repair cross-complementing protein 6 [Rana temporaria]	XRCC6	2	611	197	128	92	226	326	273	0.338789
725	XP_040215604.1	cold-inducible RNA-binding protein B-like [Rana temporaria]	#N/A	4	170	162	92	127	46	82	57	0.554902
726	XP_040215675.1	4-trimethylaminobutyraldehyde dehydrogenase [Rana temporaria]	ALDH9A1	4	518	53	14	22	0	9	18	0.037323
727	XP_040215876.1	RNA 3'-terminal phosphate cyclase [Rana temporaria]	RTCA	1	366	28	30	14	20	11	13	0.0528233
728	XP_040215955.1	60S ribosomal protein L5 [Rana temporaria]	RPL5-A	1	298	0	41	40	9	10	0	0.0559284
729	XP_040215999.1	DBIRD complex subunit ZNF326 [Rana temporaria]	ZNF326	1	498	144	351	387	149	148	160	0.448126
730	XP_040216008.1	transcription initiation factor IIB [Rana temporaria]	GTF2B	1	314	0	16	0	47	25	9	0.0514862
731	XP_040216046.1	peroxiredoxin-6 [Rana temporaria]	PRDX6	1	224	77	127	77	0	9	0	0.215774
732	XP_040216065.1	galectin-1-like [Rana temporaria]	#N/A	1	184	157	100	79	58	20	18	0.391304
733	XP_040216252.1	ATP-dependent RNA helicase A isoform X1 [Rana temporaria]	DHX9	3	1257	33	168	198	127	71	91	0.0912225
734	XP_040216279.1	centromere protein P-like [Rana temporaria]	CENPP	1	289	0	21	34	0	14	0	0.0397924
735	XP_040216405.1	prostaglandin reductase 1-like isoform X1 [Rana temporaria]	PTGR1	4	331	27	42	26	0	0	0	0.0478348
736	XP_040216487.1	40S ribosomal protein S11 [Rana temporaria]	RPS11	1	158	0	0	20	32	17	16	0.0896624
737	XP_040216512.1	vitellogenin-A2-like [Rana temporaria]		1	1896	113	1659	2579	5873	3789	3703	1.55731
738	XP_040216513.1	vitellogenin-A2-like [Rana temporaria]		1	1817	91	1884	2699	3883	3034	3062	1.34407
739	XP_040216519.1	ribosome production factor 1 [Rana temporaria]	RPF1	1	347	0	9	11	0	0	7	0.0129683
740	XP_040216530.1	60S ribosomal protein L27-like [Rana temporaria]	RPL27	2	136	0	16	25	43	26	27	0.167892
741	XP_040216576.1	vitellogenin-1-like [Rana temporaria]	VTG1	1	1992	0	18	35	271	163	182	0.0559739
742	XP_040216588.1	far upstream element-binding protein 1 isoform X1 [Rana temporaria]	FUBP1	8	664	67	231	87	162	122	167	0.209839
743	XP_040216625.1	quinone oxidoreductase [Rana temporaria]	CRYZ	2	329	63	34	8	27	41	45	0.110436
744	XP_040216648.1	serine/arginine-rich splicing factor 11 isoform X1 [Rana temporaria]	SRSF11	1	460	19	27	0	42	39	29	0.0565217
745	XP_040216681.1	ribosomal RNA-processing protein 7 homolog A [Rana temporaria]	RRP7A	1	273	0	53	37	0	11	0	0.0616606
746	XP_040216711.1	phosphoglucomutase-1 isoform X2 [Rana temporaria]	PGM1	2	563	19	59	15	0	0	0	0.0275311
747	XP_040216753.1	proteasome subunit alpha type-4 [Rana temporaria]	PSMA4	1	256	88	66	46	11	9	14	0.152344
748	XP_040216887.1	40S ribosomal protein S8 [Rana temporaria]	RPS8	2	208	0	94	69	42	47	39	0.233173
749	XP_040216898.1	kinesin-like protein KIF2C isoform X1 [Rana temporaria]	KIF2C	5	738	0	42	53	103	86	94	0.0853659
750	XP_040217018.1	nuclear cap-binding protein subunit 1 [Rana temporaria]	NCBP1-B	1	788	19	59	26	49	45	31	0.0484349
751	XP_040217037.1	nuclear autoantigenic sperm protein [Rana temporaria]	HIBN	1	345	412	607	426	216	185	205	0.990821
752	XP_040217065.1	acidic leucine-rich nuclear phosphoprotein 32 family member B [Rana temporaria]	ANP32B	5	260	239	198	108	63	44	56	0.453846
753	XP_040217101.1	triosephosphate isomerase isoform X1 [Rana temporaria]	TPI1	1	248	269	263	211	20	64	74	0.605511
754	XP_040217117.1	probable 28S rRNA (cytosine(4447)-C(5))-methyltransferase [Rana temporaria]	NOP2	1	725	0	96	117	108	119	90	0.121839
755	XP_040217120.1	glyceraldehyde-3-phosphate dehydrogenase-like isoform X1 [Rana temporaria]	GAPDH	2	428	12	19	19	10	0	8	0.0264798
756	XP_040217125.1	glyceraldehyde-3-phosphate dehydrogenase-like [Rana temporaria]	GAPDH	3	312	77	123	87	193	92	87	0.35203
757	XP_040217126.1	chromodomain-helicase-DNA-binding protein 4 isoform X1 [Rana temporaria]	CHD4	4	1901	81	298	194	246	145	211	0.103016
758	XP_040217169.1	phosphoglycerate mutase 1 [Rana temporaria]	PGAM1	1	253	9	26	10	0	0	0	0.0296443
759	XP_040217237.1	copper homeostasis protein cutC homolog [Rana temporaria]	CUTC	2	252	12	24	15	0	0	0	0.0337302
760	XP_040217274.1	mitotic checkpoint protein BUB3 isoform X1 [Rana temporaria]	BUB3	2	337	8	59	78	115	155	88	0.248764
761	XP_040217370.1	BRCA2 and CDKN1A-interacting protein [Rana temporaria]	BCCIP	1	308	29	37	15	0	0	0	0.0438312
762	XP_040217398.1	mini-chromosome maintenance complex-binding protein isoform X1 [Rana temporaria]	MCMBP	2	637	44	99	29	8	38	28	0.0643642
763	XP_040217575.1	survival of motor neuron-related-splicing factor 30 [Rana temporaria]	SMNDC1	1	241	0	0	0	42	29	20	0.0629322
764	XP_040217591.1	DNA-directed RNA polymerase I subunit RPA43 [Rana temporaria]	POLR1F	1	470	0	32	11	18	21	11	0.0329787
765	XP_040217729.1	sialic acid synthase [Rana temporaria]	NANS	1	359	0	10	15	0	0	9	0.0157846
766	XP_040217744.1	RNA/RNP complex-1-interacting phosphatase	DUSP11	1	798	0	37	50	41	0	15	0.0298663
767	XP_040217796.1	protein RRP5 homolog [Rana temporaria]	PDCD11	1	1787	0	109	208	59	187	78	0.0597836
768	XP_040217877.1	pleckstrin homology domain-containing family A member 1 isoform X1 [Rana temporaria]	PLEKHA1	2	394	0	6	0	16	19	10	0.0215736
769	XP_040217970.1	coiled-coil domain-containing protein 6 [Rana temporaria]	CCDC6	1	458	0	17	17	12	23	20	0.0323872
770	XP_040218080.1	nucleolar complex protein 3 homolog [Rana temporaria]	NOC3L	1	806	0	17	13	8	0	0	0.00785773
771	XP_040218114.1	heterogeneous nuclear ribonucleoprotein H3 isoform X1 [Rana temporaria]	HNRNPH1	2	474	116	145	127	173	123	121	0.283052
772	XP_040218126.1	nucleolar RNA helicase 2 [Rana temporaria]	DDX21-B	1	769	7	376	413	449	339	192	0.384915
773	XP_040218180.1	annexin A7 isoform X1 [Rana temporaria]	ANXA7	2	539	33	81	43	52	58	68	0.103587
774	XP_040218219.1	dnaJ homolog subfamily C member 9 [Rana temporaria]	DNAJC9	1	262	17	19	16	8	0	23	0.052799
775	XP_040218255.1	inorganic pyrophosphatase [Rana temporaria]	PPA1	1	289	69	73	31	0	0	0	0.0997693
776	XP_040176343.1	nucleolar and coiled-body phosphoprotein 1 [Rana temporaria]	NOLC1	1	818	24	214	189	95	104	45	0.136716
777	XP_040176520.1	transcriptional repressor p66-alpha isoform X1 [Rana temporaria]	GATAD2A	9	623	21	41	34	43	29	26	0.0518994
778	XP_040176540.1	DNA-directed RNA polymerase III subunit RPC1 [Rana temporaria]	POLR3A	1	1392	16	66	37	26	10	10	0.0197557

## Sheet: STRING_CellularComponent
#term ID	term description	observed gene count	background gene count	strength	false discovery rate	matching proteins in your network (IDs)
GO:0000785	Chromatin	69	1079	0.54	1.83e-16	STRG0A80TKO.XP_040176449.1,STRG0A80TKO.XP_040176520.1,STRG0A80TKO.XP_040176815.1,STRG0A80TKO.XP_040176905.1,STRG0A80TKO.XP_040178148.1,STRG0A80TKO.XP_040178555.1,STRG0A80TKO.XP_040180247.1,STRG0A80TKO.XP_040180665.1,STRG0A80TKO.XP_040181670.1,STRG0A80TKO.XP_040182364.1,STRG0A80TKO.XP_040183292.1,STRG0A80TKO.XP_040183833.1,STRG0A80TKO.XP_040184579.1,STRG0A80TKO.XP_040184882.1,STRG0A80TKO.XP_040185…
GO:0000228	Nuclear chromosome	39	320	0.82	1.87e-17	STRG0A80TKO.XP_040176449.1,STRG0A80TKO.XP_040176722.1,STRG0A80TKO.XP_040180247.1,STRG0A80TKO.XP_040181670.1,STRG0A80TKO.XP_040182364.1,STRG0A80TKO.XP_040183499.1,STRG0A80TKO.XP_040183833.1,STRG0A80TKO.XP_040184574.1,STRG0A80TKO.XP_040187161.1,STRG0A80TKO.XP_040187755.1,STRG0A80TKO.XP_040188032.1,STRG0A80TKO.XP_040189567.1,STRG0A80TKO.XP_040190334.1,STRG0A80TKO.XP_040191984.1,STRG0A80TKO.XP_040194…
GO:0098687	Chromosomal region	38	446	0.66	1.77e-12	STRG0A80TKO.XP_040180654.1,STRG0A80TKO.XP_040181278.1,STRG0A80TKO.XP_040183292.1,STRG0A80TKO.XP_040183499.1,STRG0A80TKO.XP_040184033.1,STRG0A80TKO.XP_040184361.1,STRG0A80TKO.XP_040185123.1,STRG0A80TKO.XP_040185403.1,STRG0A80TKO.XP_040186173.1,STRG0A80TKO.XP_040186730.1,STRG0A80TKO.XP_040187071.1,STRG0A80TKO.XP_040188032.1,STRG0A80TKO.XP_040189977.1,STRG0A80TKO.XP_040190114.1,STRG0A80TKO.XP_040190…
GO:0000793	Condensed chromosome	29	368	0.63	7.36e-09	STRG0A80TKO.XP_040176449.1,STRG0A80TKO.XP_040180654.1,STRG0A80TKO.XP_040182364.1,STRG0A80TKO.XP_040186173.1,STRG0A80TKO.XP_040186730.1,STRG0A80TKO.XP_040187071.1,STRG0A80TKO.XP_040187161.1,STRG0A80TKO.XP_040187755.1,STRG0A80TKO.XP_040189977.1,STRG0A80TKO.XP_040190311.1,STRG0A80TKO.XP_040190334.1,STRG0A80TKO.XP_040191369.1,STRG0A80TKO.XP_040191984.1,STRG0A80TKO.XP_040194262.1,STRG0A80TKO.XP_040198…
GO:0000775	Chromosome, centromeric region	22	323	0.57	7.68e-06	STRG0A80TKO.XP_040180654.1,STRG0A80TKO.XP_040185403.1,STRG0A80TKO.XP_040186173.1,STRG0A80TKO.XP_040186730.1,STRG0A80TKO.XP_040187071.1,STRG0A80TKO.XP_040188032.1,STRG0A80TKO.XP_040189977.1,STRG0A80TKO.XP_040190311.1,STRG0A80TKO.XP_040190334.1,STRG0A80TKO.XP_040191369.1,STRG0A80TKO.XP_040193703.1,STRG0A80TKO.XP_040194262.1,STRG0A80TKO.XP_040199973.1,STRG0A80TKO.XP_040200615.1,STRG0A80TKO.XP_040200…
GO:0000781	Chromosome, telomeric region	16	137	0.8	4.27e-07	STRG0A80TKO.XP_040181278.1,STRG0A80TKO.XP_040183292.1,STRG0A80TKO.XP_040183499.1,STRG0A80TKO.XP_040184033.1,STRG0A80TKO.XP_040184361.1,STRG0A80TKO.XP_040185123.1,STRG0A80TKO.XP_040190114.1,STRG0A80TKO.XP_040190334.1,STRG0A80TKO.XP_040192808.1,STRG0A80TKO.XP_040196095.1,STRG0A80TKO.XP_040196511.1,STRG0A80TKO.XP_040200573.1,STRG0A80TKO.XP_040210535.1,STRG0A80TKO.XP_040213687.1,STRG0A80TKO.XP_040213…
GO:0000779	Condensed chromosome, centromeric region	14	224	0.53	0.0016	STRG0A80TKO.XP_040180654.1,STRG0A80TKO.XP_040186173.1,STRG0A80TKO.XP_040186730.1,STRG0A80TKO.XP_040187071.1,STRG0A80TKO.XP_040189977.1,STRG0A80TKO.XP_040190311.1,STRG0A80TKO.XP_040190334.1,STRG0A80TKO.XP_040191369.1,STRG0A80TKO.XP_040199973.1,STRG0A80TKO.XP_040200615.1,STRG0A80TKO.XP_040207052.1,STRG0A80TKO.XP_040212624.1,STRG0A80TKO.XP_040216898.1,STRG0A80TKO.XP_040217274.1
GO:0000794	Condensed nuclear chromosome	11	101	0.77	9.27e-05	STRG0A80TKO.XP_040176449.1,STRG0A80TKO.XP_040182364.1,STRG0A80TKO.XP_040187161.1,STRG0A80TKO.XP_040187755.1,STRG0A80TKO.XP_040191984.1,STRG0A80TKO.XP_040198128.1,STRG0A80TKO.XP_040200573.1,STRG0A80TKO.XP_040208963.1,STRG0A80TKO.XP_040209652.1,STRG0A80TKO.XP_040210272.1,STRG0A80TKO.XP_040214212.1
GO:0000792	Heterochromatin	8	109	0.6	0.013	STRG0A80TKO.XP_040178555.1,STRG0A80TKO.XP_040183833.1,STRG0A80TKO.XP_040188032.1,STRG0A80TKO.XP_040190334.1,STRG0A80TKO.XP_040194262.1,STRG0A80TKO.XP_040208293.1,STRG0A80TKO.XP_040208826.1,STRG0A80TKO.XP_040218135.1
GO:0005721	Pericentric heterochromatin	5	47	0.76	0.0213	STRG0A80TKO.XP_040188032.1,STRG0A80TKO.XP_040190334.1,STRG0A80TKO.XP_040194262.1,STRG0A80TKO.XP_040208826.1,STRG0A80TKO.XP_040218135.1
GO:0005697	Telomerase holoenzyme complex	5	33	0.91	0.0061	STRG0A80TKO.XP_040178726.1,STRG0A80TKO.XP_040184034.1,STRG0A80TKO.XP_040185123.1,STRG0A80TKO.XP_040205349.1,STRG0A80TKO.XP_040208718.1
GO:0000800	Lateral element	3	12	1.13	0.0196	STRG0A80TKO.XP_040187161.1,STRG0A80TKO.XP_040198128.1,STRG0A80TKO.XP_040209652.1
GO:0090734	Site of DNA damage	21	141	0.9	6.02e-11	STRG0A80TKO.XP_040176722.1,STRG0A80TKO.XP_040183528.1,STRG0A80TKO.XP_040183833.1,STRG0A80TKO.XP_040184331.1,STRG0A80TKO.XP_040186533.1,STRG0A80TKO.XP_040187648.1,STRG0A80TKO.XP_040188116.1,STRG0A80TKO.XP_040188724.1,STRG0A80TKO.XP_040189140.1,STRG0A80TKO.XP_040191965.1,STRG0A80TKO.XP_040194459.1,STRG0A80TKO.XP_040196095.1,STRG0A80TKO.XP_040196981.1,STRG0A80TKO.XP_040200573.1,STRG0A80TKO.XP_040207…
GO:0035861	Site of double-strand break	16	107	0.91	1.96e-08	STRG0A80TKO.XP_040176722.1,STRG0A80TKO.XP_040183528.1,STRG0A80TKO.XP_040183833.1,STRG0A80TKO.XP_040184331.1,STRG0A80TKO.XP_040186533.1,STRG0A80TKO.XP_040188724.1,STRG0A80TKO.XP_040191965.1,STRG0A80TKO.XP_040194459.1,STRG0A80TKO.XP_040196095.1,STRG0A80TKO.XP_040196981.1,STRG0A80TKO.XP_040200573.1,STRG0A80TKO.XP_040207277.1,STRG0A80TKO.XP_040208214.1,STRG0A80TKO.XP_040213931.1,STRG0A80TKO.XP_040214…
GO:1990391	DNA repair complex	11	78	0.88	1.06e-05	STRG0A80TKO.XP_040183292.1,STRG0A80TKO.XP_040183499.1,STRG0A80TKO.XP_040187161.1,STRG0A80TKO.XP_040196511.1,STRG0A80TKO.XP_040198345.1,STRG0A80TKO.XP_040207517.1,STRG0A80TKO.XP_040207521.1,STRG0A80TKO.XP_040210104.1,STRG0A80TKO.XP_040214152.1,STRG0A80TKO.XP_040214755.1,STRG0A80TKO.XP_040215573.1
GO:0043601	Nuclear replisome	10	31	1.24	5.06e-08	STRG0A80TKO.XP_040176722.1,STRG0A80TKO.XP_040183499.1,STRG0A80TKO.XP_040184574.1,STRG0A80TKO.XP_040194138.1,STRG0A80TKO.XP_040194306.1,STRG0A80TKO.XP_040195724.1,STRG0A80TKO.XP_040196918.1,STRG0A80TKO.XP_040201981.1,STRG0A80TKO.XP_040205825.1,STRG0A80TKO.XP_040208214.1
GO:0042575	DNA polymerase complex	9	39	1.1	3.02e-06	STRG0A80TKO.XP_040180247.1,STRG0A80TKO.XP_040183499.1,STRG0A80TKO.XP_040184574.1,STRG0A80TKO.XP_040194138.1,STRG0A80TKO.XP_040195724.1,STRG0A80TKO.XP_040196918.1,STRG0A80TKO.XP_040201981.1,STRG0A80TKO.XP_040205825.1,STRG0A80TKO.XP_040208047.1
GO:0008023	Transcription elongation factor complex	8	90	0.68	0.0044	STRG0A80TKO.XP_040176815.1,STRG0A80TKO.XP_040180120.1,STRG0A80TKO.XP_040187566.1,STRG0A80TKO.XP_040188540.1,STRG0A80TKO.XP_040194450.1,STRG0A80TKO.XP_040208896.1,STRG0A80TKO.XP_040209383.1,STRG0A80TKO.XP_040214218.1
GO:0031390	Ctf18 RFC-like complex	7	13	1.46	7.27e-07	STRG0A80TKO.XP_040185152.1,STRG0A80TKO.XP_040192638.1,STRG0A80TKO.XP_040193703.1,STRG0A80TKO.XP_040196351.1,STRG0A80TKO.XP_040201776.1,STRG0A80TKO.XP_040205391.1,STRG0A80TKO.XP_040212384.1
GO:0043240	Fanconi anaemia nuclear complex	6	18	1.25	5.22e-05	STRG0A80TKO.XP_040185573.1,STRG0A80TKO.XP_040186730.1,STRG0A80TKO.XP_040188308.1,STRG0A80TKO.XP_040194610.1,STRG0A80TKO.XP_040207083.1,STRG0A80TKO.XP_040207812.1
GO:0071162	CMG complex	5	15	1.25	0.00032	STRG0A80TKO.XP_040202688.1,STRG0A80TKO.XP_040209266.1,STRG0A80TKO.XP_040210105.1,STRG0A80TKO.XP_040212751.1,STRG0A80TKO.XP_040214914.1
GO:0042555	MCM complex	5	20	1.13	0.00093	STRG0A80TKO.XP_040202688.1,STRG0A80TKO.XP_040209266.1,STRG0A80TKO.XP_040210105.1,STRG0A80TKO.XP_040212751.1,STRG0A80TKO.XP_040214914.1
GO:0005658	Alpha DNA polymerase:primase complex	4	7	1.49	0.00041	STRG0A80TKO.XP_040184574.1,STRG0A80TKO.XP_040194138.1,STRG0A80TKO.XP_040196918.1,STRG0A80TKO.XP_040205825.1
GO:0043625	Delta DNA polymerase complex	3	17	0.98	0.0424	STRG0A80TKO.XP_040183499.1,STRG0A80TKO.XP_040195724.1,STRG0A80TKO.XP_040201981.1
GO:0071821	FANCM-MHF complex	3	7	1.36	0.0065	STRG0A80TKO.XP_040182288.1,STRG0A80TKO.XP_040186730.1,STRG0A80TKO.XP_040188308.1
GO:0070419	Nonhomologous end joining complex	3	10	1.21	0.0139	STRG0A80TKO.XP_040210104.1,STRG0A80TKO.XP_040214152.1,STRG0A80TKO.XP_040215573.1
GO:0032299	Ribonuclease H2 complex	3	4	1.61	0.0022	STRG0A80TKO.XP_040184825.1,STRG0A80TKO.XP_040196257.1,STRG0A80TKO.XP_040202482.1
GO:0043564	Ku70:Ku80 complex	2	3	1.56	0.0267	STRG0A80TKO.XP_040214152.1,STRG0A80TKO.XP_040215573.1
GO:0008622	Epsilon DNA polymerase complex	2	5	1.33	0.0499	STRG0A80TKO.XP_040180247.1,STRG0A80TKO.XP_040208047.1
GO:0031422	RecQ family helicase-topoisomerase III complex	2	5	1.33	0.0499	STRG0A80TKO.XP_040198128.1,STRG0A80TKO.XP_040211459.1
GO:0032301	MutSalpha complex	2	2	1.73	0.0171	STRG0A80TKO.XP_040207517.1,STRG0A80TKO.XP_040207521.1
GO:0031510	SUMO activating enzyme complex	2	3	1.56	0.0267	STRG0A80TKO.XP_040179475.1,STRG0A80TKO.XP_040185269.1
GO:0035101	FACT complex	2	5	1.33	0.0499	STRG0A80TKO.XP_040176815.1,STRG0A80TKO.XP_040208896.1
GO:0016607	Nuclear speck	69	550	0.83	1.21e-31	STRG0A80TKO.XP_040176722.1,STRG0A80TKO.XP_040179192.1,STRG0A80TKO.XP_040179943.1,STRG0A80TKO.XP_040180092.1,STRG0A80TKO.XP_040180258.1,STRG0A80TKO.XP_040180466.1,STRG0A80TKO.XP_040180482.1,STRG0A80TKO.XP_040180621.1,STRG0A80TKO.XP_040181278.1,STRG0A80TKO.XP_040181557.1,STRG0A80TKO.XP_040182215.1,STRG0A80TKO.XP_040183754.1,STRG0A80TKO.XP_040184033.1,STRG0A80TKO.XP_040184203.1,STRG0A80TKO.XP_040184…
GO:0015030	Cajal body	14	85	0.95	6.9e-08	STRG0A80TKO.XP_040176343.1,STRG0A80TKO.XP_040178726.1,STRG0A80TKO.XP_040180258.1,STRG0A80TKO.XP_040183131.1,STRG0A80TKO.XP_040187364.1,STRG0A80TKO.XP_040189563.1,STRG0A80TKO.XP_040190442.1,STRG0A80TKO.XP_040190753.1,STRG0A80TKO.XP_040200554.1,STRG0A80TKO.XP_040207052.1,STRG0A80TKO.XP_040207866.1,STRG0A80TKO.XP_040209383.1,STRG0A80TKO.XP_040213166.1,STRG0A80TKO.XP_040217575.1
GO:0042405	Nuclear inclusion body	3	15	1.03	0.0321	STRG0A80TKO.XP_040190311.1,STRG0A80TKO.XP_040209700.1,STRG0A80TKO.XP_040210535.1
GO:0005635	Nuclear envelope	27	581	0.4	0.00032	STRG0A80TKO.XP_040183819.1,STRG0A80TKO.XP_040184201.1,STRG0A80TKO.XP_040184655.1,STRG0A80TKO.XP_040186173.1,STRG0A80TKO.XP_040186700.1,STRG0A80TKO.XP_040186801.1,STRG0A80TKO.XP_040187602.1,STRG0A80TKO.XP_040190311.1,STRG0A80TKO.XP_040193773.1,STRG0A80TKO.XP_040194138.1,STRG0A80TKO.XP_040198500.1,STRG0A80TKO.XP_040199190.1,STRG0A80TKO.XP_040199973.1,STRG0A80TKO.XP_040201734.1,STRG0A80TKO.XP_040203…
GO:0005643	Nuclear pore	10	95	0.75	0.0003	STRG0A80TKO.XP_040184201.1,STRG0A80TKO.XP_040184655.1,STRG0A80TKO.XP_040186173.1,STRG0A80TKO.XP_040187602.1,STRG0A80TKO.XP_040190311.1,STRG0A80TKO.XP_040199973.1,STRG0A80TKO.XP_040201734.1,STRG0A80TKO.XP_040205272.1,STRG0A80TKO.XP_040209700.1,STRG0A80TKO.XP_040212624.1
GO:0044615	Nuclear pore nuclear basket	4	17	1.1	0.0052	STRG0A80TKO.XP_040186173.1,STRG0A80TKO.XP_040190311.1,STRG0A80TKO.XP_040209700.1,STRG0A80TKO.XP_040212624.1
GO:0034399	Nuclear periphery	22	169	0.85	1.88e-10	STRG0A80TKO.XP_040181670.1,STRG0A80TKO.XP_040183560.1,STRG0A80TKO.XP_040184835.1,STRG0A80TKO.XP_040188079.1,STRG0A80TKO.XP_040189285.1,STRG0A80TKO.XP_040190033.1,STRG0A80TKO.XP_040190311.1,STRG0A80TKO.XP_040190817.1,STRG0A80TKO.XP_040193235.1,STRG0A80TKO.XP_040194138.1,STRG0A80TKO.XP_040198128.1,STRG0A80TKO.XP_040198500.1,STRG0A80TKO.XP_040199973.1,STRG0A80TKO.XP_040201777.1,STRG0A80TKO.XP_040201…
GO:0016363	Nuclear matrix	15	141	0.76	3.14e-06	STRG0A80TKO.XP_040181670.1,STRG0A80TKO.XP_040184835.1,STRG0A80TKO.XP_040188079.1,STRG0A80TKO.XP_040189285.1,STRG0A80TKO.XP_040190033.1,STRG0A80TKO.XP_040190817.1,STRG0A80TKO.XP_040193235.1,STRG0A80TKO.XP_040194138.1,STRG0A80TKO.XP_040198128.1,STRG0A80TKO.XP_040201777.1,STRG0A80TKO.XP_040209976.1,STRG0A80TKO.XP_040213687.1,STRG0A80TKO.XP_040213881.1,STRG0A80TKO.XP_040214904.1,STRG0A80TKO.XP_040215…
GO:0001650	Fibrillar center	16	134	0.81	3.26e-07	STRG0A80TKO.XP_040176343.1,STRG0A80TKO.XP_040179206.1,STRG0A80TKO.XP_040183131.1,STRG0A80TKO.XP_040185123.1,STRG0A80TKO.XP_040185151.1,STRG0A80TKO.XP_040188087.1,STRG0A80TKO.XP_040190396.1,STRG0A80TKO.XP_040190442.1,STRG0A80TKO.XP_040194805.1,STRG0A80TKO.XP_040195852.1,STRG0A80TKO.XP_040196455.1,STRG0A80TKO.XP_040200700.1,STRG0A80TKO.XP_040207012.1,STRG0A80TKO.XP_040207681.1,STRG0A80TKO.XP_040207…
GO:0000502	Proteasome complex	35	76	1.4	8.5e-32	STRG0A80TKO.XP_040180799.1,STRG0A80TKO.XP_040183093.1,STRG0A80TKO.XP_040184171.1,STRG0A80TKO.XP_040184373.1,STRG0A80TKO.XP_040185484.1,STRG0A80TKO.XP_040185628.1,STRG0A80TKO.XP_040187143.1,STRG0A80TKO.XP_040187201.1,STRG0A80TKO.XP_040187287.1,STRG0A80TKO.XP_040187404.1,STRG0A80TKO.XP_040187527.1,STRG0A80TKO.XP_040187536.1,STRG0A80TKO.XP_040187699.1,STRG0A80TKO.XP_040188079.1,STRG0A80TKO.XP_040188…
GO:0022624	Proteasome accessory complex	18	27	1.56	1.57e-18	STRG0A80TKO.XP_040183093.1,STRG0A80TKO.XP_040184171.1,STRG0A80TKO.XP_040184373.1,STRG0A80TKO.XP_040185484.1,STRG0A80TKO.XP_040187143.1,STRG0A80TKO.XP_040187201.1,STRG0A80TKO.XP_040187287.1,STRG0A80TKO.XP_040187404.1,STRG0A80TKO.XP_040187536.1,STRG0A80TKO.XP_040187699.1,STRG0A80TKO.XP_040188969.1,STRG0A80TKO.XP_040199422.1,STRG0A80TKO.XP_040205647.1,STRG0A80TKO.XP_040205709.1,STRG0A80TKO.XP_040210…
GO:0005839	Proteasome core complex	14	23	1.52	4.34e-14	STRG0A80TKO.XP_040180799.1,STRG0A80TKO.XP_040185628.1,STRG0A80TKO.XP_040187527.1,STRG0A80TKO.XP_040188079.1,STRG0A80TKO.XP_040188325.1,STRG0A80TKO.XP_040189789.1,STRG0A80TKO.XP_040190428.1,STRG0A80TKO.XP_040193247.1,STRG0A80TKO.XP_040193584.1,STRG0A80TKO.XP_040202838.1,STRG0A80TKO.XP_040206990.1,STRG0A80TKO.XP_040209183.1,STRG0A80TKO.XP_040210146.1,STRG0A80TKO.XP_040216753.1
GO:0005838	Proteasome regulatory particle	14	23	1.52	4.34e-14	STRG0A80TKO.XP_040183093.1,STRG0A80TKO.XP_040184171.1,STRG0A80TKO.XP_040184373.1,STRG0A80TKO.XP_040185484.1,STRG0A80TKO.XP_040187201.1,STRG0A80TKO.XP_040187287.1,STRG0A80TKO.XP_040187404.1,STRG0A80TKO.XP_040187536.1,STRG0A80TKO.XP_040187699.1,STRG0A80TKO.XP_040188969.1,STRG0A80TKO.XP_040205647.1,STRG0A80TKO.XP_040205709.1,STRG0A80TKO.XP_040212601.1,STRG0A80TKO.XP_040215110.1
GO:0008540	Proteasome regulatory particle, base subcomplex	7	9	1.62	1.2e-07	STRG0A80TKO.XP_040183093.1,STRG0A80TKO.XP_040184171.1,STRG0A80TKO.XP_040187287.1,STRG0A80TKO.XP_040188969.1,STRG0A80TKO.XP_040205647.1,STRG0A80TKO.XP_040205709.1,STRG0A80TKO.XP_040212601.1
GO:0019773	Proteasome core complex, alpha-subunit complex	7	10	1.58	1.99e-07	STRG0A80TKO.XP_040187527.1,STRG0A80TKO.XP_040188079.1,STRG0A80TKO.XP_040189789.1,STRG0A80TKO.XP_040190428.1,STRG0A80TKO.XP_040193584.1,STRG0A80TKO.XP_040209183.1,STRG0A80TKO.XP_040216753.1
GO:0019774	Proteasome core complex, beta-subunit complex	7	13	1.46	7.27e-07	STRG0A80TKO.XP_040180799.1,STRG0A80TKO.XP_040185628.1,STRG0A80TKO.XP_040188325.1,STRG0A80TKO.XP_040193247.1,STRG0A80TKO.XP_040202838.1,STRG0A80TKO.XP_040206990.1,STRG0A80TKO.XP_040210146.1
GO:0008541	Proteasome regulatory particle, lid subcomplex	5	11	1.39	9.98e-05	STRG0A80TKO.XP_040184373.1,STRG0A80TKO.XP_040187201.1,STRG0A80TKO.XP_040187404.1,STRG0A80TKO.XP_040187536.1,STRG0A80TKO.XP_040187699.1
GO:0008537	Proteasome activator complex	3	3	1.73	0.0014	STRG0A80TKO.XP_040187143.1,STRG0A80TKO.XP_040210539.1,STRG0A80TKO.XP_040210554.1
GO:0034515	Proteasome storage granule	2	2	1.73	0.0171	STRG0A80TKO.XP_040205647.1,STRG0A80TKO.XP_040205709.1
GO:1902911	Protein kinase complex	14	199	0.58	0.00051	STRG0A80TKO.XP_040179885.1,STRG0A80TKO.XP_040183928.1,STRG0A80TKO.XP_040187566.1,STRG0A80TKO.XP_040188540.1,STRG0A80TKO.XP_040189101.1,STRG0A80TKO.XP_040196455.1,STRG0A80TKO.XP_040196726.1,STRG0A80TKO.XP_040197490.1,STRG0A80TKO.XP_040197770.1,STRG0A80TKO.XP_040201846.1,STRG0A80TKO.XP_040214152.1,STRG0A80TKO.XP_040214157.1,STRG0A80TKO.XP_040215573.1,STRG0A80TKO.XP_040217370.1
GO:1902554	Serine/threonine protein kinase complex	13	175	0.6	0.00056	STRG0A80TKO.XP_040183928.1,STRG0A80TKO.XP_040187566.1,STRG0A80TKO.XP_040188540.1,STRG0A80TKO.XP_040189101.1,STRG0A80TKO.XP_040196455.1,STRG0A80TKO.XP_040196726.1,STRG0A80TKO.XP_040197490.1,STRG0A80TKO.XP_040197770.1,STRG0A80TKO.XP_040201846.1,STRG0A80TKO.XP_040214152.1,STRG0A80TKO.XP_040214157.1,STRG0A80TKO.XP_040215573.1,STRG0A80TKO.XP_040217370.1
GO:0032806	Carboxy-terminal domain protein kinase complex	9	35	1.14	1.45e-06	STRG0A80TKO.XP_040183928.1,STRG0A80TKO.XP_040187566.1,STRG0A80TKO.XP_040188540.1,STRG0A80TKO.XP_040189101.1,STRG0A80TKO.XP_040196455.1,STRG0A80TKO.XP_040196726.1,STRG0A80TKO.XP_040197490.1,STRG0A80TKO.XP_040197770.1,STRG0A80TKO.XP_040214157.1
GO:0000307	Cyclin-dependent protein kinase holoenzyme complex	7	67	0.75	0.0042	STRG0A80TKO.XP_040187566.1,STRG0A80TKO.XP_040188540.1,STRG0A80TKO.XP_040189101.1,STRG0A80TKO.XP_040196455.1,STRG0A80TKO.XP_040197770.1,STRG0A80TKO.XP_040201846.1,STRG0A80TKO.XP_040217370.1
GO:0019908	Nuclear cyclin-dependent protein kinase holoenzyme complex	6	23	1.15	0.00016	STRG0A80TKO.XP_040187566.1,STRG0A80TKO.XP_040188540.1,STRG0A80TKO.XP_040189101.1,STRG0A80TKO.XP_040196455.1,STRG0A80TKO.XP_040197770.1,STRG0A80TKO.XP_040217370.1
GO:0019907	Cyclin-dependent protein kinase activating kinase holoenzyme complex	3	4	1.61	0.0022	STRG0A80TKO.XP_040189101.1,STRG0A80TKO.XP_040196455.1,STRG0A80TKO.XP_040197770.1
GO:0005657	Replication fork	23	88	1.15	1.69e-16	STRG0A80TKO.XP_040176722.1,STRG0A80TKO.XP_040181278.1,STRG0A80TKO.XP_040182364.1,STRG0A80TKO.XP_040183499.1,STRG0A80TKO.XP_040183833.1,STRG0A80TKO.XP_040184574.1,STRG0A80TKO.XP_040189567.1,STRG0A80TKO.XP_040191057.1,STRG0A80TKO.XP_040192638.1,STRG0A80TKO.XP_040194138.1,STRG0A80TKO.XP_040194306.1,STRG0A80TKO.XP_040195724.1,STRG0A80TKO.XP_040196095.1,STRG0A80TKO.XP_040196351.1,STRG0A80TKO.XP_040196…
GO:0043596	Nuclear replication fork	15	46	1.25	5.64e-12	STRG0A80TKO.XP_040176722.1,STRG0A80TKO.XP_040183499.1,STRG0A80TKO.XP_040183833.1,STRG0A80TKO.XP_040184574.1,STRG0A80TKO.XP_040189567.1,STRG0A80TKO.XP_040194138.1,STRG0A80TKO.XP_040194306.1,STRG0A80TKO.XP_040195724.1,STRG0A80TKO.XP_040196918.1,STRG0A80TKO.XP_040196981.1,STRG0A80TKO.XP_040201846.1,STRG0A80TKO.XP_040201981.1,STRG0A80TKO.XP_040205825.1,STRG0A80TKO.XP_040208214.1,STRG0A80TKO.XP_040214…
GO:0005663	DNA replication factor C complex	5	9	1.48	5.01e-05	STRG0A80TKO.XP_040191057.1,STRG0A80TKO.XP_040192638.1,STRG0A80TKO.XP_040196351.1,STRG0A80TKO.XP_040201776.1,STRG0A80TKO.XP_040205391.1
GO:0005662	DNA replication factor A complex	3	7	1.36	0.0065	STRG0A80TKO.XP_040176722.1,STRG0A80TKO.XP_040194306.1,STRG0A80TKO.XP_040208214.1
GO:0030684	Preribosome	46	84	1.47	1.38e-44	STRG0A80TKO.XP_040176959.1,STRG0A80TKO.XP_040179885.1,STRG0A80TKO.XP_040180183.1,STRG0A80TKO.XP_040181892.1,STRG0A80TKO.XP_040182213.1,STRG0A80TKO.XP_040182723.1,STRG0A80TKO.XP_040183131.1,STRG0A80TKO.XP_040183560.1,STRG0A80TKO.XP_040185151.1,STRG0A80TKO.XP_040185169.1,STRG0A80TKO.XP_040185542.1,STRG0A80TKO.XP_040186700.1,STRG0A80TKO.XP_040188087.1,STRG0A80TKO.XP_040188584.1,STRG0A80TKO.XP_040190…
GO:0005840	Ribosome	39	311	0.83	7.82e-18	STRG0A80TKO.XP_040176748.1,STRG0A80TKO.XP_040178757.1,STRG0A80TKO.XP_040179536.1,STRG0A80TKO.XP_040179932.1,STRG0A80TKO.XP_040180237.1,STRG0A80TKO.XP_040180925.1,STRG0A80TKO.XP_040181583.1,STRG0A80TKO.XP_040181644.1,STRG0A80TKO.XP_040182071.1,STRG0A80TKO.XP_040185554.1,STRG0A80TKO.XP_040185709.1,STRG0A80TKO.XP_040185737.1,STRG0A80TKO.XP_040186919.1,STRG0A80TKO.XP_040187638.1,STRG0A80TKO.XP_040190…
GO:0022626	Cytosolic ribosome	37	161	1.09	1.05e-24	STRG0A80TKO.XP_040176748.1,STRG0A80TKO.XP_040178757.1,STRG0A80TKO.XP_040179536.1,STRG0A80TKO.XP_040179932.1,STRG0A80TKO.XP_040180237.1,STRG0A80TKO.XP_040180925.1,STRG0A80TKO.XP_040181583.1,STRG0A80TKO.XP_040181644.1,STRG0A80TKO.XP_040182071.1,STRG0A80TKO.XP_040185554.1,STRG0A80TKO.XP_040185709.1,STRG0A80TKO.XP_040185737.1,STRG0A80TKO.XP_040186919.1,STRG0A80TKO.XP_040187638.1,STRG0A80TKO.XP_040190…
GO:0044391	Ribosomal subunit	37	263	0.88	2.26e-18	STRG0A80TKO.XP_040176748.1,STRG0A80TKO.XP_040178757.1,STRG0A80TKO.XP_040179536.1,STRG0A80TKO.XP_040179932.1,STRG0A80TKO.XP_040180237.1,STRG0A80TKO.XP_040180925.1,STRG0A80TKO.XP_040181583.1,STRG0A80TKO.XP_040181644.1,STRG0A80TKO.XP_040182071.1,STRG0A80TKO.XP_040185554.1,STRG0A80TKO.XP_040185709.1,STRG0A80TKO.XP_040185737.1,STRG0A80TKO.XP_040186919.1,STRG0A80TKO.XP_040187638.1,STRG0A80TKO.XP_040190…
GO:0022625	Cytosolic large ribosomal subunit	31	105	1.2	1.96e-23	STRG0A80TKO.XP_040176748.1,STRG0A80TKO.XP_040179536.1,STRG0A80TKO.XP_040179932.1,STRG0A80TKO.XP_040180237.1,STRG0A80TKO.XP_040181583.1,STRG0A80TKO.XP_040181644.1,STRG0A80TKO.XP_040182071.1,STRG0A80TKO.XP_040185554.1,STRG0A80TKO.XP_040185709.1,STRG0A80TKO.XP_040185737.1,STRG0A80TKO.XP_040186919.1,STRG0A80TKO.XP_040187638.1,STRG0A80TKO.XP_040191055.1,STRG0A80TKO.XP_040192372.1,STRG0A80TKO.XP_040192…
GO:0032040	Small-subunit processome	25	46	1.47	4.58e-24	STRG0A80TKO.XP_040180183.1,STRG0A80TKO.XP_040182213.1,STRG0A80TKO.XP_040183131.1,STRG0A80TKO.XP_040185151.1,STRG0A80TKO.XP_040185169.1,STRG0A80TKO.XP_040186700.1,STRG0A80TKO.XP_040188087.1,STRG0A80TKO.XP_040191984.1,STRG0A80TKO.XP_040193023.1,STRG0A80TKO.XP_040193135.1,STRG0A80TKO.XP_040195852.1,STRG0A80TKO.XP_040198751.1,STRG0A80TKO.XP_040199234.1,STRG0A80TKO.XP_040199908.1,STRG0A80TKO.XP_040200…
GO:0030686	90S preribosome	21	31	1.56	1.06e-21	STRG0A80TKO.XP_040180183.1,STRG0A80TKO.XP_040181892.1,STRG0A80TKO.XP_040185151.1,STRG0A80TKO.XP_040185169.1,STRG0A80TKO.XP_040186700.1,STRG0A80TKO.XP_040188584.1,STRG0A80TKO.XP_040190289.1,STRG0A80TKO.XP_040191984.1,STRG0A80TKO.XP_040193023.1,STRG0A80TKO.XP_040195852.1,STRG0A80TKO.XP_040198751.1,STRG0A80TKO.XP_040199234.1,STRG0A80TKO.XP_040200065.1,STRG0A80TKO.XP_040200250.1,STRG0A80TKO.XP_040203…
GO:0030687	Preribosome, large subunit precursor	16	21	1.61	3.48e-17	STRG0A80TKO.XP_040176959.1,STRG0A80TKO.XP_040179885.1,STRG0A80TKO.XP_040181892.1,STRG0A80TKO.XP_040182723.1,STRG0A80TKO.XP_040183560.1,STRG0A80TKO.XP_040185542.1,STRG0A80TKO.XP_040190289.1,STRG0A80TKO.XP_040197367.1,STRG0A80TKO.XP_040202058.1,STRG0A80TKO.XP_040203696.1,STRG0A80TKO.XP_040207371.1,STRG0A80TKO.XP_040208033.1,STRG0A80TKO.XP_040210272.1,STRG0A80TKO.XP_040213178.1,STRG0A80TKO.XP_040216…
GO:0022627	Cytosolic small ribosomal subunit	6	53	0.79	0.007	STRG0A80TKO.XP_040178757.1,STRG0A80TKO.XP_040180925.1,STRG0A80TKO.XP_040190431.1,STRG0A80TKO.XP_040193736.1,STRG0A80TKO.XP_040204593.1,STRG0A80TKO.XP_040216887.1
GO:0034388	Pwp2p-containing subcomplex of 90S preribosome	4	8	1.43	0.00059	STRG0A80TKO.XP_040185169.1,STRG0A80TKO.XP_040186700.1,STRG0A80TKO.XP_040199234.1,STRG0A80TKO.XP_040211280.1
GO:0030688	Preribosome, small subunit precursor	4	13	1.22	0.0023	STRG0A80TKO.XP_040176959.1,STRG0A80TKO.XP_040188584.1,STRG0A80TKO.XP_040193630.1,STRG0A80TKO.XP_040203644.1
GO:0042788	Polysomal ribosome	4	30	0.86	0.0267	STRG0A80TKO.XP_040181583.1,STRG0A80TKO.XP_040187638.1,STRG0A80TKO.XP_040202090.1,STRG0A80TKO.XP_040216252.1
GO:0034457	Mpp10 complex	3	3	1.73	0.0014	STRG0A80TKO.XP_040180183.1,STRG0A80TKO.XP_040193023.1,STRG0A80TKO.XP_040198751.1
GO:0034455	t-UTP complex	3	3	1.73	0.0014	STRG0A80TKO.XP_040185151.1,STRG0A80TKO.XP_040185707.1,STRG0A80TKO.XP_040195852.1
GO:0070545	PeBoW complex	3	4	1.61	0.0022	STRG0A80TKO.XP_040190289.1,STRG0A80TKO.XP_040208033.1,STRG0A80TKO.XP_040213178.1
GO:0034456	UTP-C complex	2	2	1.73	0.0171	STRG0A80TKO.XP_040191984.1,STRG0A80TKO.XP_040216681.1
GO:0030689	Noc complex	2	3	1.56	0.0267	STRG0A80TKO.XP_040181892.1,STRG0A80TKO.XP_040203644.1
GO:0032545	CURI complex	2	2	1.73	0.0171	STRG0A80TKO.XP_040191984.1,STRG0A80TKO.XP_040216681.1
GO:0055029	Nuclear DNA-directed RNA polymerase complex	30	148	1.04	1.03e-18	STRG0A80TKO.XP_040176540.1,STRG0A80TKO.XP_040179534.1,STRG0A80TKO.XP_040179941.1,STRG0A80TKO.XP_040180466.1,STRG0A80TKO.XP_040183928.1,STRG0A80TKO.XP_040184574.1,STRG0A80TKO.XP_040186503.1,STRG0A80TKO.XP_040189101.1,STRG0A80TKO.XP_040189870.1,STRG0A80TKO.XP_040190145.1,STRG0A80TKO.XP_040190396.1,STRG0A80TKO.XP_040190437.1,STRG0A80TKO.XP_040191174.1,STRG0A80TKO.XP_040194138.1,STRG0A80TKO.XP_040196…
GO:0016591	RNA polymerase II, holoenzyme	17	112	0.91	4.99e-09	STRG0A80TKO.XP_040179534.1,STRG0A80TKO.XP_040179941.1,STRG0A80TKO.XP_040180466.1,STRG0A80TKO.XP_040183928.1,STRG0A80TKO.XP_040186503.1,STRG0A80TKO.XP_040189101.1,STRG0A80TKO.XP_040190145.1,STRG0A80TKO.XP_040190437.1,STRG0A80TKO.XP_040196455.1,STRG0A80TKO.XP_040196726.1,STRG0A80TKO.XP_040197213.1,STRG0A80TKO.XP_040197490.1,STRG0A80TKO.XP_040197770.1,STRG0A80TKO.XP_040202519.1,STRG0A80TKO.XP_040205…
GO:0005736	RNA polymerase I complex	7	20	1.28	6.61e-06	STRG0A80TKO.XP_040179941.1,STRG0A80TKO.XP_040190396.1,STRG0A80TKO.XP_040191174.1,STRG0A80TKO.XP_040205713.1,STRG0A80TKO.XP_040207012.1,STRG0A80TKO.XP_040207681.1,STRG0A80TKO.XP_040217591.1
GO:0005666	RNA polymerase III complex	7	28	1.13	4.08e-05	STRG0A80TKO.XP_040176540.1,STRG0A80TKO.XP_040179941.1,STRG0A80TKO.XP_040189870.1,STRG0A80TKO.XP_040202092.1,STRG0A80TKO.XP_040205713.1,STRG0A80TKO.XP_040207136.1,STRG0A80TKO.XP_040207681.1
GO:0005665	RNA polymerase II, core complex	4	16	1.13	0.0044	STRG0A80TKO.XP_040179534.1,STRG0A80TKO.XP_040179941.1,STRG0A80TKO.XP_040190145.1,STRG0A80TKO.XP_040205713.1
GO:0034518	RNA cap binding complex	4	18	1.08	0.0062	STRG0A80TKO.XP_040198194.1,STRG0A80TKO.XP_040203655.1,STRG0A80TKO.XP_040209850.1,STRG0A80TKO.XP_040217018.1
GO:0005845	mRNA cap binding complex	3	17	0.98	0.0424	STRG0A80TKO.XP_040198194.1,STRG0A80TKO.XP_040209850.1,STRG0A80TKO.XP_040217018.1
GO:0005846	Nuclear cap binding complex	2	4	1.43	0.0377	STRG0A80TKO.XP_040203655.1,STRG0A80TKO.XP_040217018.1
GO:0005732	sno(s)RNA-containing ribonucleoprotein complex	9	33	1.17	9.52e-07	STRG0A80TKO.XP_040176343.1,STRG0A80TKO.XP_040178726.1,STRG0A80TKO.XP_040183131.1,STRG0A80TKO.XP_040185123.1,STRG0A80TKO.XP_040188087.1,STRG0A80TKO.XP_040198751.1,STRG0A80TKO.XP_040208718.1,STRG0A80TKO.XP_040213166.1,STRG0A80TKO.XP_040215571.1
GO:0031428	Box C/D RNP complex	5	6	1.65	1.28e-05	STRG0A80TKO.XP_040176343.1,STRG0A80TKO.XP_040183131.1,STRG0A80TKO.XP_040188087.1,STRG0A80TKO.XP_040213166.1,STRG0A80TKO.XP_040215571.1
GO:0031429	Box H/ACA snoRNP complex	4	5	1.64	0.00017	STRG0A80TKO.XP_040176343.1,STRG0A80TKO.XP_040178726.1,STRG0A80TKO.XP_040185123.1,STRG0A80TKO.XP_040208718.1
GO:0090661	Box H/ACA telomerase RNP complex	3	4	1.61	0.0022	STRG0A80TKO.XP_040178726.1,STRG0A80TKO.XP_040185123.1,STRG0A80TKO.XP_040208718.1
GO:0005819	Spindle	26	624	0.35	0.0021	STRG0A80TKO.XP_040176449.1,STRG0A80TKO.XP_040176722.1,STRG0A80TKO.XP_040180654.1,STRG0A80TKO.XP_040185403.1,STRG0A80TKO.XP_040186173.1,STRG0A80TKO.XP_040187071.1,STRG0A80TKO.XP_040187425.1,STRG0A80TKO.XP_040187602.1,STRG0A80TKO.XP_040188643.1,STRG0A80TKO.XP_040189796.1,STRG0A80TKO.XP_040190033.1,STRG0A80TKO.XP_040190311.1,STRG0A80TKO.XP_040191369.1,STRG0A80TKO.XP_040196161.1,STRG0A80TKO.XP_040196…
GO:0000922	Spindle pole	15	240	0.53	0.00094	STRG0A80TKO.XP_040180654.1,STRG0A80TKO.XP_040186173.1,STRG0A80TKO.XP_040187425.1,STRG0A80TKO.XP_040187602.1,STRG0A80TKO.XP_040190033.1,STRG0A80TKO.XP_040191369.1,STRG0A80TKO.XP_040200615.1,STRG0A80TKO.XP_040200718.1,STRG0A80TKO.XP_040202700.1,STRG0A80TKO.XP_040204987.1,STRG0A80TKO.XP_040207513.1,STRG0A80TKO.XP_040209544.1,STRG0A80TKO.XP_040209782.1,STRG0A80TKO.XP_040212624.1,STRG0A80TKO.XP_040217…
GO:0000776	Kinetochore	13	210	0.52	0.0027	STRG0A80TKO.XP_040180654.1,STRG0A80TKO.XP_040186173.1,STRG0A80TKO.XP_040186730.1,STRG0A80TKO.XP_040187071.1,STRG0A80TKO.XP_040189977.1,STRG0A80TKO.XP_040190311.1,STRG0A80TKO.XP_040191369.1,STRG0A80TKO.XP_040199973.1,STRG0A80TKO.XP_040200615.1,STRG0A80TKO.XP_040207052.1,STRG0A80TKO.XP_040212624.1,STRG0A80TKO.XP_040216898.1,STRG0A80TKO.XP_040217274.1
GO:0051233	Spindle midzone	6	61	0.72	0.013	STRG0A80TKO.XP_040185403.1,STRG0A80TKO.XP_040187425.1,STRG0A80TKO.XP_040190033.1,STRG0A80TKO.XP_040202700.1,STRG0A80TKO.XP_040209782.1,STRG0A80TKO.XP_040213931.1
GO:0005681	Spliceosomal complex	68	270	1.13	5.61e-48	STRG0A80TKO.XP_040176558.1,STRG0A80TKO.XP_040176722.1,STRG0A80TKO.XP_040178651.1,STRG0A80TKO.XP_040179192.1,STRG0A80TKO.XP_040179415.1,STRG0A80TKO.XP_040179690.1,STRG0A80TKO.XP_040179694.1,STRG0A80TKO.XP_040180258.1,STRG0A80TKO.XP_040180621.1,STRG0A80TKO.XP_040181557.1,STRG0A80TKO.XP_040182215.1,STRG0A80TKO.XP_040184033.1,STRG0A80TKO.XP_040184711.1,STRG0A80TKO.XP_040184759.1,STRG0A80TKO.XP_040185…
GO:0005684	U2-type spliceosomal complex	40	128	1.23	4.53e-31	STRG0A80TKO.XP_040176722.1,STRG0A80TKO.XP_040179192.1,STRG0A80TKO.XP_040179415.1,STRG0A80TKO.XP_040180258.1,STRG0A80TKO.XP_040181557.1,STRG0A80TKO.XP_040184033.1,STRG0A80TKO.XP_040184759.1,STRG0A80TKO.XP_040185255.1,STRG0A80TKO.XP_040185647.1,STRG0A80TKO.XP_040186827.1,STRG0A80TKO.XP_040187364.1,STRG0A80TKO.XP_040188196.1,STRG0A80TKO.XP_040189285.1,STRG0A80TKO.XP_040189563.1,STRG0A80TKO.XP_040191…
GO:0071013	Catalytic step 2 spliceosome	36	117	1.22	9.81e-28	STRG0A80TKO.XP_040176722.1,STRG0A80TKO.XP_040179192.1,STRG0A80TKO.XP_040179415.1,STRG0A80TKO.XP_040184033.1,STRG0A80TKO.XP_040184759.1,STRG0A80TKO.XP_040185255.1,STRG0A80TKO.XP_040185476.1,STRG0A80TKO.XP_040185647.1,STRG0A80TKO.XP_040187022.1,STRG0A80TKO.XP_040187364.1,STRG0A80TKO.XP_040188196.1,STRG0A80TKO.XP_040189285.1,STRG0A80TKO.XP_040192888.1,STRG0A80TKO.XP_040193079.1,STRG0A80TKO.XP_040193…
GO:0097525	Spliceosomal snRNP complex	26	90	1.19	1.85e-19	STRG0A80TKO.XP_040179192.1,STRG0A80TKO.XP_040179415.1,STRG0A80TKO.XP_040180258.1,STRG0A80TKO.XP_040184759.1,STRG0A80TKO.XP_040185255.1,STRG0A80TKO.XP_040185647.1,STRG0A80TKO.XP_040186827.1,STRG0A80TKO.XP_040187364.1,STRG0A80TKO.XP_040189563.1,STRG0A80TKO.XP_040193144.1,STRG0A80TKO.XP_040194317.1,STRG0A80TKO.XP_040197123.1,STRG0A80TKO.XP_040198249.1,STRG0A80TKO.XP_040199347.1,STRG0A80TKO.XP_040199…
GO:0071011	Precatalytic spliceosome	21	75	1.18	1.37e-15	STRG0A80TKO.XP_040179192.1,STRG0A80TKO.XP_040179415.1,STRG0A80TKO.XP_040180258.1,STRG0A80TKO.XP_040184759.1,STRG0A80TKO.XP_040185255.1,STRG0A80TKO.XP_040185647.1,STRG0A80TKO.XP_040187364.1,STRG0A80TKO.XP_040189563.1,STRG0A80TKO.XP_040193144.1,STRG0A80TKO.XP_040194317.1,STRG0A80TKO.XP_040196194.1,STRG0A80TKO.XP_040198249.1,STRG0A80TKO.XP_040199688.1,STRG0A80TKO.XP_040201868.1,STRG0A80TKO.XP_040204…
GO:0071005	U2-type precatalytic spliceosome	20	66	1.21	2.07e-15	STRG0A80TKO.XP_040179192.1,STRG0A80TKO.XP_040179415.1,STRG0A80TKO.XP_040180258.1,STRG0A80TKO.XP_040184759.1,STRG0A80TKO.XP_040185255.1,STRG0A80TKO.XP_040185647.1,STRG0A80TKO.XP_040187364.1,STRG0A80TKO.XP_040189563.1,STRG0A80TKO.XP_040193144.1,STRG0A80TKO.XP_040194317.1,STRG0A80TKO.XP_040196194.1,STRG0A80TKO.XP_040198249.1,STRG0A80TKO.XP_040199688.1,STRG0A80TKO.XP_040201868.1,STRG0A80TKO.XP_040205…
GO:0046540	U4/U6 x U5 tri-snRNP complex	14	46	1.22	7.26e-11	STRG0A80TKO.XP_040179415.1,STRG0A80TKO.XP_040180258.1,STRG0A80TKO.XP_040185647.1,STRG0A80TKO.XP_040187364.1,STRG0A80TKO.XP_040189563.1,STRG0A80TKO.XP_040194317.1,STRG0A80TKO.XP_040197123.1,STRG0A80TKO.XP_040199347.1,STRG0A80TKO.XP_040199688.1,STRG0A80TKO.XP_040201868.1,STRG0A80TKO.XP_040201906.1,STRG0A80TKO.XP_040205349.1,STRG0A80TKO.XP_040214816.1,STRG0A80TKO.XP_040215571.1
GO:0071007	U2-type catalytic step 2 spliceosome	13	36	1.29	7.26e-11	STRG0A80TKO.XP_040176722.1,STRG0A80TKO.XP_040187364.1,STRG0A80TKO.XP_040188196.1,STRG0A80TKO.XP_040189285.1,STRG0A80TKO.XP_040192888.1,STRG0A80TKO.XP_040193374.1,STRG0A80TKO.XP_040194317.1,STRG0A80TKO.XP_040198249.1,STRG0A80TKO.XP_040202196.1,STRG0A80TKO.XP_040205349.1,STRG0A80TKO.XP_040207119.1,STRG0A80TKO.XP_040208182.1,STRG0A80TKO.XP_040209611.1
GO:0005686	U2 snRNP	10	27	1.3	1.73e-08	STRG0A80TKO.XP_040179192.1,STRG0A80TKO.XP_040184759.1,STRG0A80TKO.XP_040185255.1,STRG0A80TKO.XP_040193144.1,STRG0A80TKO.XP_040198249.1,STRG0A80TKO.XP_040204442.1,STRG0A80TKO.XP_040205349.1,STRG0A80TKO.XP_040207949.1,STRG0A80TKO.XP_040213054.1,STRG0A80TKO.XP_040215396.1
GO:0000974	Prp19 complex	9	10	1.69	3.58e-10	STRG0A80TKO.XP_040176722.1,STRG0A80TKO.XP_040186506.1,STRG0A80TKO.XP_040193374.1,STRG0A80TKO.XP_040202196.1,STRG0A80TKO.XP_040204365.1,STRG0A80TKO.XP_040207119.1,STRG0A80TKO.XP_040208182.1,STRG0A80TKO.XP_040209611.1,STRG0A80TKO.XP_040215284.1
GO:0071014	post-mRNA release spliceosomal complex	9	14	1.54	2.92e-09	STRG0A80TKO.XP_040184033.1,STRG0A80TKO.XP_040191117.1,STRG0A80TKO.XP_040198591.1,STRG0A80TKO.XP_040201090.1,STRG0A80TKO.XP_040202196.1,STRG0A80TKO.XP_040207119.1,STRG0A80TKO.XP_040208182.1,STRG0A80TKO.XP_040211165.1,STRG0A80TKO.XP_040215284.1
GO:0071004	U2-type prespliceosome	7	32	1.07	8.41e-05	STRG0A80TKO.XP_040179192.1,STRG0A80TKO.XP_040181557.1,STRG0A80TKO.XP_040186827.1,STRG0A80TKO.XP_040207949.1,STRG0A80TKO.XP_040212972.1,STRG0A80TKO.XP_040213054.1,STRG0A80TKO.XP_040213881.1
GO:0005689	U12-type spliceosomal complex	7	44	0.93	0.00047	STRG0A80TKO.XP_040184759.1,STRG0A80TKO.XP_040185255.1,STRG0A80TKO.XP_040191117.1,STRG0A80TKO.XP_040204442.1,STRG0A80TKO.XP_040205349.1,STRG0A80TKO.XP_040213054.1,STRG0A80TKO.XP_040215396.1
GO:0071006	U2-type catalytic step 1 spliceosome	6	15	1.33	2.32e-05	STRG0A80TKO.XP_040176722.1,STRG0A80TKO.XP_040194317.1,STRG0A80TKO.XP_040201868.1,STRG0A80TKO.XP_040207006.1,STRG0A80TKO.XP_040209611.1,STRG0A80TKO.XP_040215284.1
GO:0005682	U5 snRNP	6	19	1.23	6.69e-05	STRG0A80TKO.XP_040185647.1,STRG0A80TKO.XP_040194317.1,STRG0A80TKO.XP_040197123.1,STRG0A80TKO.XP_040199347.1,STRG0A80TKO.XP_040201868.1,STRG0A80TKO.XP_040205349.1
GO:0005685	U1 snRNP	4	36	0.78	0.0456	STRG0A80TKO.XP_040186827.1,STRG0A80TKO.XP_040205349.1,STRG0A80TKO.XP_040212972.1,STRG0A80TKO.XP_040213881.1
GO:0120115	Lsm2-8 complex	3	8	1.31	0.0085	STRG0A80TKO.XP_040179415.1,STRG0A80TKO.XP_040199688.1,STRG0A80TKO.XP_040214816.1
GO:0072669	tRNA-splicing ligase complex	3	10	1.21	0.0139	STRG0A80TKO.XP_040189796.1,STRG0A80TKO.XP_040201586.1,STRG0A80TKO.XP_040204502.1
GO:0005688	U6 snRNP	3	11	1.17	0.0168	STRG0A80TKO.XP_040179415.1,STRG0A80TKO.XP_040199688.1,STRG0A80TKO.XP_040214816.1
GO:0089701	U2AF complex	3	9	1.25	0.011	STRG0A80TKO.XP_040180621.1,STRG0A80TKO.XP_040181557.1,STRG0A80TKO.XP_040184711.1
GO:0071020	Post-spliceosomal complex	2	3	1.56	0.0267	STRG0A80TKO.XP_040199347.1,STRG0A80TKO.XP_040215284.1
GO:0071008	U2-type post-mRNA release spliceosomal complex	2	4	1.43	0.0377	STRG0A80TKO.XP_040184033.1,STRG0A80TKO.XP_040191117.1
GO:0070603	SWI/SNF superfamily-type complex	20	242	0.65	1.58e-06	STRG0A80TKO.XP_040176520.1,STRG0A80TKO.XP_040180247.1,STRG0A80TKO.XP_040181670.1,STRG0A80TKO.XP_040184579.1,STRG0A80TKO.XP_040184882.1,STRG0A80TKO.XP_040186305.1,STRG0A80TKO.XP_040187444.1,STRG0A80TKO.XP_040188032.1,STRG0A80TKO.XP_040192641.1,STRG0A80TKO.XP_040192808.1,STRG0A80TKO.XP_040193939.1,STRG0A80TKO.XP_040194262.1,STRG0A80TKO.XP_040196208.1,STRG0A80TKO.XP_040202396.1,STRG0A80TKO.XP_040205…
GO:0071565	nBAF complex	6	53	0.79	0.007	STRG0A80TKO.XP_040184579.1,STRG0A80TKO.XP_040186305.1,STRG0A80TKO.XP_040193939.1,STRG0A80TKO.XP_040196208.1,STRG0A80TKO.XP_040202396.1,STRG0A80TKO.XP_040211266.1
GO:0031010	ISWI-type complex	5	23	1.07	0.0016	STRG0A80TKO.XP_040180247.1,STRG0A80TKO.XP_040187444.1,STRG0A80TKO.XP_040188032.1,STRG0A80TKO.XP_040192808.1,STRG0A80TKO.XP_040194262.1
GO:0071564	npBAF complex	5	45	0.78	0.0182	STRG0A80TKO.XP_040186305.1,STRG0A80TKO.XP_040193939.1,STRG0A80TKO.XP_040196208.1,STRG0A80TKO.XP_040202396.1,STRG0A80TKO.XP_040211266.1
GO:0008623	CHRAC	2	3	1.56	0.0267	STRG0A80TKO.XP_040180247.1,STRG0A80TKO.XP_040188032.1
GO:0005667	Transcription regulator complex	27	837	0.24	0.0403	STRG0A80TKO.XP_040176520.1,STRG0A80TKO.XP_040180466.1,STRG0A80TKO.XP_040180474.1,STRG0A80TKO.XP_040183506.1,STRG0A80TKO.XP_040183928.1,STRG0A80TKO.XP_040184882.1,STRG0A80TKO.XP_040186951.1,STRG0A80TKO.XP_040187291.1,STRG0A80TKO.XP_040189101.1,STRG0A80TKO.XP_040190437.1,STRG0A80TKO.XP_040192808.1,STRG0A80TKO.XP_040193759.1,STRG0A80TKO.XP_040194036.1,STRG0A80TKO.XP_040196455.1,STRG0A80TKO.XP_040196…
GO:0090575	RNA polymerase II transcription regulator complex	18	379	0.41	0.0044	STRG0A80TKO.XP_040180466.1,STRG0A80TKO.XP_040183506.1,STRG0A80TKO.XP_040183928.1,STRG0A80TKO.XP_040186951.1,STRG0A80TKO.XP_040187291.1,STRG0A80TKO.XP_040189101.1,STRG0A80TKO.XP_040190437.1,STRG0A80TKO.XP_040194036.1,STRG0A80TKO.XP_040196455.1,STRG0A80TKO.XP_040196726.1,STRG0A80TKO.XP_040197173.1,STRG0A80TKO.XP_040197213.1,STRG0A80TKO.XP_040197490.1,STRG0A80TKO.XP_040197770.1,STRG0A80TKO.XP_040202…
GO:0000118	Histone deacetylase complex	10	206	0.42	0.0499	STRG0A80TKO.XP_040176520.1,STRG0A80TKO.XP_040178555.1,STRG0A80TKO.XP_040181670.1,STRG0A80TKO.XP_040184882.1,STRG0A80TKO.XP_040192808.1,STRG0A80TKO.XP_040198913.1,STRG0A80TKO.XP_040200278.1,STRG0A80TKO.XP_040206198.1,STRG0A80TKO.XP_040214904.1,STRG0A80TKO.XP_040217126.1
GO:0000439	Transcription factor TFIIH core complex	7	17	1.35	2.83e-06	STRG0A80TKO.XP_040183928.1,STRG0A80TKO.XP_040189101.1,STRG0A80TKO.XP_040196455.1,STRG0A80TKO.XP_040196726.1,STRG0A80TKO.XP_040197490.1,STRG0A80TKO.XP_040197770.1,STRG0A80TKO.XP_040214157.1
GO:0005675	Transcription factor TFIIH holo complex	7	17	1.35	2.83e-06	STRG0A80TKO.XP_040183928.1,STRG0A80TKO.XP_040189101.1,STRG0A80TKO.XP_040196455.1,STRG0A80TKO.XP_040196726.1,STRG0A80TKO.XP_040197490.1,STRG0A80TKO.XP_040197770.1,STRG0A80TKO.XP_040214157.1
GO:0005669	Transcription factor TFIID complex	6	41	0.9	0.0022	STRG0A80TKO.XP_040180466.1,STRG0A80TKO.XP_040190437.1,STRG0A80TKO.XP_040196726.1,STRG0A80TKO.XP_040202519.1,STRG0A80TKO.XP_040214157.1,STRG0A80TKO.XP_040216008.1
GO:0070985	Transcription factor TFIIK complex	3	4	1.61	0.0022	STRG0A80TKO.XP_040189101.1,STRG0A80TKO.XP_040196455.1,STRG0A80TKO.XP_040197770.1
GO:0005674	Transcription factor TFIIF complex	2	2	1.73	0.0171	STRG0A80TKO.XP_040197213.1,STRG0A80TKO.XP_040202519.1
GO:0005673	Transcription factor TFIIE complex	2	3	1.56	0.0267	STRG0A80TKO.XP_040180466.1,STRG0A80TKO.XP_040190437.1
GO:1990234	Transferase complex	69	1425	0.42	5.6e-11	STRG0A80TKO.XP_040176540.1,STRG0A80TKO.XP_040178880.1,STRG0A80TKO.XP_040179534.1,STRG0A80TKO.XP_040179881.1,STRG0A80TKO.XP_040179885.1,STRG0A80TKO.XP_040179941.1,STRG0A80TKO.XP_040180247.1,STRG0A80TKO.XP_040180466.1,STRG0A80TKO.XP_040181670.1,STRG0A80TKO.XP_040183499.1,STRG0A80TKO.XP_040183928.1,STRG0A80TKO.XP_040184331.1,STRG0A80TKO.XP_040184574.1,STRG0A80TKO.XP_040186503.1,STRG0A80TKO.XP_040187…
GO:0061695	Transferase complex, transferring phosphorus-containing groups	42	446	0.71	3.62e-15	STRG0A80TKO.XP_040176540.1,STRG0A80TKO.XP_040179534.1,STRG0A80TKO.XP_040179885.1,STRG0A80TKO.XP_040179941.1,STRG0A80TKO.XP_040180247.1,STRG0A80TKO.XP_040180466.1,STRG0A80TKO.XP_040183499.1,STRG0A80TKO.XP_040183928.1,STRG0A80TKO.XP_040184574.1,STRG0A80TKO.XP_040186503.1,STRG0A80TKO.XP_040187566.1,STRG0A80TKO.XP_040188540.1,STRG0A80TKO.XP_040189101.1,STRG0A80TKO.XP_040189870.1,STRG0A80TKO.XP_040190…
GO:0034708	Methyltransferase complex	13	178	0.6	0.00065	STRG0A80TKO.XP_040178880.1,STRG0A80TKO.XP_040179885.1,STRG0A80TKO.XP_040181670.1,STRG0A80TKO.XP_040187883.1,STRG0A80TKO.XP_040192808.1,STRG0A80TKO.XP_040198194.1,STRG0A80TKO.XP_040202601.1,STRG0A80TKO.XP_040205349.1,STRG0A80TKO.XP_040207624.1,STRG0A80TKO.XP_040208773.1,STRG0A80TKO.XP_040209273.1,STRG0A80TKO.XP_040209850.1,STRG0A80TKO.XP_040214904.1
GO:0071339	MLL1 complex	6	65	0.7	0.0168	STRG0A80TKO.XP_040178880.1,STRG0A80TKO.XP_040179885.1,STRG0A80TKO.XP_040181670.1,STRG0A80TKO.XP_040202601.1,STRG0A80TKO.XP_040209273.1,STRG0A80TKO.XP_040214904.1
GO:0031371	Ubiquitin conjugating enzyme complex	3	10	1.21	0.0139	STRG0A80TKO.XP_040190803.1,STRG0A80TKO.XP_040200063.1,STRG0A80TKO.XP_040210106.1
GO:0031533	mRNA cap methyltransferase complex	2	5	1.33	0.0499	STRG0A80TKO.XP_040198194.1,STRG0A80TKO.XP_040209850.1
GO:0031515	tRNA (m1A) methyltransferase complex	2	5	1.33	0.0499	STRG0A80TKO.XP_040187883.1,STRG0A80TKO.XP_040207624.1
GO:0101031	Chaperone complex	5	35	0.89	0.0074	STRG0A80TKO.XP_040181670.1,STRG0A80TKO.XP_040191523.1,STRG0A80TKO.XP_040199954.1,STRG0A80TKO.XP_040214904.1,STRG0A80TKO.XP_040218219.1
GO:0008180	COP9 signalosome	4	24	0.95	0.0142	STRG0A80TKO.XP_040183754.1,STRG0A80TKO.XP_040202690.1,STRG0A80TKO.XP_040212283.1,STRG0A80TKO.XP_040213466.1
GO:0120293	Dynein axonemal particle	4	20	1.03	0.0083	STRG0A80TKO.XP_040178123.1,STRG0A80TKO.XP_040181670.1,STRG0A80TKO.XP_040184977.1,STRG0A80TKO.XP_040214904.1
GO:0034098	VCP-NPL4-UFD1 AAA ATPase complex	3	8	1.31	0.0085	STRG0A80TKO.XP_040191965.1,STRG0A80TKO.XP_040204186.1,STRG0A80TKO.XP_040204718.1
GO:0033597	Mitotic checkpoint complex	2	4	1.43	0.0377	STRG0A80TKO.XP_040186173.1,STRG0A80TKO.XP_040217274.1
GO:0030870	Mre11 complex	3	4	1.61	0.0022	STRG0A80TKO.XP_040196095.1,STRG0A80TKO.XP_040200573.1,STRG0A80TKO.XP_040210535.1
GO:0032039	Integrator complex	10	34	1.2	1.02e-07	STRG0A80TKO.XP_040181187.1,STRG0A80TKO.XP_040181789.1,STRG0A80TKO.XP_040188724.1,STRG0A80TKO.XP_040195881.1,STRG0A80TKO.XP_040196263.1,STRG0A80TKO.XP_040198211.1,STRG0A80TKO.XP_040201531.1,STRG0A80TKO.XP_040204045.1,STRG0A80TKO.XP_040210637.1,STRG0A80TKO.XP_040212636.1
GO:0016604	Nuclear body	103	1071	0.71	2.06e-38	STRG0A80TKO.XP_040176343.1,STRG0A80TKO.XP_040176722.1,STRG0A80TKO.XP_040176757.1,STRG0A80TKO.XP_040178726.1,STRG0A80TKO.XP_040179192.1,STRG0A80TKO.XP_040179943.1,STRG0A80TKO.XP_040180092.1,STRG0A80TKO.XP_040180258.1,STRG0A80TKO.XP_040180466.1,STRG0A80TKO.XP_040180482.1,STRG0A80TKO.XP_040180621.1,STRG0A80TKO.XP_040180948.1,STRG0A80TKO.XP_040181278.1,STRG0A80TKO.XP_040181557.1,STRG0A80TKO.XP_040182…
GO:0005730	Nucleolus	160	1089	0.9	2.5e-85	STRG0A80TKO.XP_040176343.1,STRG0A80TKO.XP_040176748.1,STRG0A80TKO.XP_040176815.1,STRG0A80TKO.XP_040176830.1,STRG0A80TKO.XP_040176959.1,STRG0A80TKO.XP_040178123.1,STRG0A80TKO.XP_040178726.1,STRG0A80TKO.XP_040178793.1,STRG0A80TKO.XP_040179206.1,STRG0A80TKO.XP_040179534.1,STRG0A80TKO.XP_040179941.1,STRG0A80TKO.XP_040179943.1,STRG0A80TKO.XP_040180092.1,STRG0A80TKO.XP_040180183.1,STRG0A80TKO.XP_040180…
GO:0150005	Enzyme activator complex	5	8	1.53	3.34e-05	STRG0A80TKO.XP_040187755.1,STRG0A80TKO.XP_040189101.1,STRG0A80TKO.XP_040196455.1,STRG0A80TKO.XP_040197770.1,STRG0A80TKO.XP_040201846.1
GO:0110165	Cellular anatomical entity	772	38236	0.04	7.42e-22	STRG0A80TKO.XP_040176343.1,STRG0A80TKO.XP_040176449.1,STRG0A80TKO.XP_040176520.1,STRG0A80TKO.XP_040176540.1,STRG0A80TKO.XP_040176558.1,STRG0A80TKO.XP_040176596.1,STRG0A80TKO.XP_040176722.1,STRG0A80TKO.XP_040176729.1,STRG0A80TKO.XP_040176748.1,STRG0A80TKO.XP_040176757.1,STRG0A80TKO.XP_040176793.1,STRG0A80TKO.XP_040176815.1,STRG0A80TKO.XP_040176830.1,STRG0A80TKO.XP_040176844.1,STRG0A80TKO.XP_040176…
GO:0005622	Intracellular anatomical structure	756	28718	0.15	1.55e-90	STRG0A80TKO.XP_040176343.1,STRG0A80TKO.XP_040176449.1,STRG0A80TKO.XP_040176520.1,STRG0A80TKO.XP_040176540.1,STRG0A80TKO.XP_040176558.1,STRG0A80TKO.XP_040176596.1,STRG0A80TKO.XP_040176722.1,STRG0A80TKO.XP_040176729.1,STRG0A80TKO.XP_040176748.1,STRG0A80TKO.XP_040176757.1,STRG0A80TKO.XP_040176793.1,STRG0A80TKO.XP_040176815.1,STRG0A80TKO.XP_040176830.1,STRG0A80TKO.XP_040176844.1,STRG0A80TKO.XP_040176…
GO:0043226	Organelle	699	24679	0.18	2.2e-79	STRG0A80TKO.XP_040176343.1,STRG0A80TKO.XP_040176449.1,STRG0A80TKO.XP_040176520.1,STRG0A80TKO.XP_040176540.1,STRG0A80TKO.XP_040176558.1,STRG0A80TKO.XP_040176596.1,STRG0A80TKO.XP_040176722.1,STRG0A80TKO.XP_040176729.1,STRG0A80TKO.XP_040176748.1,STRG0A80TKO.XP_040176757.1,STRG0A80TKO.XP_040176793.1,STRG0A80TKO.XP_040176815.1,STRG0A80TKO.XP_040176830.1,STRG0A80TKO.XP_040176844.1,STRG0A80TKO.XP_040176…
GO:0043229	Intracellular organelle	693	23910	0.19	1.55e-82	STRG0A80TKO.XP_040176343.1,STRG0A80TKO.XP_040176449.1,STRG0A80TKO.XP_040176520.1,STRG0A80TKO.XP_040176540.1,STRG0A80TKO.XP_040176558.1,STRG0A80TKO.XP_040176596.1,STRG0A80TKO.XP_040176722.1,STRG0A80TKO.XP_040176729.1,STRG0A80TKO.XP_040176748.1,STRG0A80TKO.XP_040176757.1,STRG0A80TKO.XP_040176793.1,STRG0A80TKO.XP_040176815.1,STRG0A80TKO.XP_040176830.1,STRG0A80TKO.XP_040176844.1,STRG0A80TKO.XP_040176…
GO:0043227	Membrane-bounded organelle	652	21740	0.21	2.38e-75	STRG0A80TKO.XP_040176343.1,STRG0A80TKO.XP_040176449.1,STRG0A80TKO.XP_040176520.1,STRG0A80TKO.XP_040176540.1,STRG0A80TKO.XP_040176558.1,STRG0A80TKO.XP_040176596.1,STRG0A80TKO.XP_040176722.1,STRG0A80TKO.XP_040176729.1,STRG0A80TKO.XP_040176748.1,STRG0A80TKO.XP_040176757.1,STRG0A80TKO.XP_040176793.1,STRG0A80TKO.XP_040176815.1,STRG0A80TKO.XP_040176830.1,STRG0A80TKO.XP_040176844.1,STRG0A80TKO.XP_040176…
GO:0043231	Intracellular membrane-bounded organelle	645	20825	0.22	5.22e-80	STRG0A80TKO.XP_040176343.1,STRG0A80TKO.XP_040176449.1,STRG0A80TKO.XP_040176520.1,STRG0A80TKO.XP_040176540.1,STRG0A80TKO.XP_040176558.1,STRG0A80TKO.XP_040176596.1,STRG0A80TKO.XP_040176722.1,STRG0A80TKO.XP_040176729.1,STRG0A80TKO.XP_040176748.1,STRG0A80TKO.XP_040176757.1,STRG0A80TKO.XP_040176793.1,STRG0A80TKO.XP_040176815.1,STRG0A80TKO.XP_040176830.1,STRG0A80TKO.XP_040176844.1,STRG0A80TKO.XP_040176…
GO:0005634	Nucleus	615	13095	0.4	7.9e-160	STRG0A80TKO.XP_040176343.1,STRG0A80TKO.XP_040176449.1,STRG0A80TKO.XP_040176520.1,STRG0A80TKO.XP_040176540.1,STRG0A80TKO.XP_040176558.1,STRG0A80TKO.XP_040176596.1,STRG0A80TKO.XP_040176722.1,STRG0A80TKO.XP_040176729.1,STRG0A80TKO.XP_040176748.1,STRG0A80TKO.XP_040176757.1,STRG0A80TKO.XP_040176793.1,STRG0A80TKO.XP_040176815.1,STRG0A80TKO.XP_040176830.1,STRG0A80TKO.XP_040176844.1,STRG0A80TKO.XP_040176…
GO:0032991	Protein-containing complex	445	9272	0.41	5.28e-95	STRG0A80TKO.XP_040176343.1,STRG0A80TKO.XP_040176520.1,STRG0A80TKO.XP_040176540.1,STRG0A80TKO.XP_040176558.1,STRG0A80TKO.XP_040176722.1,STRG0A80TKO.XP_040176729.1,STRG0A80TKO.XP_040176748.1,STRG0A80TKO.XP_040176815.1,STRG0A80TKO.XP_040176905.1,STRG0A80TKO.XP_040176959.1,STRG0A80TKO.XP_040177443.1,STRG0A80TKO.XP_040178123.1,STRG0A80TKO.XP_040178148.1,STRG0A80TKO.XP_040178555.1,STRG0A80TKO.XP_040178…
GO:0070013	Intracellular organelle lumen	422	6374	0.55	8.05e-134	STRG0A80TKO.XP_040176343.1,STRG0A80TKO.XP_040176449.1,STRG0A80TKO.XP_040176520.1,STRG0A80TKO.XP_040176540.1,STRG0A80TKO.XP_040176558.1,STRG0A80TKO.XP_040176596.1,STRG0A80TKO.XP_040176722.1,STRG0A80TKO.XP_040176748.1,STRG0A80TKO.XP_040176757.1,STRG0A80TKO.XP_040176815.1,STRG0A80TKO.XP_040176830.1,STRG0A80TKO.XP_040176959.1,STRG0A80TKO.XP_040178123.1,STRG0A80TKO.XP_040178555.1,STRG0A80TKO.XP_040178…
GO:0031981	Nuclear lumen	415	5724	0.59	4.95e-144	STRG0A80TKO.XP_040176343.1,STRG0A80TKO.XP_040176449.1,STRG0A80TKO.XP_040176520.1,STRG0A80TKO.XP_040176540.1,STRG0A80TKO.XP_040176558.1,STRG0A80TKO.XP_040176596.1,STRG0A80TKO.XP_040176722.1,STRG0A80TKO.XP_040176748.1,STRG0A80TKO.XP_040176757.1,STRG0A80TKO.XP_040176815.1,STRG0A80TKO.XP_040176830.1,STRG0A80TKO.XP_040176959.1,STRG0A80TKO.XP_040178123.1,STRG0A80TKO.XP_040178555.1,STRG0A80TKO.XP_040178…
GO:0043232	Intracellular non-membrane-bounded organelle	372	7929	0.4	8.64e-71	STRG0A80TKO.XP_040176343.1,STRG0A80TKO.XP_040176449.1,STRG0A80TKO.XP_040176520.1,STRG0A80TKO.XP_040176722.1,STRG0A80TKO.XP_040176748.1,STRG0A80TKO.XP_040176815.1,STRG0A80TKO.XP_040176830.1,STRG0A80TKO.XP_040176905.1,STRG0A80TKO.XP_040176914.1,STRG0A80TKO.XP_040176959.1,STRG0A80TKO.XP_040178123.1,STRG0A80TKO.XP_040178148.1,STRG0A80TKO.XP_040178555.1,STRG0A80TKO.XP_040178726.1,STRG0A80TKO.XP_040178…
GO:0005654	Nucleoplasm	331	5035	0.55	1.91e-96	STRG0A80TKO.XP_040176343.1,STRG0A80TKO.XP_040176449.1,STRG0A80TKO.XP_040176520.1,STRG0A80TKO.XP_040176558.1,STRG0A80TKO.XP_040176596.1,STRG0A80TKO.XP_040176722.1,STRG0A80TKO.XP_040176757.1,STRG0A80TKO.XP_040176815.1,STRG0A80TKO.XP_040176830.1,STRG0A80TKO.XP_040178123.1,STRG0A80TKO.XP_040178555.1,STRG0A80TKO.XP_040178651.1,STRG0A80TKO.XP_040178726.1,STRG0A80TKO.XP_040178861.1,STRG0A80TKO.XP_040178…
GO:0140513	Nuclear protein-containing complex	226	2138	0.76	2.01e-97	STRG0A80TKO.XP_040176343.1,STRG0A80TKO.XP_040176520.1,STRG0A80TKO.XP_040176540.1,STRG0A80TKO.XP_040176558.1,STRG0A80TKO.XP_040176722.1,STRG0A80TKO.XP_040176815.1,STRG0A80TKO.XP_040178123.1,STRG0A80TKO.XP_040178555.1,STRG0A80TKO.XP_040178651.1,STRG0A80TKO.XP_040178726.1,STRG0A80TKO.XP_040178880.1,STRG0A80TKO.XP_040179192.1,STRG0A80TKO.XP_040179415.1,STRG0A80TKO.XP_040179475.1,STRG0A80TKO.XP_040179…
GO:0005829	Cytosol	193	5879	0.25	5.22e-14	STRG0A80TKO.XP_040176449.1,STRG0A80TKO.XP_040176596.1,STRG0A80TKO.XP_040176748.1,STRG0A80TKO.XP_040176793.1,STRG0A80TKO.XP_040177443.1,STRG0A80TKO.XP_040178757.1,STRG0A80TKO.XP_040178861.1,STRG0A80TKO.XP_040178912.1,STRG0A80TKO.XP_040179030.1,STRG0A80TKO.XP_040179092.1,STRG0A80TKO.XP_040179206.1,STRG0A80TKO.XP_040179531.1,STRG0A80TKO.XP_040179536.1,STRG0A80TKO.XP_040179796.1,STRG0A80TKO.XP_040179…
GO:1990904	Ribonucleoprotein complex	182	1113	0.95	6.38e-105	STRG0A80TKO.XP_040176343.1,STRG0A80TKO.XP_040176558.1,STRG0A80TKO.XP_040176722.1,STRG0A80TKO.XP_040176748.1,STRG0A80TKO.XP_040176959.1,STRG0A80TKO.XP_040178651.1,STRG0A80TKO.XP_040178726.1,STRG0A80TKO.XP_040178757.1,STRG0A80TKO.XP_040179192.1,STRG0A80TKO.XP_040179415.1,STRG0A80TKO.XP_040179536.1,STRG0A80TKO.XP_040179690.1,STRG0A80TKO.XP_040179694.1,STRG0A80TKO.XP_040179885.1,STRG0A80TKO.XP_040179…
GO:1902494	Catalytic complex	173	2543	0.56	7.41e-47	STRG0A80TKO.XP_040176343.1,STRG0A80TKO.XP_040176520.1,STRG0A80TKO.XP_040176540.1,STRG0A80TKO.XP_040176722.1,STRG0A80TKO.XP_040178555.1,STRG0A80TKO.XP_040178726.1,STRG0A80TKO.XP_040178880.1,STRG0A80TKO.XP_040179192.1,STRG0A80TKO.XP_040179415.1,STRG0A80TKO.XP_040179475.1,STRG0A80TKO.XP_040179534.1,STRG0A80TKO.XP_040179881.1,STRG0A80TKO.XP_040179885.1,STRG0A80TKO.XP_040179941.1,STRG0A80TKO.XP_040180…
GO:0005694	Chromosome	169	1877	0.69	1.99e-61	STRG0A80TKO.XP_040176449.1,STRG0A80TKO.XP_040176520.1,STRG0A80TKO.XP_040176722.1,STRG0A80TKO.XP_040176815.1,STRG0A80TKO.XP_040176830.1,STRG0A80TKO.XP_040176905.1,STRG0A80TKO.XP_040178148.1,STRG0A80TKO.XP_040178555.1,STRG0A80TKO.XP_040179406.1,STRG0A80TKO.XP_040179745.1,STRG0A80TKO.XP_040180247.1,STRG0A80TKO.XP_040180654.1,STRG0A80TKO.XP_040180665.1,STRG0A80TKO.XP_040181278.1,STRG0A80TKO.XP_040181…
GO:0140535	Intracellular protein-containing complex	105	1262	0.65	4.33e-34	STRG0A80TKO.XP_040176540.1,STRG0A80TKO.XP_040179534.1,STRG0A80TKO.XP_040179881.1,STRG0A80TKO.XP_040179941.1,STRG0A80TKO.XP_040180247.1,STRG0A80TKO.XP_040180466.1,STRG0A80TKO.XP_040180799.1,STRG0A80TKO.XP_040181670.1,STRG0A80TKO.XP_040183093.1,STRG0A80TKO.XP_040183347.1,STRG0A80TKO.XP_040183499.1,STRG0A80TKO.XP_040183928.1,STRG0A80TKO.XP_040184171.1,STRG0A80TKO.XP_040184331.1,STRG0A80TKO.XP_040184…
GO:0032993	protein-DNA complex	30	296	0.74	1.34e-11	STRG0A80TKO.XP_040176722.1,STRG0A80TKO.XP_040176905.1,STRG0A80TKO.XP_040178123.1,STRG0A80TKO.XP_040178148.1,STRG0A80TKO.XP_040181670.1,STRG0A80TKO.XP_040183499.1,STRG0A80TKO.XP_040184574.1,STRG0A80TKO.XP_040190437.1,STRG0A80TKO.XP_040190586.1,STRG0A80TKO.XP_040194138.1,STRG0A80TKO.XP_040194306.1,STRG0A80TKO.XP_040194624.1,STRG0A80TKO.XP_040195724.1,STRG0A80TKO.XP_040196918.1,STRG0A80TKO.XP_040201…
GO:0044815	DNA packaging complex	15	323	0.4	0.0139	STRG0A80TKO.XP_040176905.1,STRG0A80TKO.XP_040178148.1,STRG0A80TKO.XP_040181670.1,STRG0A80TKO.XP_040184579.1,STRG0A80TKO.XP_040186305.1,STRG0A80TKO.XP_040190586.1,STRG0A80TKO.XP_040193939.1,STRG0A80TKO.XP_040194624.1,STRG0A80TKO.XP_040196208.1,STRG0A80TKO.XP_040202396.1,STRG0A80TKO.XP_040205357.1,STRG0A80TKO.XP_040211266.1,STRG0A80TKO.XP_040214792.1,STRG0A80TKO.XP_040214904.1,STRG0A80TKO.XP_040217…
GO:0016234	Inclusion body	6	84	0.59	0.0468	STRG0A80TKO.XP_040183499.1,STRG0A80TKO.XP_040190311.1,STRG0A80TKO.XP_040201588.1,STRG0A80TKO.XP_040206615.1,STRG0A80TKO.XP_040209700.1,STRG0A80TKO.XP_040210535.1

## Sheet: Protein groups
Representative	Accession	1.1	1.2	1.3	1.4	1.5	1.6
XP_040176449.1		0	1	1	5	2	1
	XP_040176450.1	0	1	1	5	2	1
XP_040176520.1		2	5	4	4	3	2
	XP_040176515.1	2	5	4	4	3	2
	XP_040176528.1	2	5	4	4	3	2
	XP_040176538.1	2	5	4	4	3	2
	XP_040176548.1	2	5	4	4	3	2
	XP_040188733.1	1	0	0	0	0	0
	XP_040188735.1	1	0	0	0	0	0
	XP_040188736.1	1	0	0	0	0	0
	XP_040188737.1	1	0	0	0	0	0
XP_040176596.1		16	18	9	3	4	6
	XP_040176597.1	16	18	9	3	4	6
	XP_040176598.1	16	18	9	3	4	6
XP_040176729.1		0	0	0	1	1	1
	XP_040176726.1	0	0	0	1	1	1
	XP_040176727.1	0	0	0	1	1	1
	XP_040176728.1	0	0	0	1	1	1
XP_040176757.1		0	2	4	1	1	1
	XP_040176747.1	0	2	4	1	1	1
XP_040176793.1		14	10	10	6	6	5
	XP_040176792.1	13	9	9	6	6	5
	XP_040176795.1	0	11	9	4	4	3
	XP_040176796.1	9	12	10	5	4	3
	XP_040176797.1	9	9	9	5	4	2
XP_040176815.1		13	28	21	14	13	11
	XP_040176816.1	13	28	21	14	13	11
XP_040176905.1		12	21	22	15	18	18
	XP_040176858.1	0	0	0	7	8	0
	XP_040176859.1	0	0	0	7	8	0
	XP_040176860.1	0	0	0	7	8	0
	XP_040176861.1	12	21	22	15	18	18
	XP_040176864.1	0	0	0	7	8	0
	XP_040176875.1	0	0	0	7	8	0
	XP_040176876.1	0	0	0	7	8	0
	XP_040176877.1	0	0	0	7	8	0
	XP_040176893.1	0	0	0	7	8	0
	XP_040176894.1	0	0	0	7	8	0
	XP_040176895.1	12	21	22	15	18	18
	XP_040176904.1	0	0	0	7	8	0
	XP_040178146.1	0	0	0	7	8	0
	XP_040190588.1	0	0	0	7	8	0
	XP_040190590.1	7	12	13	8	10	10
XP_040177443.1		21	13	6	3	0	1
	XP_040177440.1	16	13	8	3	2	1
	XP_040177441.1	16	13	8	3	2	1
	XP_040177442.1	8	8	4	2	0	1
XP_040178148.1		13	19	19	12	14	13
	XP_040176853.1	9	13	11	10	10	9
	XP_040176854.1	9	13	11	10	10	9
	XP_040176855.1	9	13	11	10	10	9
	XP_040176857.1	9	13	11	10	10	9
	XP_040176863.1	9	13	11	10	10	9
	XP_040176872.1	9	13	11	10	10	9
	XP_040176873.1	9	13	11	10	10	9
	XP_040176874.1	9	13	11	10	10	9
	XP_040176888.1	9	13	11	10	10	9
	XP_040176889.1	9	13	11	10	10	9
	XP_040176891.1	9	13	11	10	10	9
	XP_040176892.1	9	13	11	10	10	9
	XP_040176900.1	9	13	11	10	10	9
	XP_040176902.1	9	13	11	10	10	9
	XP_040176903.1	9	13	11	10	10	9
	XP_040186056.1	2	0	0	0	0	0
	XP_040190587.1	9	13	11	10	10	9
XP_040178348.1		0	40	0	0	0	0
	XP_040177284.1	0	3	2	0	0	0
	XP_040177285.1	0	0	6	1	0	0
	XP_040177353.1	0	3	1	0	0	0
	XP_040177366.1	0	3	0	0	0	0
	XP_040177375.1	1	0	0	2	1	5
	XP_040177376.1	0	1	0	0	0	0
	XP_040177395.1	1	0	0	4	1	5
	XP_040177402.1	1	0	0	4	1	5
	XP_040177477.1	1	0	0	1	1	5
	XP_040177834.1	0	0	0	1	1	0
	XP_040178283.1	0	0	0	16	1	0
	XP_040178284.1	1	0	0	3	1	5
	XP_040178323.1	1	0	12	10	1	5
	XP_040178324.1	1	0	0	2	1	5
	XP_040178334.1	1	0	0	1	1	5
	XP_040178336.1	1	28	0	10	1	5
	XP_040178349.1	1	0	0	2	1	5
	XP_040178351.1	1	8	0	2	1	5
	XP_040195214.1	0	27	0	0	0	0
	XP_040203317.1	1	0	0	4	1	5
	XP_040203321.1	0	15	0	0	0	0
	XP_040203325.1	0	37	0	0	0	0
	XP_040203326.1	0	20	0	0	0	0
	XP_040203333.1	1	0	16	13	1	5
	XP_040203341.1	0	13	6	0	0	0
	XP_040203471.1	1	0	0	6	1	5
	XP_040203474.1	1	0	0	2	1	5
	XP_040203477.1	0	1	0	0	0	0
	XP_040203489.1	1	8	0	2	1	5
	XP_040203500.1	0	10	0	0	0	0
	XP_040203508.1	0	5	0	0	0	0
	XP_040203895.1	1	0	0	1	1	5
	XP_040210673.1	0	28	0	0	0	0
XP_040178457.1		1	1	1	1	1	1
	XP_040178458.1	1	1	1	1	1	1
XP_040178555.1		0	6	5	3	2	1
	XP_040178556.1	0	6	5	3	2	1
	XP_040178557.1	0	6	5	3	2	1
XP_040178726.1		0	3	6	2	2	2
	XP_040178727.1	0	2	5	2	2	2
XP_040178861.1		9	20	11	2	1	2
	XP_040178862.1	9	20	9	2	1	2
	XP_040178863.1	9	20	11	2	1	2
	XP_040178864.1	9	20	11	2	1	2
	XP_040178865.1	9	20	11	2	1	2
	XP_040178866.1	9	20	11	2	1	2
	XP_040178867.1	9	20	11	2	1	2
	XP_040178868.1	9	20	11	2	1	2
	XP_040178869.1	9	20	11	2	1	2
	XP_040178870.1	8	20	11	2	1	2
	XP_040178871.1	9	20	11	2	1	2
XP_040178880.1		2	9	7	5	4	1
	XP_040178881.1	2	9	7	5	4	1
	XP_040178882.1	2	9	7	5	4	1
	XP_040178883.1	2	9	7	5	4	1
	XP_040178884.1	2	9	7	5	4	1
	XP_040178885.1	2	9	7	5	4	1
	XP_040178886.1	2	9	7	5	4	1
XP_040179030.1		7	15	5	9	5	12
	XP_040179032.1	7	15	5	9	5	12
	XP_040179033.1	7	15	5	9	5	12
	XP_040179034.1	7	15	5	9	5	12
XP_040179406.1		1	6	11	36	38	28
	XP_040179407.1	1	6	11	36	38	28
	XP_040179408.1	1	6	10	28	30	22
XP_040179433.1		2	2	1	0	0	0
	XP_040179431.1	2	2	1	0	0	0
	XP_040179432.1	2	2	1	0	0	0
XP_040179452.1		4	4	2	2	2	1
	XP_040179453.1	4	4	2	2	2	1
	XP_040179455.1	4	4	2	2	2	1
XP_040179475.1		17	18	9	5	5	5
	XP_040179476.1	0	0	0	4	4	4
XP_040179690.1		13	11	11	9	10	8
	XP_040177459.1	0	0	11	9	10	8
	XP_040179698.1	13	11	11	9	10	8
	XP_040179705.1	12	0	0	0	0	0
	XP_040179719.1	8	4	4	3	2	3
	XP_040179727.1	8	0	0	3	2	3
XP_040179694.1		3	4	3	2	1	0
	XP_040179695.1	3	4	3	2	1	0
XP_040179745.1		6	5	2	3	2	3
	XP_040179744.1	6	5	2	3	2	3
XP_040179932.1		2	4	4	4	5	4
	XP_040179939.1	0	2	5	3	4	1
XP_040179941.1		2	2	4	0	2	0
	XP_040178533.1	0	0	3	0	0	0
XP_040180092.1		0	0	1	0	1	1
	XP_040180089.1	0	0	1	0	1	1
	XP_040180090.1	0	0	1	0	1	1
	XP_040180091.1	0	0	1	0	1	1
XP_040180187.1		16	20	15	20	17	20
	XP_040180188.1	16	20	15	20	17	20
	XP_040180189.1	16	20	15	20	17	20
	XP_040180190.1	16	20	15	20	17	20
	XP_040180191.1	16	20	15	20	17	20
	XP_040180192.1	16	20	15	20	17	20
XP_040180237.1		0	2	1	4	4	3
	XP_040180238.1	0	2	1	4	4	3
XP_040180356.1		0	2	4	0	2	1
	XP_040180357.1	0	2	4	0	2	1
XP_040180482.1		0	1	0	1	2	0
	XP_040180478.1	0	1	0	1	2	0
	XP_040180480.1	0	1	0	1	2	0
	XP_040180481.1	0	1	0	1	2	0
XP_040180665.1		14	8	5	4	4	3
	XP_040180666.1	14	8	5	4	4	3
XP_040180887.1		0	2	4	3	8	10
	XP_040180888.1	0	2	4	3	8	10
XP_040181078.1		1	6	7	4	3	2
	XP_040181083.1	1	6	7	4	3	2
	XP_040181088.1	1	6	7	4	3	2
	XP_040181097.1	1	6	7	4	3	2
	XP_040181135.1	3	6	6	5	3	5
	XP_040181148.1	3	6	6	5	3	5
XP_040181187.1		0	1	0	5	5	3
	XP_040181190.1	0	1	0	5	5	3
	XP_040181194.1	0	1	0	5	4	3
	XP_040181201.1	0	1	0	5	5	3
XP_040181278.1		0	4	1	5	19	12
	XP_040181279.1	0	4	1	5	19	12
XP_040181503.1		12	26	16	26	21	21
	XP_040181500.1	12	26	16	26	21	21
	XP_040181501.1	12	26	16	26	21	21
	XP_040181502.1	12	26	16	26	21	21
XP_040181557.1		1	2	2	3	4	2
	XP_040181558.1	1	2	2	3	4	2
	XP_040181559.1	1	2	2	3	4	2
	XP_040181560.1	1	2	2	3	4	2
XP_040181583.1		1	3	3	4	3	2
	XP_040191779.1	1	0	0	0	0	2
XP_040181644.1		1	2	1	2	3	3
	XP_040181634.1	1	2	1	2	3	3
XP_040181875.1		15	21	14	2	0	1
	XP_040181876.1	14	20	13	2	0	1
	XP_040202908.1	0	0	0	2	0	1
XP_040182071.1		2	2	0	3	2	0
	XP_040212876.1	2	2	0	3	2	0
	XP_040214560.1	0	2	0	3	2	0
XP_040182302.1		2	4	4	2	3	4
	XP_040182300.1	2	4	4	2	3	4
	XP_040182301.1	2	4	4	2	3	4
	XP_040182303.1	2	3	3	2	3	3
XP_040182364.1		0	3	1	8	7	4
	XP_040182363.1	0	3	1	8	7	4
XP_040182379.1		19	28	25	16	17	16
	XP_040182380.1	19	27	0	16	17	16
XP_040183452.1		7	4	5	1	0	1
	XP_040183453.1	7	5	5	1	0	1
XP_040183499.1		8	28	19	24	21	18
	XP_040183498.1	8	28	19	24	21	18
XP_040183506.1		1	0	0	1	2	0
	XP_040183507.1	1	0	0	1	2	0
	XP_040183508.1	1	0	0	1	2	0
	XP_040183509.1	1	0	0	1	2	0
XP_040183528.1		2	12	6	10	12	12
	XP_040183529.1	2	12	6	10	12	12
	XP_040183530.1	0	11	5	8	10	11
XP_040183560.1		7	7	8	6	8	5
	XP_040187419.1	7	7	8	6	8	5
XP_040183928.1		0	2	1	1	5	2
	XP_040183927.1	0	2	1	1	5	2
	XP_040183929.1	0	2	1	1	4	2
XP_040184033.1		0	0	0	3	1	1
	XP_040184032.1	0	0	0	3	1	1
XP_040184201.1		0	1	0	1	1	1
	XP_040184202.1	0	1	0	1	1	1
XP_040184203.1		0	2	3	3	2	1
	XP_040184204.1	0	2	3	3	2	1
XP_040184388.1		0	3	4	1	0	0
	XP_040184389.1	0	3	4	1	0	0
XP_040184547.1		0	1	2	1	0	0
	XP_040184546.1	0	1	2	1	0	0
	XP_040184548.1	0	1	2	1	0	0
XP_040184567.1		2	4	3	0	0	0
	XP_040181517.1	1	4	3	0	0	0
	XP_040184568.1	2	3	2	0	0	0
XP_040184574.1		3	3	1	4	2	2
	XP_040184573.1	3	3	1	4	2	2
XP_040184579.1		0	1	2	1	1	0
	XP_040184580.1	0	1	2	1	1	0
XP_040184655.1		0	0	0	7	7	6
	XP_040184657.1	0	0	0	7	7	6
	XP_040184658.1	0	0	0	7	7	6
	XP_040184659.1	0	0	0	7	7	6
XP_040184711.1		1	5	4	6	6	7
	XP_040184712.1	1	5	4	6	6	7
XP_040184723.1		1	5	2	0	1	1
	XP_040184721.1	1	5	2	0	1	1
	XP_040184722.1	1	5	2	0	1	1
	XP_040184724.1	1	5	2	0	1	1
	XP_040184725.1	1	5	2	0	1	1
	XP_040184726.1	1	5	2	0	1	1
	XP_040184727.1	1	5	2	0	1	1
XP_040184733.1		2	8	10	8	2	7
	XP_040184737.1	0	5	3	3	2	2
	XP_040184739.1	0	5	3	3	2	2
XP_040184833.1		0	0	0	2	1	1
	XP_040184834.1	0	0	0	2	1	1
XP_040185097.1		2	4	3	6	4	4
	XP_040206634.1	2	3	3	0	3	0
XP_040185160.1		0	4	1	8	7	6
	XP_040185159.1	0	4	1	8	7	6
	XP_040185161.1	0	4	1	8	7	6
	XP_040185162.1	0	4	1	8	7	6
XP_040185215.1		0	5	4	1	2	0
	XP_040185214.1	0	5	4	1	2	0
XP_040185255.1		3	9	5	8	6	4
	XP_040185252.1	3	9	5	8	6	4
	XP_040185253.1	3	9	5	8	6	4
	XP_040185254.1	3	9	5	8	6	4
XP_040185306.1		0	2	0	1	1	1
	XP_040185305.1	0	2	0	1	1	1
	XP_040185307.1	0	2	0	0	1	1
XP_040185381.1		0	3	1	1	0	0
	XP_040185611.1	0	0	1	1	0	0
	XP_040185624.1	0	0	1	1	0	0
XP_040185403.1		0	3	1	1	1	1
	XP_040185404.1	0	3	1	1	1	1
XP_040185476.1		0	1	1	1	0	1
	XP_040185477.1	0	1	1	1	0	1
XP_040185554.1		1	2	2	2	2	1
	XP_040209042.1	0	2	2	2	2	1
XP_040185573.1		0	1	1	28	23	14
	XP_040185575.1	0	1	1	28	23	14
	XP_040185576.1	0	1	1	0	22	13
XP_040185639.1		4	9	3	1	0	0
	XP_040185646.1	3	8	3	1	0	0
XP_040185737.1		2	4	1	2	1	1
	XP_040180809.1	2	4	1	2	1	1
XP_040185812.1		2	3	3	1	0	1
	XP_040185811.1	2	3	3	1	0	1
XP_040186016.1		1	3	6	1	1	1
	XP_040213349.1	3	5	1	1	1	1
	XP_040213350.1	3	4	1	1	1	1
XP_040186039.1		4	4	2	4	1	2
	XP_040186040.1	4	4	2	4	1	2
	XP_040186041.1	4	3	2	3	0	2
XP_040186130.1		0	6	5	7	6	4
	XP_040186131.1	0	6	5	7	6	4
	XP_040186132.1	0	6	5	7	6	4
	XP_040186133.1	0	6	4	7	6	4
XP_040186305.1		2	4	3	2	2	2
	XP_040186306.1	2	4	3	2	2	2
	XP_040186307.1	2	4	3	2	2	2
	XP_040186308.1	2	4	3	2	2	2
XP_040186364.1		0	0	0	5	5	5
	XP_040186365.1	0	0	0	5	5	5
XP_040186503.1		0	0	0	2	1	1
	XP_040186504.1	0	0	0	2	1	1
XP_040186550.1		0	3	1	1	1	1
	XP_040185101.1	0	0	1	1	1	1
	XP_040185555.1	0	0	1	1	1	1
	XP_040185556.1	0	0	1	1	1	1
	XP_040185557.1	0	0	1	1	1	1
	XP_040186551.1	0	2	1	1	1	1
	XP_040199557.1	0	0	1	1	1	1
	XP_040208971.1	0	0	1	1	1	1
	XP_040210516.1	0	0	1	1	1	1
	XP_040214968.1	0	0	1	1	1	1
	XP_040214969.1	0	0	1	1	1	1
XP_040186559.1		0	0	2	3	1	1
	XP_040186555.1	0	0	2	3	1	1
	XP_040186556.1	0	0	2	3	1	1
	XP_040186557.1	0	0	2	3	1	1
	XP_040186558.1	0	0	2	3	1	1
	XP_040186560.1	0	0	2	3	1	1
	XP_040186561.1	0	0	2	3	1	1
	XP_040186562.1	0	0	2	3	1	1
	XP_040186563.1	0	0	2	3	1	1
XP_040186630.1		1	7	7	7	7	5
	XP_040186627.1	1	7	7	7	7	5
	XP_040186628.1	1	7	7	7	7	5
	XP_040186629.1	1	7	7	7	7	5
XP_040186801.1		11	10	6	8	5	10
	XP_040186800.1	11	10	6	8	5	10
XP_040186827.1		1	1	0	0	0	1
	XP_040186828.1	1	1	0	0	0	1
XP_040186867.1		0	0	0	2	2	2
	XP_040186868.1	0	0	0	2	2	2
	XP_040186869.1	0	0	0	2	2	2
	XP_040186870.1	0	0	0	2	2	2
XP_040186885.1		0	0	0	8	8	4
	XP_040186884.1	0	0	0	8	8	4
XP_040186943.1		0	35	34	20	36	22
	XP_040186944.1	0	35	34	20	36	22
XP_040186951.1		0	2	2	2	1	1
	XP_040186949.1	0	2	2	2	1	1
	XP_040186950.1	0	2	2	2	1	1
	XP_040186952.1	0	2	2	2	1	1
XP_040187071.1		0	1	1	1	0	1
	XP_040187070.1	0	1	1	1	0	1
	XP_040187072.1	0	1	1	1	0	1
	XP_040212854.1	0	1	1	1	0	1
XP_040187092.1		4	1	0	1	1	1
	XP_040187093.1	3	1	0	1	1	1
XP_040187201.1		2	3	2	1	0	0
	XP_040187202.1	2	3	2	1	0	0
XP_040187243.1		1	6	6	13	10	14
	XP_040187244.1	1	6	6	13	10	14
	XP_040187245.1	1	6	6	13	10	14
XP_040187287.1		3	6	5	0	0	0
	XP_040187288.1	3	6	5	0	0	0
XP_040187291.1		0	0	1	0	2	1
	XP_040187290.1	0	0	1	0	2	1
XP_040187355.1		5	9	7	5	4	1
	XP_040187354.1	5	9	7	5	4	1
	XP_040187356.1	5	9	7	5	4	1
	XP_040187357.1	5	9	7	5	4	1
	XP_040187358.1	5	9	7	5	4	1
XP_040187364.1		1	9	4	4	4	2
	XP_040187363.1	1	9	4	4	4	2
XP_040187425.1		2	0	0	1	0	3
	XP_040187422.1	2	0	0	1	0	3
	XP_040187423.1	2	0	0	1	0	3
	XP_040187424.1	2	0	0	1	0	3
	XP_040187426.1	2	0	0	1	0	3
XP_040187566.1		0	0	1	1	2	2
	XP_040187567.1	0	0	1	1	2	2
	XP_040187568.1	0	0	1	1	2	2
	XP_040187569.1	0	0	1	1	2	2
	XP_040187570.1	0	0	1	1	2	2
	XP_040197011.1	0	0	0	0	0	1
	XP_040217939.1	0	0	0	0	1	2
XP_040187602.1		0	0	0	3	2	3
	XP_040187603.1	0	0	0	3	2	3
XP_040187638.1		0	2	4	1	0	1
	XP_040206722.1	0	1	0	1	0	1
XP_040187755.1		1	1	1	3	5	1
	XP_040187756.1	1	1	1	3	5	1
	XP_040187757.1	1	1	1	3	5	1
XP_040187856.1		3	5	5	5	6	4
	XP_040187852.1	3	5	5	5	6	4
	XP_040187853.1	3	5	5	5	6	4
	XP_040187854.1	3	5	5	5	6	4
	XP_040187855.1	3	5	5	5	6	4
	XP_040187857.1	3	5	5	5	6	4
XP_040187883.1		4	2	1	2	1	0
	XP_040187880.1	4	2	1	2	1	0
	XP_040187882.1	4	2	1	2	1	0
XP_040187892.1		0	2	2	5	6	7
	XP_040187896.1	0	2	2	5	6	7
XP_040187905.1		1	7	6	19	13	11
	XP_040187904.1	1	7	6	19	13	11
	XP_040187906.1	1	7	6	19	14	12
XP_040188116.1		5	3	3	2	0	0
	XP_040211507.1	2	0	0	1	0	0
	XP_040211514.1	2	0	0	1	0	0
	XP_040211520.1	2	0	0	1	0	0
	XP_040211527.1	2	0	0	1	0	0
XP_040188196.1		9	8	6	5	7	3
	XP_040188197.1	9	8	6	5	7	3
XP_040188240.1		45	79	60	52	45	47
	XP_040188239.1	45	79	60	52	45	47
	XP_040188241.1	45	79	60	52	45	47
	XP_040188242.1	45	79	60	52	45	47
	XP_040188244.1	45	79	60	52	45	47
	XP_040188245.1	45	78	59	51	44	47
	XP_040188246.1	45	79	60	52	45	47
XP_040188340.1		2	3	3	4	3	5
	XP_040188341.1	2	3	3	4	3	5
	XP_040188342.1	2	3	3	4	3	5
XP_040188375.1		0	1	0	2	1	1
	XP_040188376.1	0	1	0	2	1	1
XP_040188525.1		0	2	1	1	0	2
	XP_040188526.1	0	2	1	1	0	2
	XP_040188527.1	0	2	1	1	0	2
XP_040188705.1		3	2	2	2	0	0
	XP_040188706.1	3	2	2	2	0	0
	XP_040188707.1	3	2	2	2	0	0
XP_040188724.1		0	0	0	2	5	2
	XP_040188725.1	0	0	0	2	5	2
XP_040189116.1		0	1	1	10	9	11
	XP_040189117.1	0	1	1	10	9	11
	XP_040189118.1	0	1	1	10	9	11
	XP_040189119.1	0	1	1	10	9	11
XP_040189140.1		3	2	1	2	4	3
	XP_040189132.1	0	1	1	0	0	0
	XP_040189148.1	0	1	1	0	0	0
XP_040189160.1		6	5	4	4	1	2
	XP_040186431.1	0	3	2	0	0	0
	XP_040189161.1	6	5	4	4	1	2
XP_040189567.1		2	14	11	16	10	10
	XP_040189566.1	2	14	11	16	10	10
XP_040189789.1		4	6	6	3	0	3
	XP_040180789.1	4	5	5	3	0	3
XP_040189796.1		1	6	4	1	3	1
	XP_040189797.1	1	6	4	1	3	1
XP_040189870.1		1	0	1	1	0	0
	XP_040189871.1	1	0	1	1	0	0
	XP_040189872.1	1	0	1	1	0	0
XP_040189977.1		0	1	2	1	0	0
	XP_040189971.1	0	1	2	1	0	0
	XP_040189984.1	0	1	2	1	0	0
	XP_040189990.1	0	1	2	1	0	0
	XP_040189996.1	0	1	2	1	0	0
	XP_040190002.1	0	1	2	1	0	0
XP_040190033.1		0	1	3	3	4	5
	XP_040190034.1	0	1	3	3	4	5
	XP_040190035.1	0	1	3	3	4	5
	XP_040190036.1	0	1	3	3	4	5
XP_040190114.1		0	2	4	2	2	0
	XP_040190115.1	0	2	4	2	2	0
	XP_040190116.1	0	2	4	2	2	0
	XP_040190117.1	0	2	4	2	2	0
XP_040190311.1		0	40	32	43	32	27
	XP_040190312.1	0	39	31	43	32	27
XP_040190442.1		2	15	11	20	0	0
	XP_040190443.1	2	15	11	20	0	0
XP_040190556.1		2	1	1	0	0	0
	XP_040190549.1	2	1	1	0	0	0
	XP_040190550.1	2	1	1	0	0	0
	XP_040190551.1	2	1	1	0	0	0
	XP_040190552.1	2	1	1	0	0	0
	XP_040190553.1	2	1	1	0	0	0
	XP_040190554.1	2	1	1	0	0	0
	XP_040190555.1	2	1	1	0	0	0
XP_040190586.1		4	3	3	2	2	2
	XP_040176850.1	4	3	3	2	2	2
	XP_040176851.1	4	3	3	2	2	2
	XP_040176852.1	4	3	3	2	2	2
	XP_040176862.1	4	3	3	2	2	2
	XP_040176868.1	4	3	3	2	2	2
	XP_040176869.1	4	3	3	2	2	2
	XP_040176870.1	4	3	3	2	2	2
	XP_040176884.1	4	3	3	2	2	2
	XP_040176885.1	4	3	3	2	2	2
	XP_040176886.1	4	3	3	2	2	2
	XP_040176887.1	4	3	3	2	2	2
	XP_040176897.1	4	3	3	2	2	2
	XP_040176898.1	4	3	3	2	2	2
	XP_040176899.1	4	3	3	2	2	2
	XP_040181433.1	0	2	2	1	1	1
	XP_040184495.1	0	1	1	1	1	1
	XP_040201891.1	0	1	1	1	1	1
XP_040190753.1		0	4	4	1	1	1
	XP_040190301.1	0	4	4	1	1	1
XP_040190788.1		0	0	3	1	2	3
	XP_040190789.1	0	0	3	1	2	3
XP_040190803.1		0	1	0	4	3	2
	XP_040176920.1	1	0	0	3	3	2
	XP_040176921.1	1	0	0	3	3	2
	XP_040190804.1	0	1	0	4	3	2
	XP_040190805.1	0	1	0	4	3	2
XP_040191014.1		0	5	5	3	6	5
	XP_040191019.1	0	5	5	3	6	5
	XP_040191022.1	0	5	5	3	6	5
	XP_040191023.1	0	5	5	3	6	5
	XP_040191027.1	0	5	5	3	6	5
	XP_040196360.1	0	3	0	0	0	0
	XP_040196361.1	0	3	0	0	0	0
XP_040191055.1		0	1	0	3	2	2
	XP_040191054.1	0	1	0	3	2	2
XP_040191057.1		2	19	21	29	20	20
	XP_040191058.1	2	0	20	0	19	20
XP_040191117.1		4	12	13	14	12	9
	XP_040179382.1	2	0	0	3	1	1
	XP_040179383.1	2	0	0	3	1	1
	XP_040186014.1	0	0	0	2	0	0
	XP_040186015.1	0	0	0	2	0	0
	XP_040191118.1	4	12	13	14	12	9
XP_040191353.1		0	7	4	1	0	0
	XP_040191352.1	0	7	4	1	0	0
XP_040191369.1		0	22	9	7	4	6
	XP_040191370.1	0	22	9	7	4	6
	XP_040191371.1	0	22	9	7	4	6
	XP_040191372.1	0	0	8	6	4	0
XP_040191466.1		0	2	5	1	2	0
	XP_040191465.1	0	2	5	1	2	0
	XP_040191467.1	0	2	5	1	2	0
XP_040191476.1		0	7	4	2	0	0
	XP_040191477.1	0	7	4	2	0	0
	XP_040191478.1	0	7	4	2	0	0
	XP_040191479.1	0	7	4	2	0	0
	XP_040191480.1	0	7	4	2	0	0
XP_040192182.1		0	2	2	2	2	1
	XP_040192180.1	0	2	2	2	2	1
	XP_040192181.1	0	2	2	2	2	1
XP_040192372.1		0	5	5	3	2	4
	XP_040207927.1	0	4	4	3	2	4
XP_040192383.1		0	3	3	3	2	1
	XP_040206643.1	0	3	0	2	0	0
XP_040192639.1		1	1	1	1	2	2
	XP_040192640.1	1	1	1	1	2	2
XP_040192781.1		5	0	3	3	8	3
	XP_040192780.1	5	6	3	3	7	2
XP_040192808.1		15	20	15	11	8	7
	XP_040192957.1	6	11	8	7	0	4
	XP_040192958.1	6	11	8	7	0	4
XP_040192882.1		0	1	1	5	2	2
	XP_040192881.1	0	1	1	5	2	2
XP_040192909.1		0	0	0	1	1	2
	XP_040187769.1	0	0	0	0	0	1
	XP_040205890.1	0	0	0	0	0	1
XP_040192985.1		0	1	0	2	1	1
	XP_040176411.1	0	1	0	2	1	1
	XP_040192986.1	0	1	0	2	1	1
XP_040193079.1		0	3	2	2	1	2
	XP_040193080.1	0	3	2	2	1	2
	XP_040193081.1	0	3	2	2	1	2
	XP_040193082.1	0	3	2	2	1	2
	XP_040193083.1	0	3	2	2	1	2
	XP_040193084.1	0	3	2	2	1	2
	XP_040193085.1	0	3	2	2	1	2
	XP_040193086.1	0	0	1	0	1	2
	XP_040193087.1	0	0	1	0	1	2
	XP_040193088.1	0	0	1	0	1	2
XP_040193235.1		2	6	7	1	1	2
	XP_040193236.1	2	6	7	1	1	2
	XP_040193237.1	2	0	0	1	1	0
	XP_040193238.1	2	0	0	1	1	0
XP_040193305.1		2	2	1	3	0	0
	XP_040186648.1	0	0	0	3	0	0
	XP_040193306.1	2	2	1	3	0	0
	XP_040209288.1	1	0	1	0	0	0
XP_040193645.1		2	2	1	0	0	0
	XP_040193646.1	2	2	1	0	0	0
	XP_040193647.1	2	2	1	0	0	0
XP_040193735.1		0	0	0	2	4	1
	XP_040193734.1	0	0	0	2	4	1
XP_040193736.1		0	0	1	1	1	1
	XP_040188456.1	0	0	1	1	1	1
XP_040193773.1		0	2	1	2	1	1
	XP_040193774.1	0	2	1	2	1	1
XP_040193939.1		1	0	2	2	0	0
	XP_040193940.1	1	0	2	2	0	0
XP_040193950.1		21	7	6	3	2	2
	XP_040193941.1	21	7	6	3	2	2
XP_040193969.1		0	0	1	2	1	0
	XP_040193970.1	0	0	1	2	1	0
XP_040194030.1		0	1	0	2	1	1
	XP_040212006.1	0	1	0	0	0	0
XP_040194036.1		0	0	1	1	2	2
	XP_040194037.1	0	0	1	1	2	2
	XP_040194038.1	0	0	1	1	2	2
	XP_040194039.1	0	0	1	1	2	2
	XP_040194040.1	0	0	1	1	2	2
XP_040194138.1		1	7	5	6	6	6
	XP_040194139.1	1	7	5	6	6	6
XP_040194262.1		2	12	5	6	5	4
	XP_040194264.1	2	12	5	6	5	4
XP_040194334.1		4	2	2	1	0	0
	XP_040186603.1	2	0	0	1	0	0
	XP_040192795.1	0	0	0	1	0	0
	XP_040192796.1	0	0	0	1	0	0
	XP_040194335.1	4	2	2	1	0	0
	XP_040204554.1	3	2	2	1	0	0
	XP_040204555.1	3	2	2	1	0	0
	XP_040205592.1	0	0	0	1	0	0
	XP_040210727.1	3	3	4	1	0	0
XP_040194459.1		0	3	1	4	6	3
	XP_040194451.1	0	3	1	4	6	3
XP_040194464.1		0	0	0	1	1	1
	XP_040194463.1	0	0	0	1	1	1
XP_040194504.1		2	4	3	6	2	2
	XP_040194505.1	2	0	1	4	0	0
XP_040194559.1		44	11	11	22	22	22
	XP_040178795.1	4	1	1	2	2	2
	XP_040194561.1	40	10	10	20	20	20
	XP_040194565.1	0	9	9	18	18	18
	XP_040203032.1	4	1	1	2	2	2
	XP_040203297.1	36	9	9	18	18	18
	XP_040207596.1	4	1	1	2	2	2
	XP_040207829.1	4	1	1	2	2	2
XP_040194610.1		0	1	1	16	10	7
	XP_040194609.1	0	1	1	16	10	7
XP_040194624.1		2	3	2	2	2	2
	XP_040194627.1	0	3	2	1	0	2
XP_040194805.1		0	20	25	13	22	5
	XP_040194806.1	0	20	25	13	22	5
XP_040194853.1		0	2	1	0	0	1
	XP_040194854.1	0	2	1	0	0	1
	XP_040194855.1	0	2	1	0	0	1
	XP_040194856.1	0	2	1	0	0	1
	XP_040194857.1	0	2	1	0	0	1
	XP_040194858.1	0	2	1	0	0	1
	XP_040194859.1	0	2	1	0	0	1
	XP_040194860.1	0	2	1	0	0	1
	XP_040194861.1	0	2	1	0	0	1
	XP_040194862.1	0	2	1	0	0	1
	XP_040194863.1	0	2	1	0	0	1
	XP_040194865.1	0	2	1	0	0	1
XP_040194889.1		1	4	1	1	3	2
	XP_040194887.1	1	4	1	1	3	2
XP_040195067.1		5	7	3	0	1	1
	XP_040195069.1	6	3	2	1	0	0
	XP_040195074.1	1	0	0	0	0	0
XP_040195724.1		3	13	5	6	3	5
	XP_040195725.1	3	13	5	6	3	5
	XP_040195726.1	3	13	5	6	3	5
XP_040196230.1		2	10	11	3	1	0
	XP_040196231.1	2	10	11	3	1	0
	XP_040196232.1	2	10	11	3	1	0
XP_040196257.1		4	6	3	5	5	4
	XP_040196258.1	4	6	3	5	5	4
XP_040196263.1		0	0	0	2	2	1
	XP_040196265.1	0	0	0	1	1	1
XP_040196420.1		2	3	3	2	2	1
	XP_040186287.1	2	3	3	2	2	1
	XP_040196419.1	2	3	3	2	2	1
	XP_040202318.1	0	2	2	0	0	0
XP_040196455.1		2	1	1	1	3	1
	XP_040196462.1	1	1	1	1	2	1
XP_040196511.1		0	2	3	67	106	86
	XP_040196512.1	0	2	3	67	106	86
XP_040196533.1		0	0	0	1	1	1
	XP_040196541.1	0	0	0	1	1	1
XP_040196636.1		0	2	2	2	1	2
	XP_040196637.1	0	2	2	2	1	2
	XP_040196638.1	0	2	2	2	1	2
	XP_040196640.1	0	2	2	2	1	2
	XP_040196641.1	0	2	2	2	1	2
XP_040196676.1		2	4	4	5	0	4
	XP_040196677.1	2	0	0	3	0	4
XP_040196726.1		0	2	2	2	5	3
	XP_040196727.1	0	2	2	2	5	3
	XP_040196728.1	0	2	2	2	5	3
XP_040196981.1		3	5	2	4	3	3
	XP_040196980.1	3	5	2	4	3	3
XP_040197316.1		2	1	2	0	0	0
	XP_040197315.1	2	1	2	0	0	0
XP_040197490.1		0	1	0	1	5	2
	XP_040197484.1	0	1	0	1	5	2
	XP_040197486.1	0	1	0	1	5	2
XP_040198211.1		0	2	1	6	6	3
	XP_040198210.1	0	2	1	6	6	3
	XP_040198212.1	0	2	1	6	6	3
XP_040198500.1		1	4	2	8	17	12
	XP_040198499.1	1	4	2	8	17	12
	XP_040198501.1	1	4	2	8	17	12
XP_040198643.1		3	1	1	0	1	2
	XP_040187871.1	0	0	1	0	0	0
XP_040198913.1		0	0	0	7	6	6
	XP_040198911.1	0	0	0	7	6	6
	XP_040198912.1	0	0	0	7	6	6
	XP_040198914.1	0	0	0	7	6	6
	XP_040198915.1	0	0	0	7	6	6
	XP_040198916.1	0	0	0	7	6	6
	XP_040198917.1	0	0	0	7	6	6
XP_040199140.1		0	2	1	5	4	2
	XP_040199137.1	0	0	1	4	4	2
	XP_040199138.1	0	0	1	4	4	2
	XP_040199139.1	0	0	1	4	4	2
XP_040199347.1		0	1	0	0	1	1
	XP_040199348.1	0	1	0	0	1	1
XP_040199451.1		4	4	0	0	1	2
	XP_040199450.1	4	4	0	0	1	2
	XP_040199452.1	4	4	0	0	1	2
	XP_040199453.1	4	4	0	0	1	2
XP_040199835.1		0	2	2	1	1	2
	XP_040199836.1	0	2	2	1	1	2
	XP_040199837.1	0	2	2	1	1	2
	XP_040199839.1	0	2	2	1	1	2
XP_040200065.1		0	1	3	3	0	3
	XP_040200074.1	0	1	3	3	0	3
XP_040200374.1		1	10	6	1	0	0
	XP_040200373.1	1	9	5	0	0	0
	XP_040200375.1	1	8	5	0	0	0
	XP_040200376.1	1	8	5	0	0	0
	XP_040200378.1	1	8	5	0	0	0
	XP_040200379.1	1	9	6	1	0	0
XP_040200480.1		0	5	2	2	2	1
	XP_040203415.1	0	0	1	2	2	1
	XP_040210769.1	0	2	1	2	2	1
XP_040200506.1		1	1	1	12	10	8
	XP_040200507.1	1	1	1	12	10	8
	XP_040200508.1	1	1	1	12	10	8
	XP_040200509.1	1	1	1	12	10	8
	XP_040200510.1	1	1	1	12	10	8
	XP_040200511.1	1	1	1	12	10	8
	XP_040200513.1	1	1	1	12	10	8
XP_040200515.1		0	0	0	2	1	1
	XP_040200516.1	0	0	0	2	1	1
	XP_040200517.1	0	0	0	2	1	1
XP_040200546.1		8	7	2	1	0	0
	XP_040190933.1	0	0	0	1	0	0
	XP_040190934.1	0	0	0	1	0	0
	XP_040190935.1	0	0	0	1	0	0
	XP_040190936.1	0	0	0	1	0	0
	XP_040200545.1	8	7	2	1	0	0
XP_040200573.1		2	13	13	92	104	72
	XP_040200572.1	2	13	13	92	104	72
XP_040200615.1		0	0	0	8	2	3
	XP_040200614.1	0	0	0	8	2	3
	XP_040200616.1	0	0	0	8	2	3
XP_040200620.1		5	5	7	5	2	4
	XP_040200619.1	5	5	7	5	2	4
	XP_040200621.1	5	5	7	5	2	4
XP_040200714.1		2	2	1	2	1	1
	XP_040200712.1	2	2	1	2	1	1
	XP_040200713.1	2	2	1	2	1	1
XP_040200718.1		0	1	1	0	1	0
	XP_040181277.1	0	1	1	0	1	0
XP_040201531.1		0	1	0	5	3	1
	XP_040201532.1	0	1	0	5	3	1
XP_040201577.1		0	3	0	0	1	1
	XP_040201572.1	0	0	0	0	1	1
XP_040201588.1		0	0	0	1	2	1
	XP_040201587.1	0	0	0	1	2	1
XP_040201734.1		5	8	7	14	10	9
	XP_040201735.1	5	8	7	14	10	9
XP_040201777.1		0	6	9	5	0	1
	XP_040201775.1	0	6	9	5	0	1
XP_040201818.1		2	2	1	1	0	0
	XP_040201815.1	2	2	1	1	0	0
	XP_040201816.1	2	2	1	1	0	0
	XP_040201817.1	2	2	1	1	0	0
XP_040202209.1		0	3	2	0	0	1
	XP_040202210.1	0	3	2	0	0	1
	XP_040202211.1	0	3	2	0	0	1
	XP_040202212.1	0	3	2	0	0	1
	XP_040202213.1	0	3	2	0	0	1
XP_040202269.1		6	8	5	1	4	4
	XP_040179024.1	6	0	0	1	0	3
XP_040202366.1		6	23	23	12	7	4
	XP_040202367.1	6	23	23	12	7	4
	XP_040202368.1	6	23	23	12	7	4
	XP_040202369.1	6	23	23	12	7	4
	XP_040202370.1	6	0	0	0	7	4
	XP_040202371.1	6	0	0	0	7	4
XP_040202396.1		1	6	4	8	7	6
	XP_040202395.1	1	6	4	8	7	6
	XP_040202397.1	1	5	3	8	7	6
	XP_040213161.1	1	0	0	0	0	0
	XP_040213169.1	1	0	0	0	0	0
	XP_040213177.1	1	0	0	0	0	0
XP_040202455.1		1	1	1	4	3	5
	XP_040207801.1	2	2	1	0	2	4
	XP_040212186.1	1	1	1	0	2	0
XP_040202502.1		2	3	2	2	1	2
	XP_040202503.1	2	3	2	2	1	2
	XP_040202504.1	2	3	2	2	1	2
XP_040202601.1		3	13	14	4	4	3
	XP_040202602.1	3	13	14	4	4	3
XP_040202690.1		1	1	1	0	0	0
	XP_040202691.1	1	1	1	0	0	0
XP_040202700.1		0	1	2	2	2	1
	XP_040202699.1	0	1	2	2	2	1
XP_040202934.1		0	6	5	10	3	3
	XP_040202931.1	0	6	4	9	3	3
	XP_040202932.1	0	6	4	9	3	3
	XP_040202933.1	0	6	4	9	3	3
	XP_040202935.1	0	6	4	9	3	3
	XP_040202936.1	0	6	4	9	3	3
XP_040203004.1		1	5	5	3	2	1
	XP_040203003.1	1	5	5	3	2	1
XP_040203093.1		0	1	1	2	13	11
	XP_040190174.1	0	0	0	0	2	3
	XP_040190175.1	0	0	0	0	2	3
	XP_040190176.1	0	1	1	2	11	9
	XP_040190177.1	0	1	1	2	11	9
	XP_040191654.1	0	0	0	0	1	1
	XP_040197608.1	0	0	0	3	2	3
	XP_040197909.1	0	0	0	0	2	2
	XP_040197911.1	0	0	0	0	6	0
	XP_040202990.1	0	0	0	0	6	8
	XP_040202991.1	0	0	0	0	6	8
	XP_040202994.1	0	0	0	0	3	5
	XP_040202997.1	0	0	0	0	2	3
	XP_040203013.1	0	0	0	0	1	3
	XP_040203014.1	0	0	0	0	1	2
	XP_040203015.1	0	0	0	0	2	4
	XP_040203017.1	0	0	0	0	3	6
	XP_040203021.1	0	0	0	0	1	2
	XP_040203041.1	0	0	0	0	3	6
	XP_040203051.1	0	0	0	0	1	2
	XP_040203091.1	0	0	0	0	2	4
	XP_040203108.1	0	0	0	6	7	9
	XP_040210454.1	0	0	0	0	2	4
XP_040203556.1		0	1	1	3	2	2
	XP_040203562.1	0	1	1	3	2	2
	XP_040203568.1	0	1	1	3	2	2
XP_040203707.1		0	1	1	1	1	0
	XP_040214783.1	0	1	1	1	1	0
XP_040203775.1		3	9	7	8	8	7
	XP_040203778.1	3	9	7	8	8	7
XP_040204162.1		1	5	5	1	1	2
	XP_040204163.1	1	5	5	1	1	2
XP_040204233.1		0	1	3	0	6	4
	XP_040204224.1	0	1	3	0	6	4
XP_040204591.1		0	2	3	3	0	0
	XP_040204592.1	0	2	3	3	0	0
XP_040204749.1		0	1	0	0	1	1
	XP_040204750.1	0	1	0	0	1	1
	XP_040204751.1	0	1	0	0	1	1
	XP_040204752.1	0	1	0	0	1	1
	XP_040204753.1	0	1	0	0	1	1
	XP_040204754.1	0	1	0	0	1	1
	XP_040204755.1	0	1	0	0	1	1
	XP_040204756.1	0	1	0	0	1	1
	XP_040204757.1	0	1	0	0	1	1
	XP_040204758.1	0	1	0	0	1	1
	XP_040204759.1	0	1	0	0	1	1
XP_040204804.1		0	4	2	3	0	0
	XP_040204805.1	0	4	2	3	0	0
XP_040205185.1		1	1	1	1	0	0
	XP_040205184.1	1	1	1	1	0	0
XP_040205349.1		2	3	3	3	3	2
	XP_040205340.1	2	3	3	3	3	2
XP_040205357.1		1	3	2	3	2	1
	XP_040202961.1	1	0	1	0	0	0
	XP_040202962.1	1	0	1	0	0	0
XP_040205391.1		1	9	15	13	12	9
	XP_040205388.1	1	9	15	13	12	9
	XP_040205389.1	1	9	15	13	12	9
	XP_040205390.1	1	9	15	13	12	9
XP_040205597.1		12	24	18	13	9	9
	XP_040205594.1	10	18	13	11	9	6
	XP_040205595.1	10	18	13	11	9	6
	XP_040205596.1	10	18	13	11	9	6
	XP_040205598.1	12	24	18	13	9	9
	XP_040205599.1	12	24	18	13	9	9
	XP_040205600.1	12	24	18	13	9	9
XP_040205636.1		39	79	83	37	32	28
	XP_040205637.1	39	79	83	37	32	28
	XP_040205638.1	39	79	83	37	32	28
	XP_040206179.1	0	2	3	4	4	2
	XP_040206180.1	0	2	3	4	4	2
XP_040205713.1		1	5	2	1	2	1
	XP_040205712.1	1	5	2	1	2	1
XP_040205825.1		1	5	4	5	6	5
	XP_040205826.1	1	5	4	5	6	5
XP_040205858.1		3	4	2	1	0	1
	XP_040205857.1	3	4	2	1	0	1
XP_040205876.1		0	1	1	1	0	0
	XP_040205882.1	0	1	1	1	0	0
	XP_040205891.1	0	1	1	1	0	0
XP_040205988.1		3	12	9	8	6	8
	XP_040205989.1	3	12	9	8	6	8
	XP_040205991.1	3	11	10	8	6	8
	XP_040205992.1	3	12	10	8	6	8
	XP_040205993.1	3	11	9	8	6	8
	XP_040205994.1	3	0	9	8	6	8
	XP_040205995.1	3	0	9	8	6	8
	XP_040205997.1	3	0	0	8	6	8
XP_040206119.1		1	3	0	1	1	1
	XP_040193779.1	1	2	0	1	0	1
XP_040206198.1		3	8	3	5	4	5
	XP_040192974.1	3	0	2	3	4	4
XP_040206662.1		1	0	0	1	1	0
	XP_040206653.1	1	0	0	1	1	0
XP_040206704.1		3	2	2	1	1	1
	XP_040206705.1	3	2	2	1	1	1
	XP_040206706.1	3	2	2	1	1	1
	XP_040206707.1	3	2	2	1	1	1
	XP_040206708.1	3	2	2	1	1	1
XP_040206955.1		1	1	2	0	0	1
	XP_040184773.1	0	1	1	0	0	1
	XP_040184774.1	0	1	1	0	0	1
	XP_040203824.1	0	1	2	0	0	1
	XP_040206954.1	1	1	2	0	0	1
XP_040206990.1		6	5	4	2	0	0
	XP_040215476.1	5	0	3	0	0	0
XP_040207006.1		0	0	0	1	2	2
	XP_040203005.1	0	0	0	1	0	1
	XP_040205392.1	0	0	0	1	0	1
	XP_040205394.1	0	0	0	1	0	1
XP_040207061.1		0	0	1	5	4	5
	XP_040207062.1	0	0	1	5	4	5
XP_040207083.1		0	0	0	9	7	3
	XP_040207085.1	0	0	0	9	7	3
	XP_040207086.1	0	0	0	0	0	2
XP_040207475.1		1	2	0	1	0	0
	XP_040207474.1	1	2	0	1	0	0
	XP_040207477.1	1	2	0	1	0	0
	XP_040207478.1	1	2	0	1	0	0
XP_040207513.1		10	6	4	3	2	3
	XP_040188693.1	10	6	4	3	2	3
XP_040207687.1		0	0	0	3	3	3
	XP_040207688.1	0	0	0	3	3	3
XP_040207735.1		0	0	0	10	4	3
	XP_040207734.1	0	0	0	10	4	3
XP_040207812.1		0	0	0	4	1	1
	XP_040207811.1	0	0	0	4	1	1
XP_040207849.1		6	8	4	2	0	2
	XP_040201130.1	6	8	4	2	0	2
	XP_040201131.1	6	8	4	2	0	2
XP_040207866.1		4	9	7	2	2	1
	XP_040191489.1	3	8	0	0	2	1
	XP_040207867.1	4	9	7	2	2	1
	XP_040207868.1	4	9	7	2	2	1
	XP_040207869.1	4	9	7	2	2	1
	XP_040207870.1	4	9	7	2	2	1
	XP_040207871.1	4	9	7	2	2	1
XP_040207949.1		1	6	0	14	8	11
	XP_040207955.1	1	6	0	14	8	11
XP_040208265.1		0	29	44	4	0	1
	XP_040208266.1	0	28	43	4	0	1
	XP_040208267.1	0	3	7	4	0	1
XP_040208376.1		2	4	5	4	4	3
	XP_040208367.1	2	4	5	4	4	3
	XP_040208385.1	2	4	5	4	4	3
	XP_040208394.1	2	4	5	4	4	3
	XP_040208403.1	2	4	5	4	4	3
XP_040208437.1		1	5	3	2	0	0
	XP_040208445.1	1	5	3	2	0	0
	XP_040208453.1	1	5	3	2	0	0
	XP_040208464.1	1	5	3	2	0	0
XP_040208782.1		0	1	1	1	1	1
	XP_040208790.1	0	1	1	1	1	1
	XP_040208798.1	0	1	1	1	1	1
	XP_040208805.1	0	1	1	1	1	1
	XP_040208815.1	0	1	1	1	1	1
XP_040208823.1		3	2	2	2	0	1
	XP_040208824.1	3	2	2	2	0	1
	XP_040208825.1	3	2	2	2	0	1
XP_040208826.1		8	6	3	3	3	3
	XP_040208828.1	8	6	3	3	3	3
	XP_040208829.1	8	6	3	3	3	3
	XP_040208830.1	8	6	3	3	3	3
XP_040208963.1		0	8	2	15	9	7
	XP_040208962.1	0	8	2	15	9	7
XP_040209088.1		1	1	0	1	1	0
	XP_040209087.1	1	1	0	1	1	0
	XP_040209089.1	1	1	0	1	1	0
XP_040209261.1		1	2	0	2	1	1
	XP_040209262.1	1	2	0	2	1	1
	XP_040209263.1	1	2	0	2	1	1
	XP_040209264.1	1	2	0	2	1	1
XP_040209383.1		0	0	0	3	2	1
	XP_040209384.1	0	0	0	3	2	1
	XP_040209385.1	0	0	0	3	2	1
	XP_040209386.1	0	0	0	3	2	1
	XP_040209387.1	0	0	0	3	2	1
	XP_040209389.1	0	0	0	3	2	1
XP_040209457.1		4	14	8	6	2	3
	XP_040209456.1	4	14	8	6	2	3
	XP_040209458.1	4	14	8	6	2	3
	XP_040209459.1	4	14	8	6	2	3
XP_040209544.1		2	0	0	4	4	3
	XP_040209542.1	2	0	0	4	4	3
	XP_040209543.1	2	0	0	4	4	3
XP_040209557.1		2	2	1	1	1	1
	XP_040209556.1	2	2	1	1	1	1
XP_040209652.1		1	1	1	10	9	7
	XP_040209653.1	1	1	1	10	9	7
	XP_040209654.1	1	1	1	10	9	7
XP_040209700.1		0	2	2	7	3	5
	XP_040209701.1	0	1	0	6	2	0
XP_040209711.1		3	3	0	0	1	0
	XP_040209712.1	3	3	0	0	0	0
XP_040209782.1		1	2	1	0	0	0
	XP_040209783.1	0	1	0	0	0	0
XP_040209850.1		2	8	4	0	1	1
	XP_040209849.1	2	8	4	0	1	1
	XP_040209851.1	2	6	3	0	1	1
	XP_040209852.1	2	0	0	0	1	1
XP_040209976.1		0	1	1	0	1	0
	XP_040209977.1	0	1	1	0	1	0
XP_040210106.1		0	0	0	1	2	1
	XP_040187101.1	0	0	0	0	1	0
XP_040210137.1		1	4	3	2	3	3
	XP_040185649.1	0	1	0	0	0	0
	XP_040185650.1	0	1	0	0	0	0
	XP_040185651.1	0	1	0	0	0	0
	XP_040185652.1	0	1	0	0	0	0
	XP_040210138.1	1	4	3	2	3	3
XP_040210190.1		10	10	8	8	6	8
	XP_040203439.1	10	10	8	8	6	8
	XP_040203442.1	10	10	8	8	6	8
XP_040210593.1		0	2	1	3	2	0
	XP_040210592.1	0	2	1	3	2	0
XP_040210692.1		2	3	3	4	4	3
	XP_040191765.1	2	2	2	3	3	2
	XP_040195569.1	2	3	3	4	4	3
XP_040210698.1		4	1	2	0	0	0
	XP_040210699.1	3	1	1	0	0	0
	XP_040210700.1	3	1	1	0	0	0
XP_040210732.1		0	5	3	0	1	0
	XP_040210733.1	0	5	3	0	1	0
	XP_040210734.1	0	5	3	0	1	0
	XP_040210735.1	0	5	3	0	1	0
	XP_040210736.1	0	5	3	0	1	0
	XP_040210737.1	0	5	3	0	1	0
	XP_040210738.1	0	5	3	0	1	0
	XP_040210739.1	0	5	3	0	1	0
	XP_040210740.1	0	5	3	0	1	0
	XP_040210741.1	0	5	3	0	1	0
	XP_040210742.1	0	5	3	0	1	0
	XP_040210743.1	0	5	3	0	1	0
	XP_040210744.1	0	5	3	0	1	0
	XP_040210745.1	0	4	3	0	1	0
	XP_040210747.1	0	5	3	0	1	0
XP_040211013.1		5	3	2	2	3	1
	XP_040211014.1	4	0	1	2	3	1
	XP_040211015.1	5	3	2	2	3	1
	XP_040211016.1	5	3	2	2	3	1
	XP_040211017.1	4	0	1	2	3	1
	XP_040211018.1	4	0	1	2	3	1
XP_040211261.1		0	1	0	1	1	0
	XP_040211262.1	0	1	0	1	1	0
XP_040211459.1		0	0	0	2	1	1
	XP_040211458.1	0	0	0	2	1	1
XP_040211460.1		5	8	6	5	6	3
	XP_040211466.1	5	6	6	5	5	3
	XP_040211472.1	5	8	6	5	6	3
XP_040211592.1		0	0	0	1	2	2
	XP_040177757.1	0	0	0	2	1	2
	XP_040177767.1	0	0	0	2	1	2
	XP_040177776.1	0	0	0	2	1	2
	XP_040177783.1	0	0	0	2	1	2
	XP_040177792.1	0	0	0	2	1	2
	XP_040177801.1	0	0	0	2	1	2
	XP_040177811.1	0	0	0	2	1	2
	XP_040177819.1	0	0	0	1	1	2
	XP_040177826.1	0	0	0	2	1	2
	XP_040211600.1	0	0	0	1	2	2
	XP_040211608.1	0	0	0	1	2	2
	XP_040211615.1	0	0	0	1	2	2
	XP_040211725.1	0	0	0	1	2	2
XP_040211832.1		1	1	1	0	0	0
	XP_040211831.1	1	1	1	0	0	0
	XP_040211833.1	1	1	1	0	0	0
XP_040211866.1		2	6	5	2	1	1
	XP_040202907.1	2	6	5	2	1	1
XP_040211943.1		6	3	2	3	1	2
	XP_040211944.1	6	3	2	3	1	2
	XP_040211945.1	6	3	2	3	1	2
	XP_040211946.1	6	3	2	3	1	2
	XP_040211947.1	6	3	2	3	1	2
	XP_040211948.1	0	0	1	2	1	1
	XP_040211949.1	0	0	1	2	1	1
XP_040211969.1		29	73	51	31	24	24
	XP_040190702.1	0	1	0	1	1	1
	XP_040191592.1	0	0	0	3	0	1
	XP_040191605.1	0	1	0	2	1	1
	XP_040191606.1	0	1	0	2	1	1
	XP_040211951.1	17	40	33	18	22	19
	XP_040211953.1	0	0	0	0	5	0
	XP_040211954.1	0	0	0	0	5	0
	XP_040211955.1	0	26	22	12	6	4
	XP_040211956.1	0	0	0	0	5	0
	XP_040211957.1	0	26	22	12	6	4
	XP_040211958.1	0	0	0	0	5	0
	XP_040211959.1	0	0	0	0	5	0
	XP_040211960.1	0	26	22	0	5	0
	XP_040211961.1	4	30	26	13	5	5
	XP_040211962.1	0	27	24	0	5	0
	XP_040211963.1	0	0	22	0	5	0
	XP_040211964.1	0	0	0	0	5	0
	XP_040211965.1	0	24	21	0	5	0
	XP_040211966.1	0	0	0	0	5	0
	XP_040211968.1	0	25	0	0	5	0
XP_040212056.1		0	0	0	2	1	2
	XP_040212057.1	0	0	0	2	1	2
XP_040212087.1		1	4	3	2	2	2
	XP_040212086.1	1	4	3	2	2	2
XP_040212384.1		0	4	4	9	7	7
	XP_040212385.1	0	4	4	9	7	7
	XP_040212386.1	0	4	4	9	7	7
	XP_040212388.1	0	4	4	9	7	7
XP_040212551.1		14	15	10	10	11	10
	XP_040212549.1	14	15	10	10	11	10
	XP_040212550.1	14	15	10	10	11	10
	XP_040212552.1	14	15	10	10	11	10
XP_040212680.1		0	3	2	0	0	1
	XP_040212679.1	0	3	2	0	0	1
XP_040212751.1		16	25	16	35	24	25
	XP_040210056.1	15	30	27	28	24	24
XP_040212900.1		14	20	14	11	9	6
	XP_040212901.1	14	0	12	11	9	6
XP_040213025.1		1	2	1	0	0	0
	XP_040213026.1	1	2	1	0	0	0
	XP_040213027.1	1	2	1	0	0	0
	XP_040213028.1	1	2	1	0	0	0
XP_040213048.1		72	97	81	40	39	38
	XP_040184984.1	0	0	42	22	21	20
	XP_040184986.1	0	0	42	22	21	20
	XP_040186887.1	79	97	72	42	38	35
	XP_040189093.1	37	51	43	22	21	20
	XP_040206641.1	36	0	0	22	21	19
	XP_040206642.1	36	0	0	22	21	19
	XP_040207853.1	37	51	43	22	21	20
	XP_040218035.1	0	0	0	0	17	18
XP_040213054.1		0	2	2	7	4	3
	XP_040213055.1	0	2	2	7	4	3
XP_040213178.1		0	5	5	2	2	1
	XP_040213176.1	0	5	5	2	2	1
XP_040213540.1		1	1	2	0	1	0
	XP_040213541.1	1	1	2	0	1	0
XP_040213608.1		5	4	5	6	3	4
	XP_040213609.1	5	4	5	6	3	4
	XP_040213611.1	5	4	5	6	3	4
	XP_040213612.1	5	4	5	6	3	4
XP_040213687.1		17	13	10	9	15	13
	XP_040213688.1	17	13	10	9	15	13
	XP_040213689.1	17	13	10	9	15	13
XP_040213702.1		0	3	1	2	7	2
	XP_040187129.1	0	2	3	1	4	2
	XP_040187130.1	0	2	3	1	4	2
	XP_040187131.1	0	2	3	1	4	2
	XP_040213700.1	0	2	1	2	7	2
	XP_040213701.1	0	3	1	2	7	2
	XP_040213703.1	0	2	1	2	7	2
XP_040213881.1		0	8	9	21	12	17
	XP_040213882.1	0	8	9	21	12	17
	XP_040213883.1	0	8	9	21	12	17
XP_040213931.1		0	8	8	8	15	9
	XP_040213932.1	0	8	8	8	15	9
	XP_040213933.1	0	8	8	8	15	9
	XP_040213934.1	0	8	8	8	15	9
	XP_040213936.1	0	8	8	8	15	9
	XP_040213937.1	0	8	8	8	15	9
XP_040214066.1		3	5	2	0	0	0
	XP_040214067.1	3	5	2	0	0	0
XP_040214150.1		0	1	0	0	2	1
	XP_040214149.1	0	1	0	0	2	1
XP_040214212.1		2	5	9	4	7	3
	XP_040214211.1	2	5	9	4	7	3
	XP_040214213.1	2	5	9	4	7	3
XP_040214214.1		3	1	1	0	2	2
	XP_040214215.1	3	1	1	0	2	2
XP_040214613.1		1	3	1	0	0	0
	XP_040214612.1	1	3	1	0	0	0
XP_040214622.1		1	0	1	7	4	4
	XP_040214623.1	1	0	1	7	4	4
XP_040214640.1		0	2	6	7	6	4
	XP_040214639.1	0	2	6	7	6	4
XP_040214755.1		0	1	1	5	6	2
	XP_040214753.1	0	1	1	5	6	2
XP_040215051.1		2	4	1	2	2	1
	XP_040215061.1	2	4	1	2	2	1
XP_040215112.1		0	3	3	1	4	1
	XP_040195661.1	0	0	2	1	4	1
XP_040215263.1		0	0	0	3	1	1
	XP_040215262.1	0	0	0	2	1	1
XP_040215430.1		0	3	4	8	6	3
	XP_040215356.1	0	3	4	0	0	3
XP_040215520.1		1	9	9	4	6	5
	XP_040215521.1	1	9	9	4	6	5
XP_040215573.1		13	11	8	17	19	19
	XP_040215572.1	13	11	8	17	19	19
XP_040215604.1		9	6	7	3	7	4
	XP_040179741.1	9	6	7	3	7	4
	XP_040179750.1	9	0	0	3	6	3
	XP_040184106.1	9	0	0	3	6	3
XP_040215675.1		4	1	2	0	1	2
	XP_040215671.1	4	1	2	0	1	2
	XP_040215673.1	4	1	2	0	1	2
	XP_040215674.1	4	1	2	0	1	2
XP_040216252.1		2	12	16	10	6	8
	XP_040216251.1	2	12	16	10	6	8
	XP_040216253.1	2	0	0	0	0	0
XP_040216405.1		3	4	3	0	0	0
	XP_040216388.1	3	4	3	0	0	0
	XP_040216396.1	3	4	3	0	0	0
	XP_040216413.1	3	4	3	0	0	0
XP_040216530.1		0	1	1	4	1	2
	XP_040187803.1	0	1	1	4	1	2
XP_040216588.1		7	17	9	14	12	11
	XP_040202576.1	0	0	0	4	3	2
	XP_040202577.1	0	0	0	4	3	2
	XP_040202578.1	0	0	0	4	3	2
	XP_040202579.1	0	0	0	4	3	2
	XP_040216589.1	6	16	9	0	12	11
	XP_040216590.1	6	16	0	0	0	0
	XP_040216591.1	7	17	9	14	12	11
XP_040216625.1		4	3	1	3	4	5
	XP_040216624.1	4	3	1	3	4	5
XP_040216711.1		2	4	2	0	0	0
	XP_040216709.1	0	4	2	0	0	0
XP_040216887.1		0	8	6	5	4	4
	XP_040191502.1	0	0	0	3	0	3
XP_040216898.1		0	4	4	9	6	8
	XP_040216899.1	0	4	4	9	6	8
	XP_040216900.1	0	4	4	9	6	8
	XP_040216901.1	0	4	4	9	6	8
	XP_040216902.1	0	3	4	0	0	0
XP_040217065.1		6	6	2	2	2	1
	XP_040183098.1	3	5	3	1	0	1
	XP_040188890.1	5	5	2	2	2	1
	XP_040188891.1	5	5	2	2	2	1
	XP_040191313.1	4	5	0	1	0	1
XP_040217120.1		1	2	2	1	0	1
	XP_040217121.1	1	2	2	1	0	1
XP_040217125.1		6	10	6	9	6	6
	XP_040217123.1	6	10	6	9	6	6
	XP_040217124.1	6	10	6	9	6	6
XP_040217126.1		7	21	16	18	11	13
	XP_040217127.1	7	21	16	18	11	13
	XP_040217128.1	7	21	16	18	11	13
	XP_040217129.1	7	20	16	18	11	13
XP_040217237.1		1	1	1	0	0	0
	XP_040217236.1	1	1	1	0	0	0
XP_040217274.1		1	4	7	9	9	9
	XP_040217275.1	1	4	7	9	9	9
XP_040217398.1		5	9	3	1	4	3
	XP_040217399.1	5	9	3	1	4	3
XP_040217877.1		0	1	0	2	1	1
	XP_040217878.1	0	0	0	1	0	1
XP_040218114.1		5	11	9	12	9	9
	XP_040218115.1	5	11	9	12	9	9
XP_040218128.1		0	1	0	1	0	1
	XP_040218129.1	0	1	0	1	0	1
	XP_040218130.1	0	1	0	1	0	1
XP_040218180.1		3	6	3	4	4	5
	XP_040218181.1	3	6	3	4	4	5

## Sheet: settings
ProteinPilot summary analyzer		Param	1.1	1.2	1.3	1.4	1.5	1.6
#Protein filter		FDR_0.1	507	791	664	623	518	466
Global FDR critical value (<% k or default): 1.0 1.0 15		FDR_0.5	560	891	769	751	659	625
ID exclusion list: contam.txt		FDR_1.0	582	934	814	805	719	693
Peptide confidence (value or default):		FDR_2.0	605	977	859	860	780	761
Protein grouping (conf): >=80		T[0.05;0.1]	56	71	75	74	74	55
#Peptide filter		D[0.05;0.1]	26	32	48	46	47	27
Peptide confidence (value): >=50		k	2.154	2.219	1.562	1.609	1.574	2.037
#Output filter		a	2.1e-08	2.96e-07	3.629e-06	3.7831e-05	0.000269936	0.000871531
Min groups with ID: 1		b	0.0303853	0.0160968	0.0153873	0.0126419	0.0114232	0.010171
Max missing values per group: 3		R^2	0.892	0.9665	0.9534	0.9682	0.9487	0.9537
		MAE	-0.0176	0.0033	0.0053	0	0.0156	0.013
		MAPE	0.1658	0.1092	0.1381	0.0945	0.1009	0.0701
